# Supplementary material for: Use of multiple epinephrine doses in anaphylaxis: A systematic review and meta-analysis
Source: PubMed Central journal article supplement (PMC8588837; doi:10.1016/j.jaci.2021.03.042), 2021-11
Supplement: mmc1.pdf [file mmc1.pdf]

## ONLINE SUPPLEMENT

### **Use of multiple epinephrine doses in anaphylaxis: A systematic review and meta-analysis**

Nandinee Patel,<sup>1</sup> Kok Wee Chong,<sup>2</sup> Alexander Y.G. Yip,<sup>3</sup> Despo Ierodiakonou,<sup>4</sup> Joan Bartra,<sup>5</sup>  
Robert J. Boyle,<sup>1</sup> Paul J Turner<sup>1</sup>

<sup>1</sup>National Heart & Lung Institute, Imperial College London, London, UK;

<sup>2</sup>Allergy Service, Department of Paediatric Medicine, KK Women's and Children's Hospital, Singapore;

<sup>3</sup>School of Medicine, Imperial College London, London, UK;

<sup>4</sup>Department of Primary Care and Population Health, University of Nicosia Medical School, Nicosia, Cyprus, Greece

<sup>5</sup>Hospital Clínic de Barcelona, Barcelona, Spain.

#### **\*Corresponding author:**

Dr Paul Turner

National Heart & Lung Institute,

Imperial College London,

Norfolk Place

London, W2 1PG

Email: p.turner@imperial.ac.uk

## Contents

|                                                                                                                                                   |    |
|---------------------------------------------------------------------------------------------------------------------------------------------------|----|
| <b>A. Additional Methods</b> .....                                                                                                                | 4  |
| <b>Search Strategy and Eligibility/Inclusion Criteria</b> .....                                                                                   | 4  |
| <b>Table S1. Embase Search Strategy:</b> .....                                                                                                    | 5  |
| <b>Table S2. Medline Search Strategy</b> .....                                                                                                    | 6  |
| <b>Table S3. Cochrane Search Strategy</b> .....                                                                                                   | 7  |
| <b>B. Number of Datasets and Events included in each Metanalysis</b> .....                                                                        | 8  |
| <b>Table S4. Number of Studies and Number of Analysis in each data-set for each sub-analyses.</b> 8                                               |    |
| <b>C. Breakdown of the percentage of reactions in each dataset by trigger (for ALL Cause Anaphylaxis analyses)</b> .....                          | 9  |
| <b>Table S5. Proportion of reactions (by aetiology) in each dataset</b> .....                                                                     | 9  |
| <b>D. Risk of Bias Tables</b> .....                                                                                                               | 11 |
| <b>Table S6: Risk of Bias assessment for all datasets (N=78) ED: emergency department, FC: food challenge, FT: full-text, ABS: Abstract</b> ..... | 11 |
| <b>E. Additional Pooled Estimates and Forest Plots</b> .....                                                                                      | 14 |
| <b>Table S7: Pooled Estimates for all sub-analyses</b> .....                                                                                      | 14 |
| <b>Figure S1. Proportion of patients with allergic reactions who were diagnosed as having anaphylaxis: all trigger</b> .....                      | 15 |
| <b>Figure S2. Proportion of patients with allergic reactions who were diagnosed as having anaphylaxis: food</b> .....                             | 16 |
| <b>Figure S3. Proportion of patients with allergic reactions who were diagnosed as having anaphylaxis: venom</b> .....                            | 16 |
| <b>Figure S4. Proportion of anaphylaxis treated with multiple epinephrine doses: all trigger</b> ....                                             | 17 |
| <b>Figure S5. Proportion of anaphylaxis treated with multiple epinephrine doses: food</b> .....                                                   | 18 |
| <b>Figure S6. Proportion of anaphylaxis treated with multiple epinephrine doses: venom</b> .....                                                  | 19 |
| <b>Figure S7. Cardiorespiratory reactions treated with multiple epinephrine doses: all triggers</b> 20                                            |    |
| <b>Figure S8. Cardiorespiratory reactions treated with multiple epinephrine doses: food</b> .....                                                 | 21 |
| <b>Figure S9. Cardiorespiratory reactions treated with multiple epinephrine doses: venom</b> .....                                                | 21 |
| <b>Figure S10. Epinephrine-treated reactions where multiple epinephrine doses were administered: all triggers</b> .....                           | 22 |
| <b>Figure S11. Epinephrine-treated reactions where multiple epinephrine doses were administered: food</b> .....                                   | 23 |
| <b>Figure S12. Epinephrine-treated reactions where multiple epinephrine doses were administered: venom</b> .....                                  | 24 |
| <b>Figure S13. Anaphylaxis reactions treated with multiple epinephrine doses by a health-care professional: all trigger</b> .....                 | 25 |
| <b>Figure S14. Anaphylaxis reactions treated with multiple epinephrine doses by a health-care professional: food</b> .....                        | 26 |

|                                                                                                                                         |           |
|-----------------------------------------------------------------------------------------------------------------------------------------|-----------|
| Figure S15. Anaphylaxis reactions treated with multiple epinephrine doses by a health-care professional: venom .....                    | 26        |
| Figure S16. Epinephrine-treated reactions with multiple epinephrine doses administered by a health-care professional: all triggers..... | 27        |
| Figure S17. Epinephrine-treated reactions with multiple epinephrine doses administered by a health-care professional: food .....        | 28        |
| Figure S18. Epinephrine-treated reactions with multiple epinephrine doses administered by a health-care professional: venom.....        | 28        |
| <b>F. Funnel Plots and Egger Tests .....</b>                                                                                            | <b>29</b> |
| Figure S19: Funnel Plots for all metaanalyses: Assessment of small studies effect .....                                                 | 29        |
| Table S8: Egger Test: Intercept and p value .....                                                                                       | 31        |
| <b>G. Summary of Pooled Estimates for Sensitivity Analyses.....</b>                                                                     | <b>32</b> |
| Table S9. Pooled estimates for prospective studies only. ....                                                                           | 32        |
| Table S10. Pooled estimates for low risk of bias studies only.....                                                                      | 32        |
| Table S11. Pooled estimates for studies published after 2006 only.....                                                                  | 33        |
| Table S12. Pooled estimates for Full-Text references only.....                                                                          | 33        |
| <b>H. Record Flow: Excluded Records at Full-Text screening.....</b>                                                                     | <b>34</b> |
| Table S13: References excluded at full-text screening with reason for exclusion provided ....                                           | 34        |
| <b>I. Record Flow: Included References .....</b>                                                                                        | <b>50</b> |
| Table S14 .....                                                                                                                         | 50        |
| <b>J. Summary of Data Extraction for Included Studies .....</b>                                                                         | <b>56</b> |
| Table S15. Individual study characteristics for included references .....                                                               | 56        |

## A. Additional Methods

### Search Strategy and Eligibility/Inclusion Criteria

We searched MEDLINE, EMBASE, Cochrane Controlled Register of Trials, from launch to July 2019 for primary records referring to anaphylaxis reactions to food or venom triggers with data on the use of epinephrine. The full list of search terms for individual search databases with the records noted at each stage are listed in Table S1-S3. The search terms and strategies were reviewed by Imperial College London university library services prior to being run. The search was updated on 18 Jan 2021.

Reference lists were checked for additional publications where relevant. All primary data-records were included where at least 10 cases of anaphylaxis were reported. Where abstracts from peer-reviewed journals met eligibility criteria, data were included. Original studies from case series, registries, food challenge datasets and surveys (where health-professional review of the anaphylaxis diagnosis was apparent) were eligible. Reviews (non-original) data were excluded, although reference lists were cross-checked to include any relevant records not found via the search strategy. Where multiple publications were available with overlapping datasets, a single publication was included and authors were contacted to provide outcomes for the overall dataset where needed. Where extrapolative modelling had been performed on a sample dataset, studies were excluded unless complete data were also available on the sample, unmodelled data. Datasets exclusively focussed on cases of fatal anaphylaxis were excluded.

### Participants/Population included:

*Inclusion criteria:* All age ranges, genders, ethnicities, country of study.

*Exclusion criteria:* nil

### Intervention/Exposures

*Inclusion criteria:* We included studies where food or venom (hymenoptera) were listed (not exclusively) as known triggers in any case series. This included datasets where other triggers (eg. drug, unknown) were also included. We decided to focus on food and venom reactions as they form the key indications for epinephrine auto-injector prescription to patients.

*Exclusion criteria:* We excluded studies where there was no evidence that any food or venom anaphylaxis events were included in the study dataset. Datasets pertaining to immunotherapy-related reactions were excluded.

### Outcomes

Data was collected on the following reference and study characteristics: publication year, country of study, duration of data collection, prospective/retrospective, study design and patient characteristics, definition of anaphylaxis used.

Data was extracted on the following study outcomes: By any trigger, food-only reactions, venom-only reactions): Numbers of allergic reactions, number of anaphylaxis reactions as defined by study authors, number of cardiorespiratory reactions, epinephrine use, use of multiple epinephrine doses, use of multiple epinephrine doses where any repeat doses were administered by a health-care professional, admissions to hospital, intensive care and fatalities and salbutamol use.

**Table S1. Embase Search Strategy:**

The initial search returned 16758 records. Updated search returned an additional 2230 records. The search terms are listed below.

|                                                                                                                                                                                                                |
|----------------------------------------------------------------------------------------------------------------------------------------------------------------------------------------------------------------|
| 1. exp food allergy/                                                                                                                                                                                           |
| 2. food*.mp. [mp=title, abstract, heading word, drug trade name, original title, device manufacturer, drug manufacturer, device trade name, keyword, floating subheading word, candidate term word]            |
| 3. exp food/                                                                                                                                                                                                   |
| 4. 1 or 2 or 3                                                                                                                                                                                                 |
| 5. exp venom/                                                                                                                                                                                                  |
| 6. venom*.mp. [mp=title, abstract, heading word, drug trade name, original title, device manufacturer, drug manufacturer, device trade name, keyword, floating subheading word, candidate term word]           |
| 7. (bee or bees).mp. [mp=title, abstract, heading word, drug trade name, original title, device manufacturer, drug manufacturer, device trade name, keyword, floating subheading word, candidate term word]    |
| 8. Honeybee*.mp. [mp=title, abstract, heading word, drug trade name, original title, device manufacturer, drug manufacturer, device trade name, keyword, floating subheading word, candidate term word]        |
| 9. hymenoptera.mp. [mp=title, abstract, heading word, drug trade name, original title, device manufacturer, drug manufacturer, device trade name, keyword, floating subheading word, candidate term word]      |
| 10. (wasps or wasp).mp. [mp=title, abstract, heading word, drug trade name, original title, device manufacturer, drug manufacturer, device trade name, keyword, floating subheading word, candidate term word] |
| 11. vespid.mp. [mp=title, abstract, heading word, drug trade name, original title, device manufacturer, drug manufacturer, device trade name, keyword, floating subheading word, candidate term word]          |
| 12. vespula.mp. [mp=title, abstract, heading word, drug trade name, original title, device manufacturer, drug manufacturer, device trade name, keyword, floating subheading word, candidate term word]         |
| 13. (ant or ants).mp. [mp=title, abstract, heading word, drug trade name, original title, device manufacturer, drug manufacturer, device trade name, keyword, floating subheading word, candidate term word]   |
| 14. 6 or 7 or 8 or 9 or 10 or 11 or 12 or 13                                                                                                                                                                   |
| 15. 4 or 14                                                                                                                                                                                                    |
| 16. exp anaphylaxis/                                                                                                                                                                                           |
| 17. anaphyl*.mp. [mp=title, abstract, heading word, drug trade name, original title, device manufacturer, drug manufacturer, device trade name, keyword, floating subheading word, candidate term word]        |
| 18. 16 or 17                                                                                                                                                                                                   |
| 19. epinephrine/                                                                                                                                                                                               |
| 20. epinephrine autoinjector/                                                                                                                                                                                  |
| 21. adrenalin*.mp. [mp=title, abstract, heading word, drug trade name, original title, device manufacturer, drug manufacturer, device trade name, keyword, floating subheading word, candidate term word]      |
| 22. epinephrin*.mp. [mp=title, abstract, heading word, drug trade name, original title, device manufacturer, drug manufacturer, device trade name, keyword, floating subheading word, candidate term word]     |
| 23. epipen*.mp. [mp=title, abstract, heading word, drug trade name, original title, device manufacturer, drug manufacturer, device trade name, keyword, floating subheading word, candidate term word]         |
| 24. 19 or 20 or 21 or 22 or 23                                                                                                                                                                                 |
| 25. 18 or 24                                                                                                                                                                                                   |
| 26. 25 and 15                                                                                                                                                                                                  |
| 27. (exp animal/ or nonhuman/) not exp human/                                                                                                                                                                  |
| 28. 26 not 27                                                                                                                                                                                                  |
| 29. limit 28 to ("systematic review" and "review")                                                                                                                                                             |
| 30. 28 not 29                                                                                                                                                                                                  |

**Table S2. Medline Search Strategy**

The initial search returned 8645 records. Updated search returned an additional 996 records. The search terms are listed below.

|                                                                                                                                                                                                                |
|----------------------------------------------------------------------------------------------------------------------------------------------------------------------------------------------------------------|
| 1. exp Food Hypersensitivity/                                                                                                                                                                                  |
| 2. food*.mp. [mp=title, abstract, heading word, drug trade name, original title, device manufacturer, drug manufacturer, device trade name, keyword, floating subheading word, candidate term word]            |
| 3. exp Food/                                                                                                                                                                                                   |
| 4. 1 or 2 or 3                                                                                                                                                                                                 |
| 5. exp Venoms/                                                                                                                                                                                                 |
| 6. venom*.mp. [mp=title, abstract, heading word, drug trade name, original title, device manufacturer, drug manufacturer, device trade name, keyword, floating subheading word, candidate term word]           |
| 7. exp Hymenoptera/                                                                                                                                                                                            |
| 8. exp Arthropod Venoms/                                                                                                                                                                                       |
| 9. (bee or bees).mp. [mp=title, abstract, heading word, drug trade name, original title, device manufacturer, drug manufacturer, device trade name, keyword, floating subheading word, candidate term word]    |
| 10. Honeybee*.mp. [mp=title, abstract, heading word, drug trade name, original title, device manufacturer, drug manufacturer, device trade name, keyword, floating subheading word, candidate term word]       |
| 11. hymenoptera.mp. [mp=title, abstract, heading word, drug trade name, original title, device manufacturer, drug manufacturer, device trade name, keyword, floating subheading word, candidate term word]     |
| 12. (wasps or wasp).mp. [mp=title, abstract, heading word, drug trade name, original title, device manufacturer, drug manufacturer, device trade name, keyword, floating subheading word, candidate term word] |
| 13. vespid.mp. [mp=title, abstract, heading word, drug trade name, original title, device manufacturer, drug manufacturer, device trade name, keyword, floating subheading word, candidate term word]          |
| 14. vespula.mp. [mp=title, abstract, heading word, drug trade name, original title, device manufacturer, drug manufacturer, device trade name, keyword, floating subheading word, candidate term word]         |
| 15. (ant or ants).mp. [mp=title, abstract, heading word, drug trade name, original title, device manufacturer, drug manufacturer, device trade name, keyword, floating subheading word, candidate term word]   |
| 16. 5 or 6 or 7 or 8 or 9 or 10 or 11 or 12 or 13 or 14 or 15                                                                                                                                                  |
| 17. 4 or 16                                                                                                                                                                                                    |
| 18. exp Anaphylaxis/                                                                                                                                                                                           |
| 19. anaphyl*.mp. [mp=title, abstract, heading word, drug trade name, original title, device manufacturer, drug manufacturer, device trade name, keyword, floating subheading word, candidate term word]        |
| 20. 18 or 19                                                                                                                                                                                                   |
| 21. exp Epinephrine/                                                                                                                                                                                           |
| 22. adrenalin*.mp. [mp=title, abstract, heading word, drug trade name, original title, device manufacturer, drug manufacturer, device trade name, keyword, floating subheading word, candidate term word]      |
| 23. epinephrin*.mp. [mp=title, abstract, heading word, drug trade name, original title, device manufacturer, drug manufacturer, device trade name, keyword, floating subheading word, candidate term word]     |
| 24. epipen*.mp. [mp=title, abstract, heading word, drug trade name, original title, device manufacturer, drug manufacturer, device trade name, keyword, floating subheading word, candidate term word]         |
| 25. 21 or 22 or 23 or 24                                                                                                                                                                                       |
| 26. 20 or 25                                                                                                                                                                                                   |
| 27. 17 and 26                                                                                                                                                                                                  |
| 28. exp animals/ not humans.sh.                                                                                                                                                                                |
| 29. 27 not 28                                                                                                                                                                                                  |
| 30. limit 29 to ("systematic review" and "review")                                                                                                                                                             |
| 31. 29 not 30                                                                                                                                                                                                  |

### Table S3. Cochrane Search Strategy

The search terms and records returned in the initial and updated search are listed below.

|                                                                                                                                                                                                                                                    |                     |             |            |
|----------------------------------------------------------------------------------------------------------------------------------------------------------------------------------------------------------------------------------------------------|---------------------|-------------|------------|
| "Adrenalin" in Title Abstract Keyword OR "adrenaline" in Title Abstract Keyword OR "anaphylaxis" in Title Abstract Keyword - with Cochrane Library publication date Between Jan 1900 and May 2019 (Word variations have been searched). Generates: |                     |             |            |
| Initial search:<br>protocol                                                                                                                                                                                                                        | 34 Cochrane reviews | 5260 trials | 1 Cochrane |
| Additional records in updated search:<br>protocol                                                                                                                                                                                                  | 5 Cochrane reviews  | 370 trials  | 0 Cochrane |

## B. Number of Datasets and Events included in each Metanalysis

The number of datasets and number of allergic reactions (denominator) in each Metanalysis are listed below.

Table S4. Number of Studies and Number of Analysis in each data-set for each sub-analyses

|                                                                                                         | Number of datasets in analysis |                |             | Number of reactions in analysis |                |             |
|---------------------------------------------------------------------------------------------------------|--------------------------------|----------------|-------------|---------------------------------|----------------|-------------|
|                                                                                                         | Accidental Reactions           | Food Challenge | All Studies | Accidental Reactions            | Food Challenge | All Studies |
| <i>Proportion of patients with allergic reactions who were diagnosed as having anaphylaxis</i>          |                                |                |             |                                 |                |             |
| ALL TRIGGERS                                                                                            | 30                             | 19             | 49          | 26,578                          | 7,164          | 33,742      |
| FOOD TRIGGERS                                                                                           | 14                             |                | 33          | 3,499                           |                | 10,663      |
| VENOM TRIGGERS                                                                                          | 3                              | -              | 3           | 284                             | -              | 284         |
| <i>Proportion of anaphylaxis treated with multiple epinephrine doses</i>                                |                                |                |             |                                 |                |             |
| ALL TRIGGERS                                                                                            | 66                             | 22             | 88          | 34,121                          | 2,436          | 36,557      |
| FOOD TRIGGERS                                                                                           | 38                             |                | 60          | 10,179                          |                | 12,615      |
| VENOM TRIGGERS                                                                                          | 20                             | -              | 20          | 3,194                           | -              | 3,194       |
| <i>Cardiorespiratory reactions treated with multiple epinephrine doses</i>                              |                                |                |             |                                 |                |             |
| ALL TRIGGERS                                                                                            | 49                             | 16             | 65          | 16,960                          | 1,469          | 18,429      |
| FOOD TRIGGERS                                                                                           | 20                             |                | 36          | 4,397                           |                | 5,866       |
| VENOM TRIGGERS                                                                                          | 10                             | -              | 10          | 2,128                           | -              | 2,128       |
| <i>Epinephrine-treated reactions where multiple epinephrine doses were administered</i>                 |                                |                |             |                                 |                |             |
| ALL TRIGGERS                                                                                            | 66                             | 22             | 88          | 16,985                          | 1,453          | 18,438      |
| FOOD TRIGGERS                                                                                           | 37                             |                | 59          | 5,616                           |                | 7,069       |
| VENOM TRIGGERS                                                                                          | 19                             | -              | 19          | 725                             | -              | 725         |
| <i>Anaphylaxis reactions treated with multiple epinephrine doses by a healthcare professional (HCP)</i> |                                |                |             |                                 |                |             |
| ALL TRIGGERS                                                                                            | 43                             | 20             | 63          | 20,342                          | 2,381          | 22,723      |
| FOOD TRIGGERS                                                                                           | 27                             |                | 47          | 9,061                           |                | 11,442      |
| VENOM TRIGGERS                                                                                          | 15                             | -              | 15          | 3,067                           | -              | 3,067       |
| <i>Epinephrine-treated reactions with multiple epinephrine doses administered by a HCP</i>              |                                |                |             |                                 |                |             |
| ALL TRIGGERS                                                                                            | 43                             | 20             | 63          | 9,499                           | 1,438          | 10,937      |
| FOOD TRIGGERS                                                                                           | 27                             |                | 47          | 4,803                           |                | 6,241       |
| VENOM TRIGGERS                                                                                          | 15                             | -              | 15          | 666                             | -              | 666         |



### C. Breakdown of the percentage of reactions in each dataset by trigger (for ALL Cause Anaphylaxis analyses)

For the ALL Trigger meta-analyses, this table lists the percentage of total reactions caused by food, venom, drug or other triggers.

Table S5. Proportion of reactions (by aetiology) in each dataset

| Reference                 | Percentage of food, venom, drug and other/unknown triggers contributing to each dataset within meta-analysis |           |          |                   | N (all reactions) |
|---------------------------|--------------------------------------------------------------------------------------------------------------|-----------|----------|-------------------|-------------------|
|                           | Food (%)                                                                                                     | Venom (%) | Drug (%) | Unknown/Other (%) |                   |
| Abrams et al, 2017        | 100                                                                                                          | 0         | 0        | 0                 | 104               |
| Alqurashi et al, 2015     | 70                                                                                                           | 2         | 2        | 26                | 484               |
| Anvari S et al, 2019      | 48                                                                                                           | 11        | 12       | 29                | 275               |
| Arana et al, 2009         | 81                                                                                                           | -         | -        | 19                | 47                |
| Arkwright, 2009           | 100                                                                                                          | 0         | 0        | 0                 | 22                |
| Asami et al, 2016         | 100                                                                                                          | 0         | 0        | 0                 | 30                |
| Banerji et al, 2010       | 100                                                                                                          | 0         | 0        | 0                 | 486               |
| Ben-Shoshan et al, 2013   | 85                                                                                                           | 4         | 3        | 9                 | 168               |
| Brennan et al, 2013       | 100                                                                                                          | 0         | 0        | 0                 | 22                |
| Brough et al, 2020        | 100                                                                                                          | 0         | 0        | 0                 | 238               |
| Brown et al, 2013         | 36                                                                                                           | 21        | -        | -                 | 315               |
| Campbell et al, 2015      | 36                                                                                                           | 12        | 19       | 33                | 582               |
| Capps and Arkwright, 2010 | 28                                                                                                           | 7         | 52       | 14                | 488               |
| Capucilli et al, 2019     | 100                                                                                                          | 0         | 0        | 0                 | 168               |
| Capucilli et al, 2021     | 100                                                                                                          | 0         | 0        | 0                 | 746               |
| Cardona et al, 2017       | 55                                                                                                           | 2         | 32       | 10                | 268               |
| Chatelier et al, 2019     | 52                                                                                                           | -         | -        | 48                | 174               |
| Chung et al, 2014         | 47                                                                                                           | 7         | 16       | 29                | 136               |
| Cohen et al, 2019         | 85                                                                                                           | 2         | -        | 13                | 375               |
| Coutinho et al, 2018      | 75                                                                                                           | 3         | 16       | 6                 | 32                |
| Coutinho et al, 2019      | 21                                                                                                           | 23        | 33       | 23                | 43                |
| De Swert et al, 2008      | 75                                                                                                           | 6         | 8        | 11                | 64                |
| Dibs and Baker, 1997      | 25                                                                                                           | 15        | 18       | 42                | 55                |
| Dogru et al, 2017         | 38                                                                                                           | 33        | 21       | 0                 | 66                |
| Dribin et al, 2019        | 58                                                                                                           | 1         | 6        | 34                | 665               |
| Elizur et al, 2018        | 100                                                                                                          | 0         | 0        | 0                 | 93                |
| Ellis et al, 2007         | 40                                                                                                           | 22        | 16       | 23                | 134               |
| Ewan and Clark, 2001      | 100                                                                                                          | 0         | 0        | 0                 | 26                |
| Ewan and Clark, 2005      | 100                                                                                                          | 0         | 0        | 0                 | 27                |
| Ewan and Clark, 2008      | 100                                                                                                          | 0         | 0        | 0                 | 269               |
| Ewan and Clark, 2008      | 100                                                                                                          | 0         | 0        | 0                 | 22                |
| Farias Aquino et al, 2013 | 14                                                                                                           | 14        | -        | -                 | 203               |
| Gabrielli et al, 2019     | 79                                                                                                           | 2         | 5        | 13                | 3498              |
| Giclas et al, 2019        | 100                                                                                                          | 0         | 0        | 0                 | 70                |
| Goh et al, 2018           | 56                                                                                                           | 6         | -        | 37                | 366               |
| Gold and Sainsbury, 2000  | 49                                                                                                           | 27        | 0        | 24                | 45                |
| Grabenhenrich et al, 2018 | 39                                                                                                           | 33        | 18       | 10                | 8187              |
| Hamilton et al, 2019      | 100                                                                                                          | 0         | 0        | 0                 | 47                |
| Hsiao et al, 2014         | 100                                                                                                          | 0         | 0        | 0                 | 306               |
| Huang et al, 2012         | 71                                                                                                           | -         | 9        | 20                | 213               |

|                            |     |     |    |    |      |
|----------------------------|-----|-----|----|----|------|
| Inoue and Yamamoto, 2013   | 92  | 0   | 2  | 7  | 61   |
| Itazawa et al, 2013        | 100 | 0   | 0  | 0  | 531  |
| Jarvinen et al, 2008       | 100 | 0   | 0  | 0  | 95   |
| Jarvinen et al, 2009       | 100 | 0   | 0  | 0  | 436  |
| Johnson et al, 2014        | 100 | 0   | 0  | 0  | 703  |
| Kahveci et al, 2020        | 100 | 0   | 0  | 0  | 175  |
| Kim et al, 2018            | 27  | 10  | 56 | 7  | 194  |
| Kondo et al, 2018          | 32  | 63  | 3  | 1  | 68   |
| Lee and Stukus, 2015       | 84  | 0   | 4  | 12 | 408  |
| Lee et al, 2013            | 100 | 0   | 0  | 0  | 310  |
| Lee et al, 2017            | 35  | 12  | 25 | 27 | 872  |
| Liu et al, 2019            | 38  | 15  | 19 | 28 | 430  |
| Manivannan et al, 2009     | 33  | 19  | 14 | 35 | 208  |
| Manivannan et al, 2014     | 28  | 12  | 31 | 29 | 103  |
| Maris et al, 2015          | 74  | 3   | 6  | 17 | 113  |
| Mehr et al, 2009           | 82  | 4   | 7  | 7  | 107  |
| Mulligan et al, 2014       | 100 | 0   | 0  | 0  | 150  |
| Muramatsu et al, 2020      | 21  | -   | -  | 79 | 9079 |
| Murata et al,2020          | -   | -   | -  | -  | 271  |
| Nagakura et al, 2018       | 100 | 0   | 0  | 0  | 25   |
| Nogic et al, 2016          | 75  | 4   | 6  | 15 | 52   |
| Noimark et al, 2012        | 91  | 0   | 2  | 6  | 245  |
| Noone et al, 2015          | 100 | 0   | 0  | 0  | 74   |
| Olabarri et al, 2019       | -   | -   | -  | -  | 453  |
| Oren et al, 2007           | 100 | 0   | 0  | 0  | 19   |
| Oya et al, 2020            | 76  | -   | 15 | 9  | 302  |
| Ponce Guevara et al, 2018  | 43  | 9   | 34 | 15 | 89   |
| Rudders et al, 2010        | 0   | 100 | 0  | 0  | 153  |
| Rudders et al, 2012        | 50  | 3   |    | 47 | 321  |
| Rueter et al, 2018         | 64  | 16  | 3  | 18 | 251  |
| Soller et al, 2019         | 100 | 0   | 0  | 0  | 55   |
| Sundquist et al, 2019      | 60  | 3   | 21 | 16 | 267  |
| Tiyyagura et al, 2014      | 76  | 1   | 8  | 16 | 218  |
| Topal et al, 2014          | 18  | 18  | 62 | 3  | 34   |
| Trainor et al, 2020        | 86  | 0.5 | 3  | -  | 414  |
| Tsuang et al, 2018         | 100 | 0   | 0  | 0  | 221  |
| Tsuang et al, 2018         | 100 | 0   | 0  | 0  | 14   |
| Turner et al, 2013         | 100 | 0   | 0  | 0  | 86   |
| Tyquin et al, 2017         | 58  | 10  | -  | -  | 161  |
| Uguz et al, 2005           | 100 | 0   | 0  | 0  | 126  |
| Van Der Valk et al, 2016   | 100 | 0   | 0  | 0  | 137  |
| Vijaykumar et al, 2017     | 100 | 0   | 0  | 0  | 24   |
| Villafana-Soto et al, 2011 | 100 | 0   | 0  | 0  | 88   |
| Webb and Lieberman, 2004   | 22  | 0   | 11 | 67 | 601  |
| White et al, 2015          | 62  | -   | -  | -  | 852  |
| Yanagida et al, 2017       | 100 | 0   | 0  | 0  | 190  |
| Yanagida et al, 2018       | 100 | 0   | 0  | 0  | 334  |
| Zubrinich et al, 2019      | 44  | 0   | 29 | 0  | 48   |

## D. Risk of Bias Tables

For all included references the table below lists the risk of bias assessment.

Table S6: Risk of Bias assessment for all datasets (N=78) ED: emergency department, FC: food challenge, FT: full-text, ABS: Abstract

| Reference                 | Study Setting      | Type of Study  | Full Text or Abstract | Risk of Bias: Anaphylaxis Definition | Risk of Bias: Epinephrine Methodology | Risk of Bias: Completeness of Data | Risk of Bias: Representative data | Overall Risk of Bias Assessment |
|---------------------------|--------------------|----------------|-----------------------|--------------------------------------|---------------------------------------|------------------------------------|-----------------------------------|---------------------------------|
| Abrams et al, 2017        | ROUTINE FC         | Food Challenge | FT                    | 0                                    | 0                                     | 0                                  | 0                                 | LOW                             |
| Alqurashi et al, 2015     | ED                 | Acute.retro    | FT                    | 0                                    | 0                                     | 0                                  | 0                                 | LOW                             |
| Anagnostou et al, 2019    | ED                 | Acute.retro    | FT                    | 0                                    | 1                                     | 0                                  | 0                                 | MODERATE                        |
| Arana et al, 2009         | CLINIC CASE SERIES | Clinic         | ABS                   | 0                                    | 0                                     | 0                                  | 0                                 | LOW                             |
| Arkwright, 2009           | SURVEY             | Survey         | FT                    | 0                                    | 0                                     | 0                                  | 1                                 | MODERATE                        |
| Asaumi et al, 2016        | ROUTINE FC         | Food Challenge | FT                    | 0                                    | 0                                     | 0                                  | 1                                 | MODERATE                        |
| Banerji et al, 2010       | ED                 | Acute.retro    | ABS                   | 0                                    | 1                                     | 0                                  | 0                                 | MODERATE                        |
| Ben-Shoshan et al, 2013   | ED                 | Acute.prosp    | FT                    | 0                                    | 0                                     | 0                                  | 0                                 | LOW                             |
| Brennan et al, 2013       | ROUTINE FC         | Food Challenge | ABS                   | 0                                    | 0                                     | 1                                  | 0                                 | MODERATE                        |
| Brown et al, 2013         | ED                 | Acute.prosp    | FT                    | 0                                    | 0                                     | 0                                  | 1                                 | MODERATE                        |
| Campbell et al, 2015      | ED                 | Acute.retro    | FT                    | 0                                    | 0                                     | 0                                  | 0                                 | LOW                             |
| Capps and Arkwright, 2010 | PREHOSP            | Acute.retro    | FT                    | 0                                    | 0                                     | 1                                  | 0                                 | MODERATE                        |
| Cardona et al, 2017       | REGISTRY           | Clinic         | FT                    | 0                                    | 0                                     | 0                                  | 1                                 | MODERATE                        |
| Chung et al, 2014         | PREHOSP            | Acute.retro    | FT                    | 0                                    | 0                                     | 1                                  | 0                                 | LOW                             |
| Coutinho et al, 2018      | ED                 | Acute.retro    | FT                    | 0                                    | 0                                     | 1                                  | 0                                 | MODERATE                        |
| Coutinho et al, 2019      | ED                 | Acute.retro    | FT                    | 0                                    | 0                                     | 0                                  | 0                                 | LOW                             |
| De Swert et al, 2008      | CLINIC CASE SERIES | Clinic         | FT                    | 0                                    | 0                                     | 0                                  | 0                                 | LOW                             |
| Dibs and Baker, 1997      | CLINIC CASE SERIES | Acute.retro    | FT                    | 0                                    | 0                                     | 0                                  | 1                                 | MODERATE                        |
| Dogru et al, 2017         | CLINIC CASE SERIES | Clinic         | FT                    | 0                                    | 0                                     | 0                                  | 0                                 | LOW                             |
| Dribin et al, 2019        | ED                 | Acute.retro    | FT                    | 0                                    | 0                                     | 0                                  | 0                                 | LOW                             |
| Elizur et al, 2018        | RESEARCH FC        | Food Challenge | FT                    | 0                                    | 0                                     | 0                                  | 0                                 | LOW                             |
| Ellis et al, 2007         | ED                 | Acute.retro    | FT                    | 0                                    | 0                                     | 0                                  | 0                                 | LOW                             |
| Ewan and Clark, 2001      | CLINIC CASE SERIES | Clinic         | FT                    | 0                                    | 0                                     | 1                                  | 0                                 | MODERATE                        |
| Ewan and Clark, 2005      | CLINIC CASE SERIES | Clinic         | FT                    | 0                                    | 0                                     | 1                                  | 0                                 | MODERATE                        |
| Ewan and Clark, 2008      | CLINIC CASE SERIES | Clinic         | FT                    | 0                                    | 0                                     | 1                                  | 0                                 | MODERATE                        |
| Ewan and Clark, 2008      | CLINIC CASE SERIES | Clinic         | FT                    | 0                                    | 0                                     | 1                                  | 0                                 | MODERATE                        |
| Farias Aquino et al, 2013 | ED                 | Acute.retro    | ABS                   | 0                                    | 0                                     | 1                                  | 1                                 | MODERATE                        |
| Giclas et al, 2019        | ROUTINE FC         | Food Challenge | ABS                   | 0                                    | 0                                     | 0                                  | 0                                 | LOW                             |

|                           |                    |                |     |   |   |   |   |          |
|---------------------------|--------------------|----------------|-----|---|---|---|---|----------|
| Goh et al, 2018           | ED                 | Acute.retro    | FT  | 0 | 0 | 1 | 0 | MODERATE |
| Gold and Sainsbury, 2000  | SURVEY             | Survey         | FT  | 0 | 0 | 0 | 1 | MODERATE |
| Grabenherrich et al, 2018 | REGISTRY           | Clinic         | FT  | 0 | 0 | 0 | 0 | LOW      |
| Hamilton et al, 2019      | RESEARCH FC        | Food Challenge | ABS | 0 | 0 | 1 | 1 | MODERATE |
| Hsiao et al, 2014         | ROUTINE FC         | Food Challenge | ABS | 0 | 0 | 0 | 0 | LOW      |
| Huang et al, 2012         | ED                 | Acute.retro    | FT  | 0 | 0 | 0 | 0 | LOW      |
| Inoue and Yamamoto, 2013  | CLINIC CASE SERIES | Acute.retro    | FT  | 0 | 0 | 1 | 0 | MODERATE |
| Itazawa et al, 2013       | ROUTINE FC         | Food Challenge | FT  | 0 | 0 | 0 | 0 | LOW      |
| Jarvinen et al, 2008      | SURVEY             | Survey         | FT  | 1 | 1 | 0 | 0 | MODERATE |
| Jarvinen et al, 2009      | RESEARCH FC        | Food Challenge | FT  | 0 | 0 | 0 | 0 | LOW      |
| Johnson et al, 2014       | ED                 | Acute.retro    | FT  | 0 | 0 | 0 | 0 | LOW      |
| Kim et al, 2018           | ED                 | Acute.retro    | FT  | 0 | 0 | 0 | 0 | LOW      |
| Kondo et al, 2018         | PREHOSP            | Acute.retro    | FT  | 0 | 0 | 0 | 1 | MODERATE |
| Lee and Stukus, 2015      | ED+PREHOSP         | Acute.retro    | ABS | 0 | 0 | 0 | 0 | LOW      |
| Lee et al, 2012           | ROUTINE FC         | Food Challenge | FT  | 0 | 0 | 0 | 0 | LOW      |
| Lee et al, 2017           | ED                 | Acute.retro    | FT  | 0 | 0 | 0 | 0 | LOW      |
| Liu et al, 2019           | ED                 | Acute.prosp    | FT  | 0 | 0 | 0 | 0 | LOW      |
| Manivannan et al, 2009    | CLINIC CASE SERIES | Acute.retro    | FT  | 0 | 0 | 0 | 0 | LOW      |
| Manivannan et al, 2014    | PREHOSP            | Acute.prosp    | FT  | 0 | 0 | 0 | 0 | LOW      |
| Maris et al, 2015         | REGISTRY           | Acute.prosp    | ABS | 0 | 0 | 0 | 0 | LOW      |
| Mehr et al, 2009          | ED                 | Acute.retro    | FT  | 0 | 0 | 0 | 1 | MODERATE |
| Mulligan et al, 2014      | ROUTINE FC         | Food Challenge | ABS | 0 | 0 | 0 | 0 | LOW      |
| Nagakura et al, 2018      | RESEARCH FC        | Food Challenge | FT  | 0 | 0 | 0 | 1 | MODERATE |
| Nogic et al, 2016         | ED+PREHOSP         | Acute.retro    | FT  | 0 | 0 | 0 | 0 | LOW      |
| Noimark et al, 2012       | SURVEY             | Survey         | FT  | 0 | 0 | 0 | 0 | LOW      |
| Noone et al, 2015         | RESEARCH FC        | Food Challenge | FT  | 1 | 0 | 0 | 1 | MODERATE |
| Olabarri et al, 2019      | ED                 | Acute.prosp    | ABS | 0 | 0 | 0 | 0 | LOW      |
| Oren et al, 2007          | ED                 | Acute.retro    | FT  | 0 | 0 | 0 | 1 | MODERATE |
| Ponce Guevara et al, 2018 | ED                 | Acute.retro    | FT  | 0 | 0 | 0 | 0 | LOW      |
| Rudders et al, 2010       | ED                 | Acute.retro    | FT  | 0 | 0 | 0 | 0 | LOW      |
| Rudders et al, 2012       | ED                 | Acute.retro    | FT  | 0 | 0 | 1 | 1 | MODERATE |
| Rueter et al, 2018        | ED                 | Acute.retro    | FT  | 0 | 0 | 0 | 0 | LOW      |
| Soller et al, 2019        | ROUTINE FC         | Food Challenge | FT  | 0 | 0 | 0 | 0 | LOW      |
| Sundquist et al, 2019     | ED                 | Acute.retro    | FT  | 0 | 0 | 0 | 0 | LOW      |
| Tiyyagura et al, 2014     | ED                 | Acute.retro    | FT  | 0 | 0 | 0 | 0 | LOW      |

|                            |                    |                |     |   |   |   |   |          |
|----------------------------|--------------------|----------------|-----|---|---|---|---|----------|
| Topal et al, 2014          | CLINIC CASE SERIES | Acute.retro    | FT  | 1 | 0 | 0 | 1 | MODERATE |
| Tsuang et al, 2018         | CLINIC CASE SERIES | Clinic         | FT  | 1 | 1 | 0 | 0 | MODERATE |
| Tsuang et al, 2018         | CLINIC CASE SERIES | Clinic         | FT  | 1 | 0 | 1 | 1 | HIGH     |
| Turner et al, 2013         | ROUTINE FC         | Food Challenge | FT  | 0 | 0 | 0 | 1 | MODERATE |
| Tyquin et al, 2017         | CLINIC CASE SERIES | Clinic         | ABS | 0 | 0 | 0 | 0 | LOW      |
| Uguz et al, 2005           | SURVEY             | Survey         | FT  | 1 | 0 | 1 | 1 | HIGH     |
| Van Der Valk et al, 2016   | RESEARCH FC        | Food Challenge | FT  | 0 | 0 | 0 | 0 | LOW      |
| Vijaykumar et al, 2017     | ROUTINE FC         | Food Challenge | ABS | 1 | 0 | 0 | 0 | MODERATE |
| Villafana-Soto et al, 2011 | ROUTINE FC         | Food Challenge | ABS | 0 | 0 | 0 | 0 | LOW      |
| Webb and Lieberman, 2004   | CLINIC CASE SERIES | Clinic         | FT  | 1 | 0 | 0 | 1 | MODERATE |
| White et al, 2015          | SURVEY             | Survey         | ABS | 1 | 0 | 0 | 0 | MODERATE |
| Yanagida et al, 2017       | RESEARCH FC        | Food Challenge | FT  | 0 | 0 | 0 | 0 | LOW      |
| Yanagida et al, 2018       | ROUTINE FC         | Food Challenge | ABS | 0 | 0 | 0 | 0 | LOW      |
| Zubrinich et al, 2019      | ED                 | Acute.retro    | FT  | 0 | 0 | 0 | 0 | LOW      |
| Brough et al, 2020         | RESEARCH FC        | Food Challenge | FT  | 1 | 0 | 0 | 1 | MODERATE |
| Capucilli et al, 2019      | ED                 | Acute.retro    | FT  | 0 | 0 | 0 | 0 | LOW      |
| Capucilli et al, 2021      | ROUTINE FC         | Food Challenge | FT  | 0 | 0 | 0 | 0 | LOW      |
| Chatelier et al, 2019      | ED                 | Acute.retro    | ABS | 0 | 0 | 0 | 0 | LOW      |
| Cohen et al, 2019          | ED                 | Acute.retro    | FT  | 0 | 0 | 0 | 0 | LOW      |
| Kahveci et al, 2020        | ED                 | Acute.retro    | FT  | 0 | 1 | 0 | 1 | MODERATE |
| Muramatsu et al, 2020      | ED                 | Acute.retro    | FT  | 1 | 0 | 1 | 0 | MODERATE |
| Murata et al,2020          | ED                 | Acute.retro    | FT  | 1 | 0 | 0 | 1 | MODERATE |
| Oya et al, 2020            | ED                 | Acute.prosp    | FT  | 0 | 0 | 0 | 0 | LOW      |
| Trainor et al, 2020        | ED                 | Acute.retro    | FT  | 0 | 0 | 0 | 0 | LOW      |

## E. Additional Pooled Estimates and Forest Plots

Table S7: Pooled Estimates for all sub-analyses by trigger and anaphylaxis definition

| Trigger                                                                                                         | ALL CAUSE         | FOOD              | VENOM             |
|-----------------------------------------------------------------------------------------------------------------|-------------------|-------------------|-------------------|
| <b>Proportion of patients with allergic reactions who were diagnosed as having anaphylaxis</b>                  |                   |                   |                   |
| Number of datasets (Overall estimate)                                                                           | 49                | 33                | 3                 |
| Accidental Reactions % Estimate (95%CI):                                                                        | 50.4 (37.8; 63.0) | 48.2 (34.7; 62.0) | 51.6 (25.8; 76.6) |
| Food Challenges % Estimate (95%CI):                                                                             | 31.8 (22.6; 42.7) | 31.8 (22.6; 42.7) | -                 |
| Overall % Estimate (95%CI):                                                                                     | 42.9 (34.0; 52.2) | 38.5 (30.1; 47.6) | 51.6 (25.8; 76.6) |
| Tau <sup>2</sup> ; I <sup>2</sup>                                                                               | 1.7457; 99.5%     | 1.1480; 97.3%     | 0.9142; 95.2%     |
| Subgroup Differences (Q value; p value)                                                                         | 4.85; 0.0276      | 3.43; 0.0639      | -                 |
| Corresponding Figure for Forest Plot                                                                            | Fig.S1            | Fig.S2            | Fig.S3            |
| <b>Proportion of anaphylaxis treated with multiple epinephrine doses</b>                                        |                   |                   |                   |
| Number of datasets (Overall estimate)                                                                           | 88                | 60                | 20                |
| Accidental Reactions % Estimate (95%CI):                                                                        | 8.0 (6.5; 9.7)    | 7.7 (5.8; 10.0)   | 10.5 (6.2; 17.1)  |
| Food Challenges % Estimate (95%CI):                                                                             | 6.5 (4.2; 9.8)    | 6.5 (4.2; 9.8)    | -                 |
| Overall % Estimate (95%CI):                                                                                     | 7.7 (6.4; 9.1)    | 7.3 (5.8; 9.1)    | 10.5 (6.2; 17.1)  |
| Tau <sup>2</sup> ; I <sup>2</sup>                                                                               | 0.6063; 93.6%     | 0.5806; 87.0%     | 0.9757; 88.3%     |
| Subgroup Differences (Q value; p value)                                                                         | 0.78; 0.3757      | 0.44; 0.5062      | -                 |
| Corresponding Figure for Forest Plot                                                                            | Fig.S4            | Fig.S5            | Fig.S6            |
| <b>Cardiorespiratory reactions treated with multiple epinephrine doses</b>                                      |                   |                   |                   |
| Number of datasets (Overall estimate)                                                                           | 65                | 36                | 10                |
| Accidental Reactions % Estimate (95%CI):                                                                        | 9.6 (7.6; 12.0)   | 9.1 (6.2; 13.1)   | 11.1 (4.3; 26.0)  |
| Food Challenges % Estimate (95%CI):                                                                             | 10.8 (6.0; 18.8)  | 10.8 (6.0; 18.8)  | -                 |
| Overall % Estimate (95%CI):                                                                                     | 9.8 (7.8; 12.2)   | 9.8 (7.0; 13.4)   | 11.1 (4.3; 26.0)  |
| Tau <sup>2</sup> ; I <sup>2</sup>                                                                               | 0.7432; 93.7%     | 0.8067; 90.7%     | 2.0096; 89.9%     |
| Subgroup Differences (Q value; p value)                                                                         | 0.14; 0.7055      | 0.25; 0.6172      | -                 |
| Corresponding Figure for Forest Plot                                                                            | Fig.S7            | Fig.S8            | Fig.S9            |
| <b>Epinephrine-treated reactions treated with multiple epinephrine doses</b>                                    |                   |                   |                   |
| Number of datasets (Overall estimate)                                                                           | 88                | 59                | 19                |
| Accidental Reactions % Estimate (95%CI):                                                                        | 13.5 (11.5; 15.9) | 12.3 (9.9; 15.2)  | 18.0 (13.2; 24.0) |
| Food Challenges % Estimate (95%CI):                                                                             | 10.6 (7.9; 14.1)  | 10.6 (7.9; 14.1)  | -                 |
| Overall % Estimate (95%CI):                                                                                     | 12.9 (11.2; 14.9) | 11.7 (9.9; 13.9)  | 18.0 (13.2; 24.0) |
| Tau <sup>2</sup> ; I <sup>2</sup>                                                                               | 0.3996; 88.1%     | 0.2999; 71.7%     | 0.2069; 51.7%     |
| Subgroup Differences (Q value; p value)                                                                         | 2.06; 0.1515      | 0.62; 0.4316      | -                 |
| Corresponding Figure for Forest Plot                                                                            | Fig.S10           | Fig.S11           | Fig.S12           |
| <b>Anaphylaxis reactions where multiple epinephrine doses were administered by a healthcare professional</b>    |                   |                   |                   |
| Number of datasets (Overall estimate)                                                                           | 63                | 47                | 15                |
| Accidental Reactions % Estimate (95%CI):                                                                        | 7.2 (5.7; 9.0)    | 7.1 (5.3; 9.5)    | 10.0 (5.1; 18.8)  |
| Food Challenges % Estimate (95%CI):                                                                             | 6.8 (4.4; 10.4)   | 6.8 (4.4; 10.4)   | -                 |
| Overall % Estimate (95%CI):                                                                                     | 7.1 (5.8; 8.7)    | 7.0 (5.5; 8.9)    | 10.0 (5.1; 18.8)  |
| Tau <sup>2</sup> ; I <sup>2</sup>                                                                               | 0.5418; 91.1%     | 0.5265; 86.3%     | 1.2887; 90.3%     |
| Subgroup Differences (Q value; p value)                                                                         | 0.05; 0.8205      | 0.03; 0.8743      | -                 |
| Corresponding Figure for Forest Plot                                                                            | Fig.S13           | Fig.S14           | Fig.S15           |
| <b>Epinephrine-treated reactions with multiple epinephrine doses administered by a health-care professional</b> |                   |                   |                   |
| Number of datasets (Overall estimate)                                                                           | 63                | 47                | 15                |
| Accidental Reactions % Estimate (95%CI):                                                                        | 12.8 (10.6; 15.4) | 11.3 (9.1; 14.0)  | 17.1 (11.3; 25.0) |
| Food Challenges % Estimate (95%CI):                                                                             | 10.8 (8.0; 14.4)  | 10.8 (8.0; 14.4)  | -                 |
| Overall % Estimate (95%CI):                                                                                     | 12.2 (10.4; 14.3) | 11.1 (9.4; 13.2)  | 17.1 (11.3; 25.0) |
| Tau <sup>2</sup> ; I <sup>2</sup>                                                                               | 0.3254; 80.9%     | 0.2117; 62.9%     | 0.3284; 60.1%     |
| Subgroup Differences (Q value; p value)                                                                         | 0.95; 0.3288      | 0.07; 0.7853      | -                 |
| Corresponding Figure for Forest Plot                                                                            | Fig.S16           | Fig.S17           | Fig.S18           |

Below are the corresponding forest plots for the meta-analyses listed in Table S7.

Figure S1. Proportion of patients with allergic reactions who were diagnosed as having anaphylaxis: all trigger

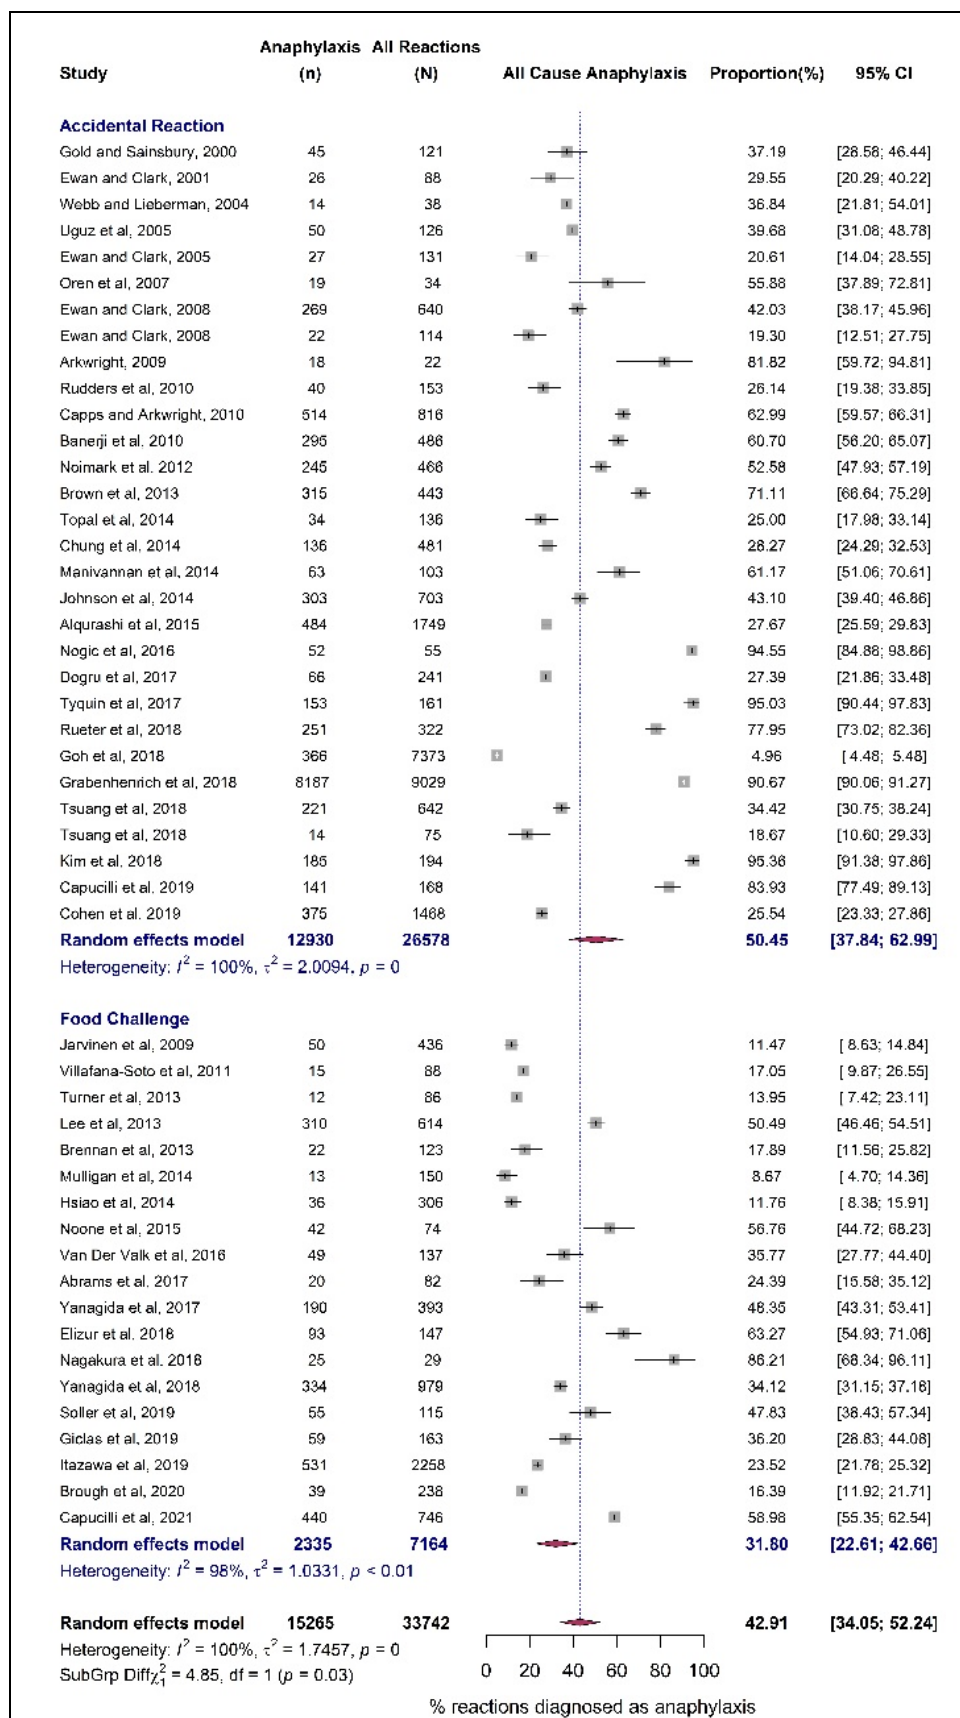

Figure S2. Proportion of patients with allergic reactions who were diagnosed as having anaphylaxis: food

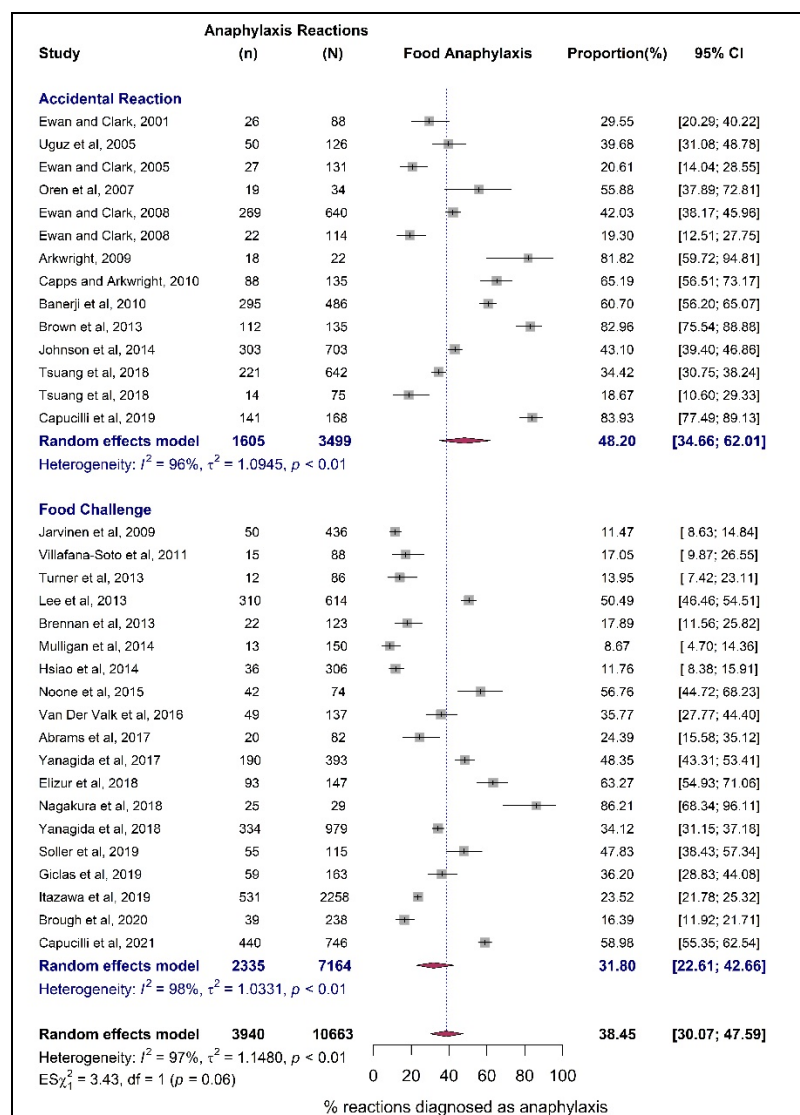

Figure S3. Proportion of patients with allergic reactions who were diagnosed as having anaphylaxis: venom

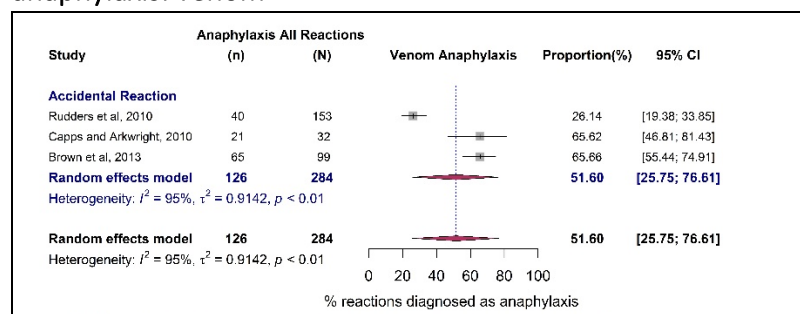



Figure S4. Proportion of anaphylaxis treated with multiple epinephrine doses: all trigger

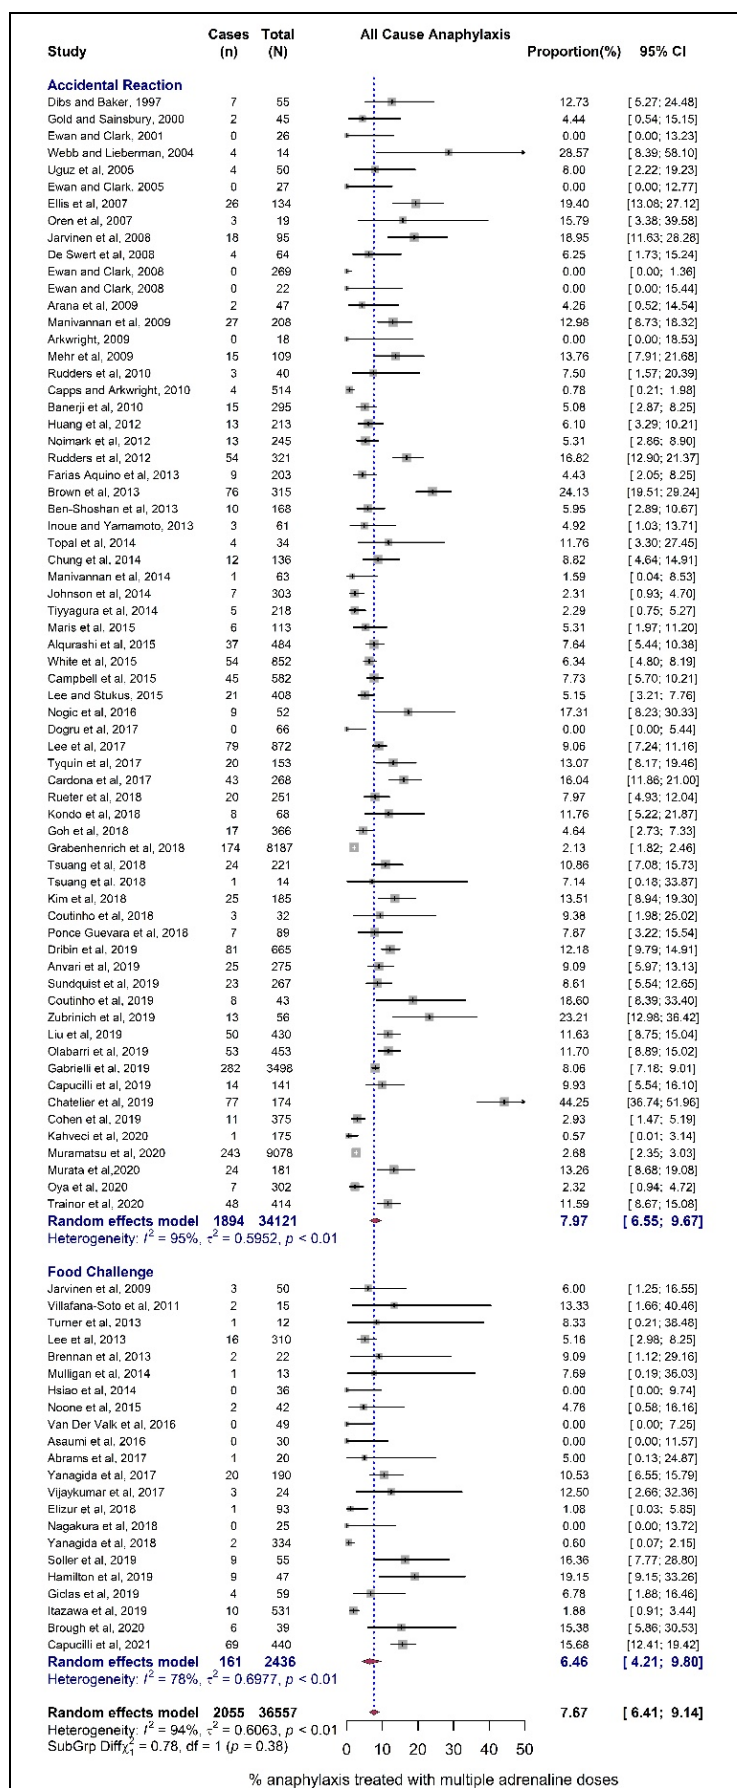

Figure S5. Proportion of anaphylaxis treated with multiple epinephrine doses: food

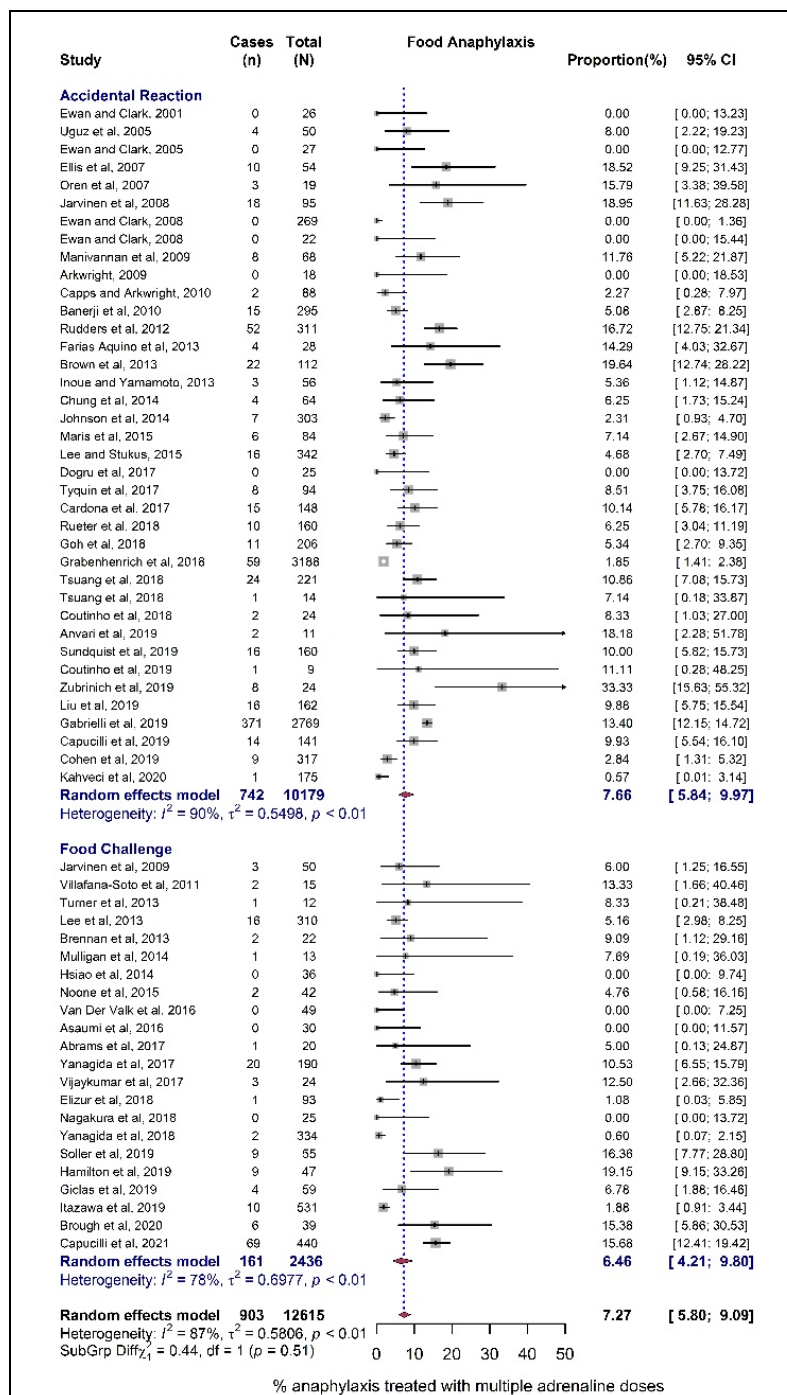

Figure S6. Proportion of anaphylaxis treated with multiple epinephrine doses: venom

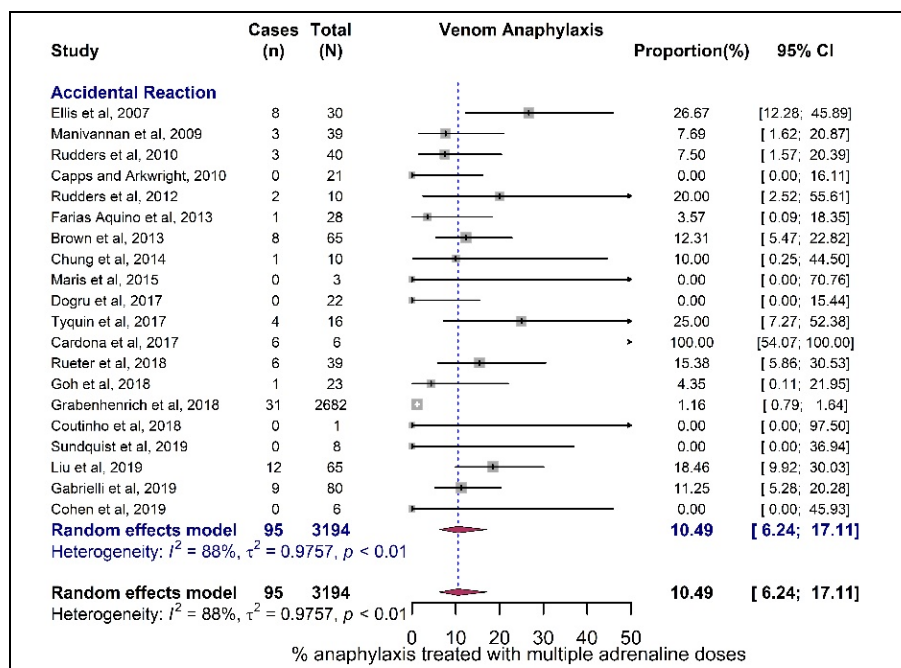

Figure S7. Cardiorespiratory reactions treated with multiple epinephrine doses: all triggers

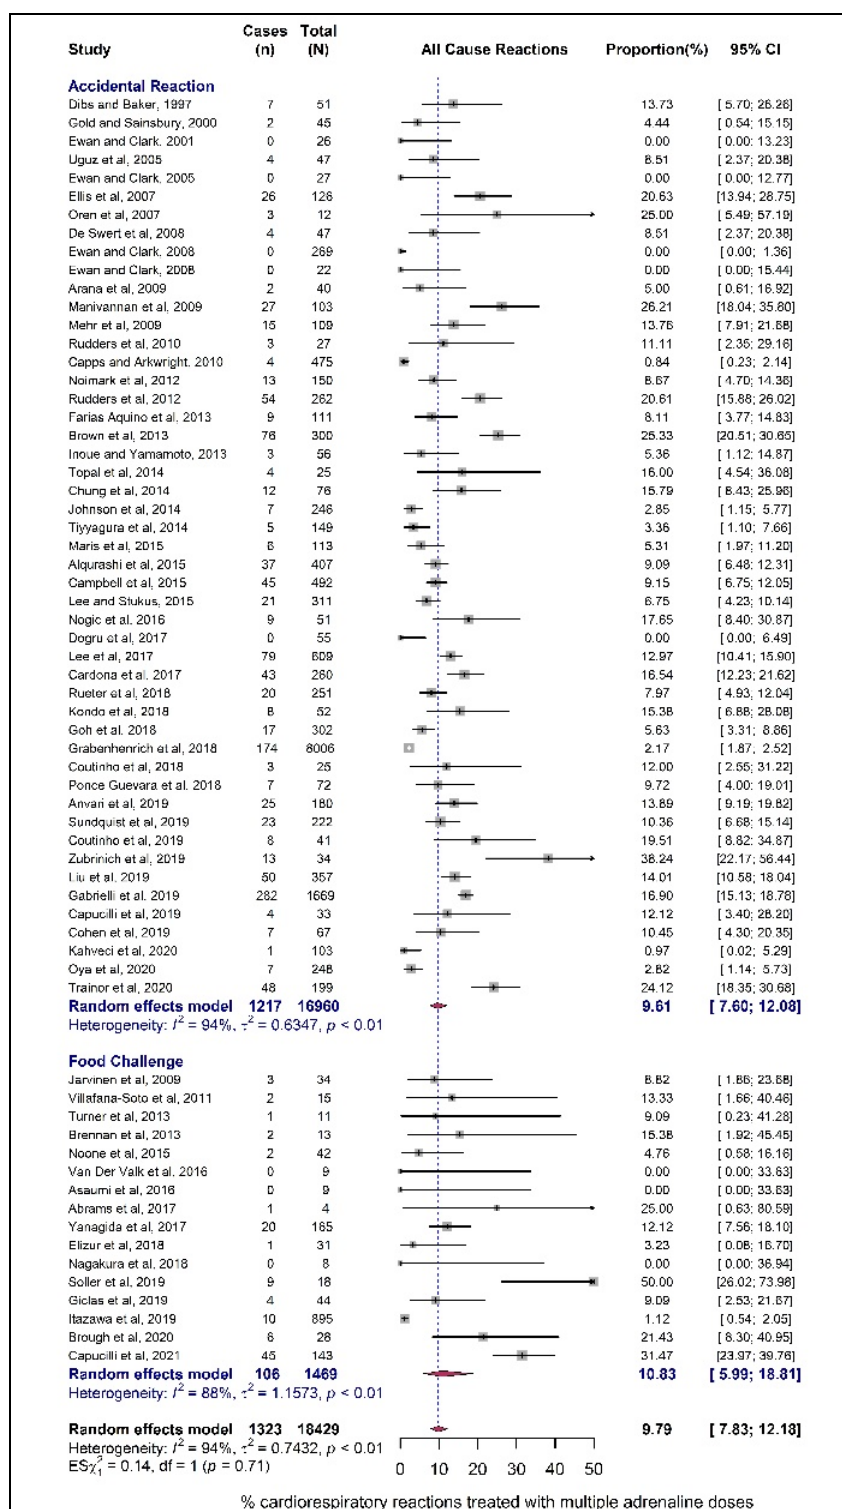

Figure S8. Cardiorespiratory reactions treated with multiple epinephrine doses: food

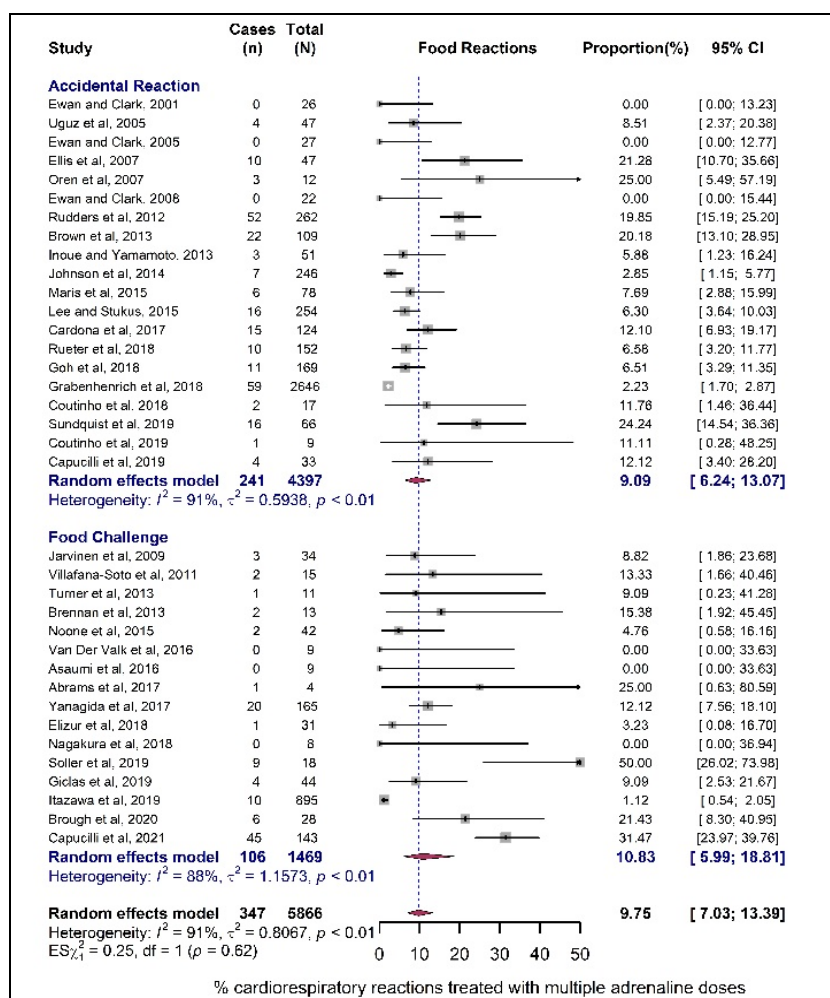

Figure S9. Cardiorespiratory reactions treated with multiple epinephrine doses: venom

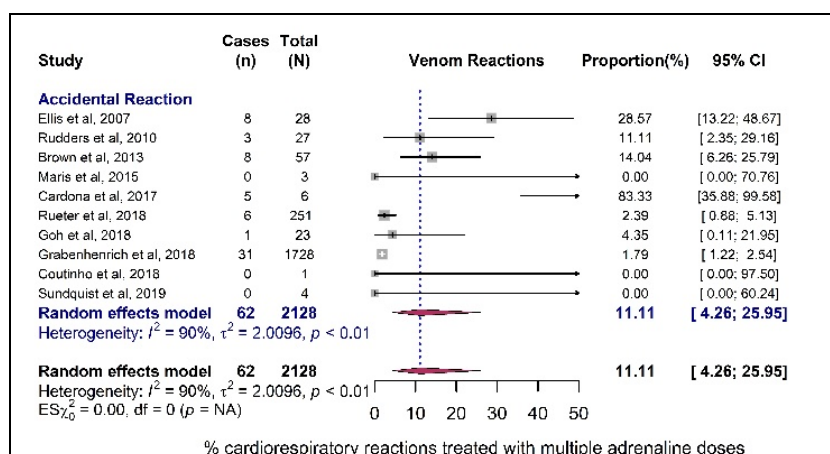

Figure S10. Epinephrine-treated reactions where multiple epinephrine doses were administered: all triggers

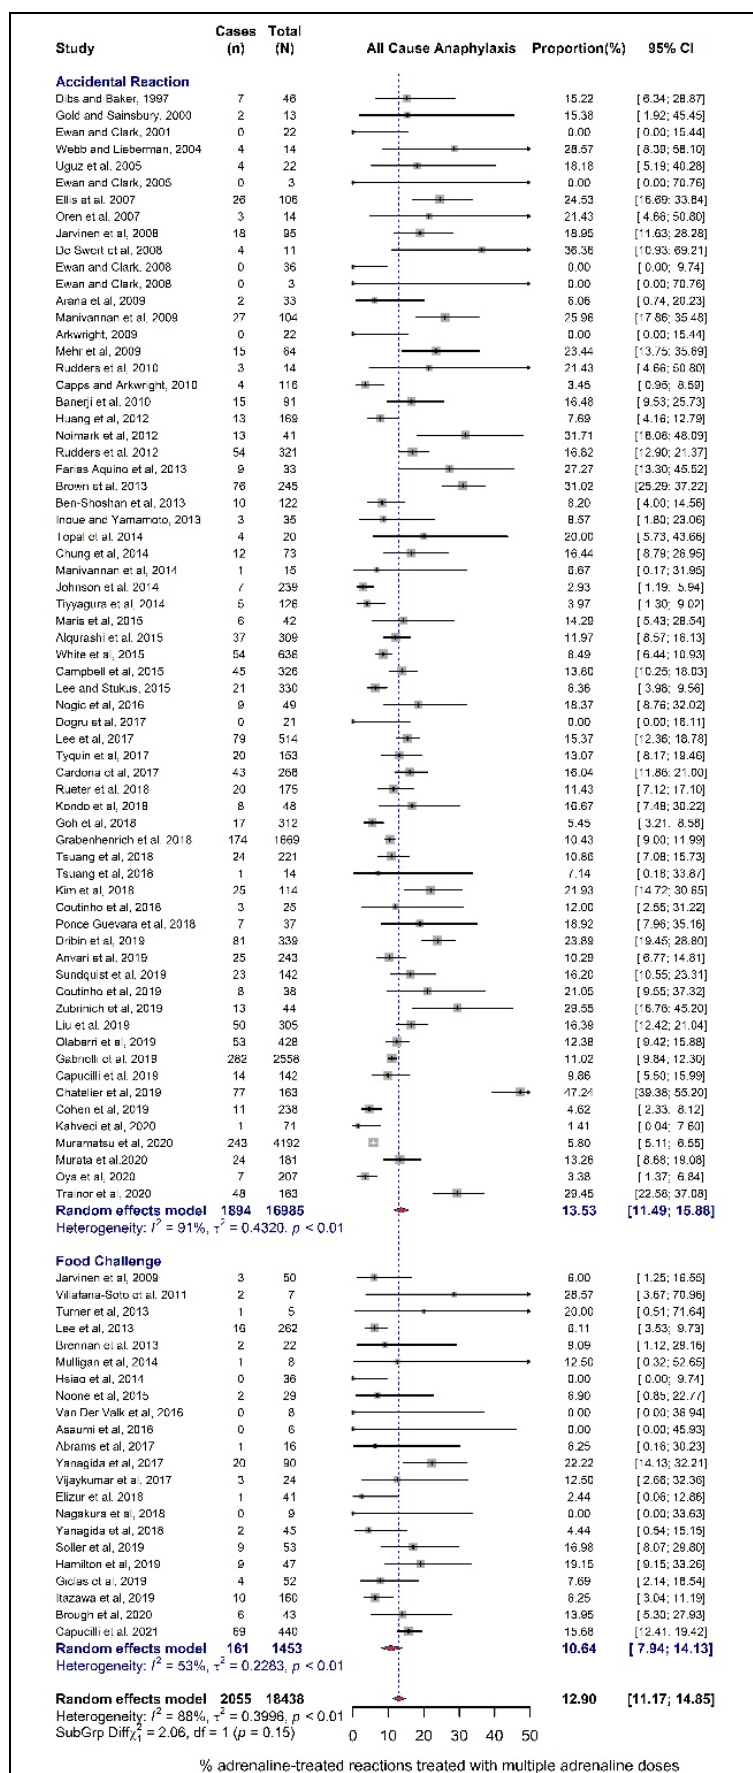

Figure S11. Epinephrine-treated reactions where multiple epinephrine doses were administered: food

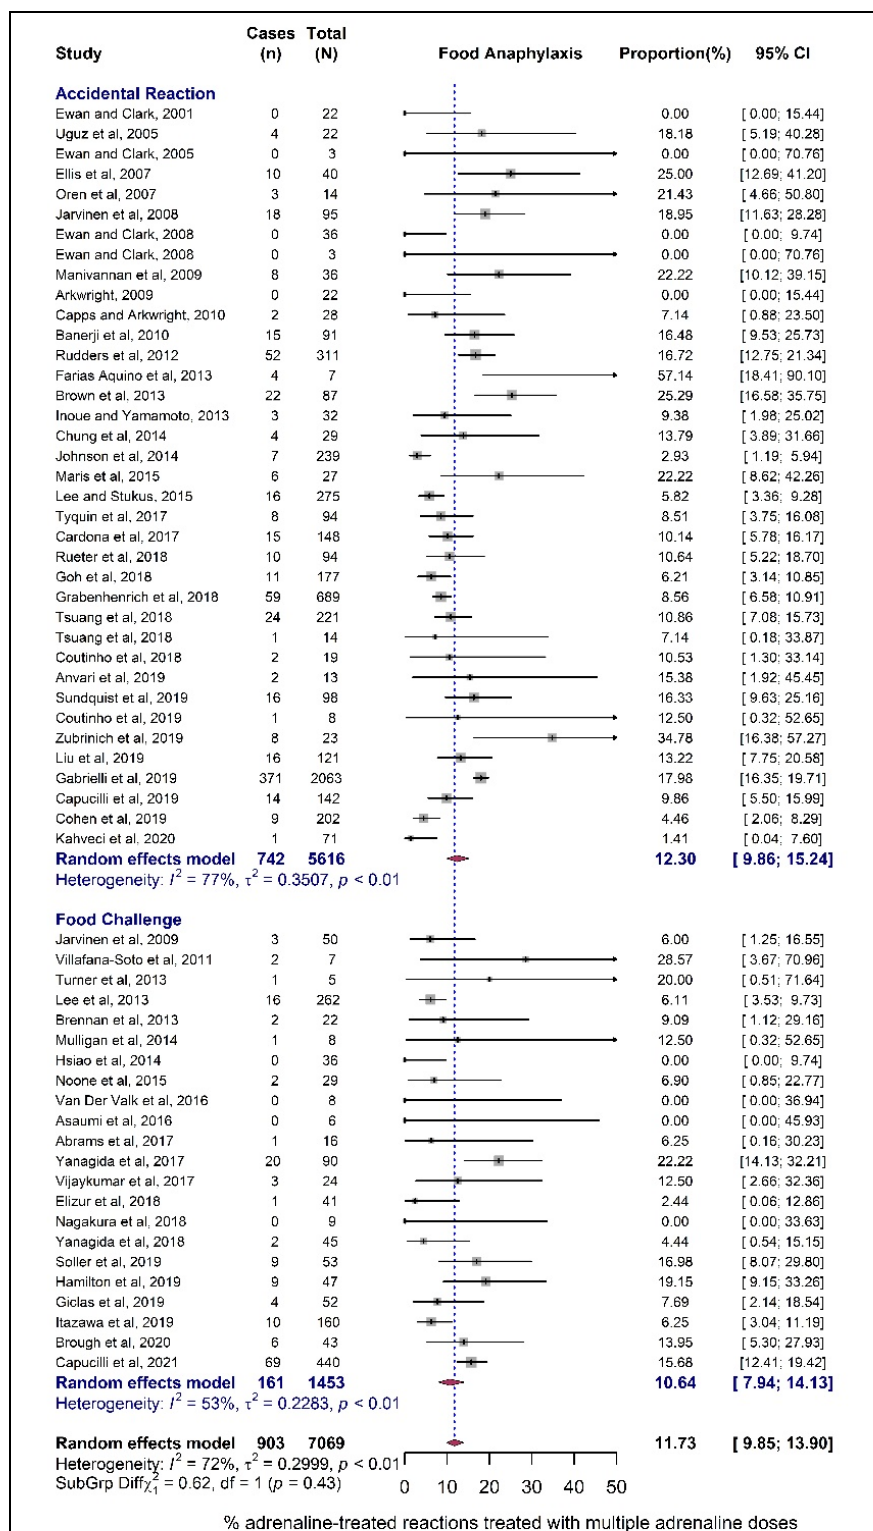

Figure S12. Epinephrine-treated reactions where multiple epinephrine doses were administered: venom

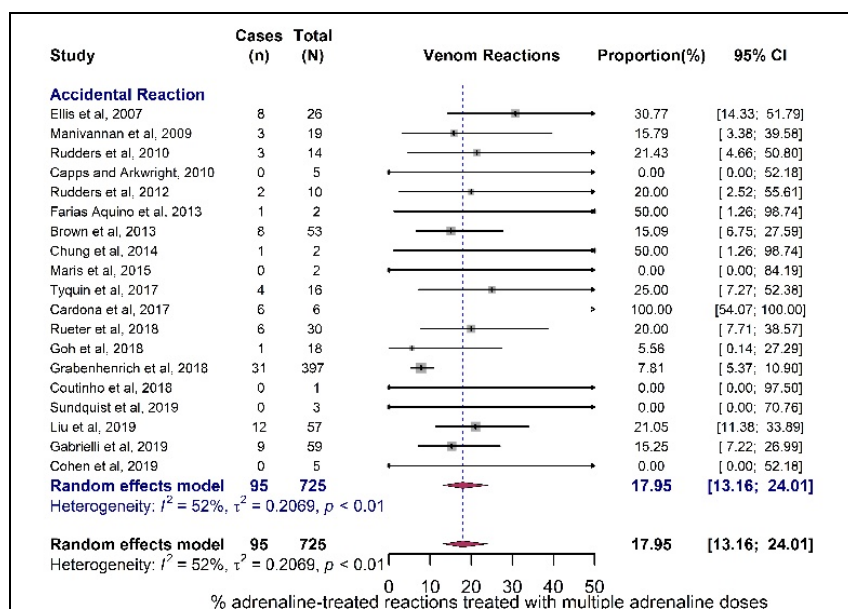



Figure S13. Anaphylaxis reactions treated with multiple epinephrine doses by a HCP: all trigger

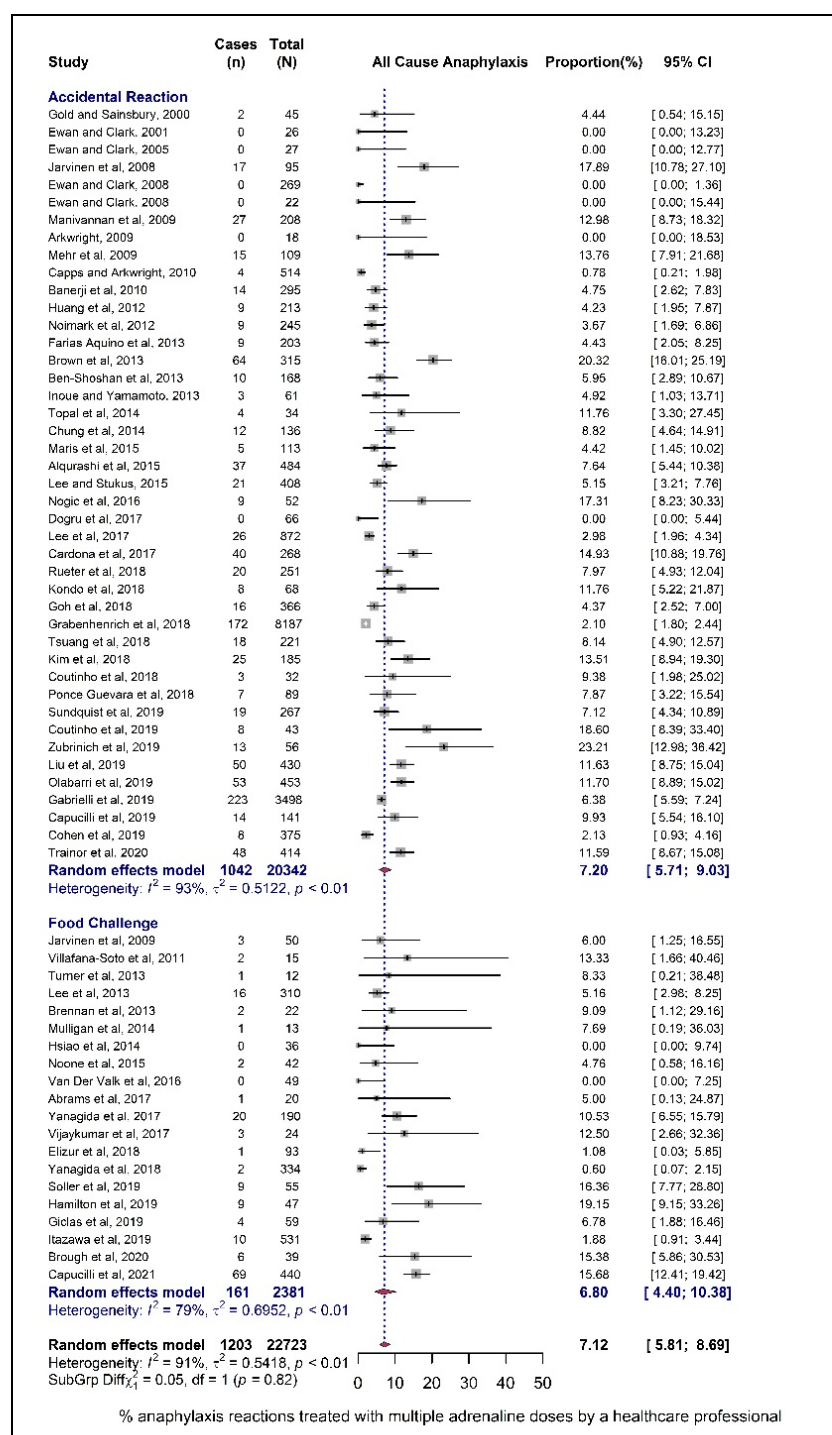

Figure S14. Anaphylaxis reactions treated with multiple epinephrine doses by a HCP: food

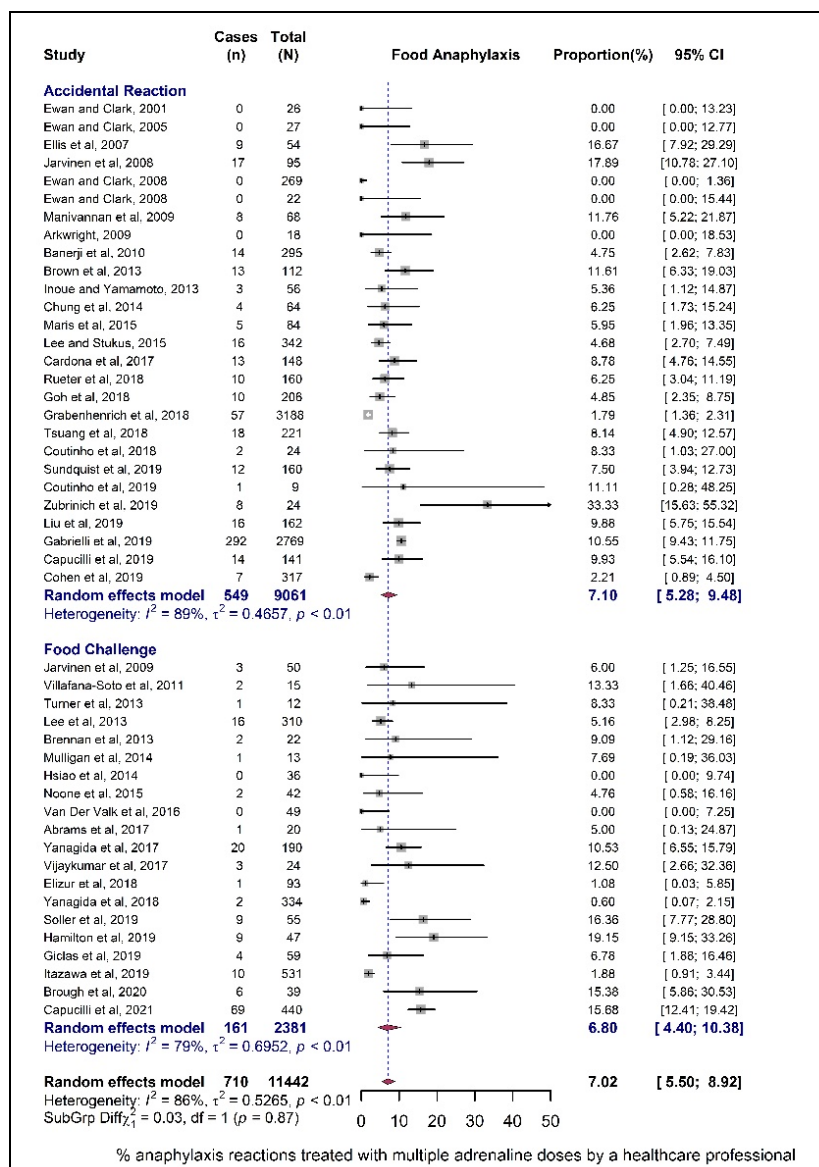

Figure S15. Anaphylaxis reactions treated with multiple epinephrine doses by a HCP: venom

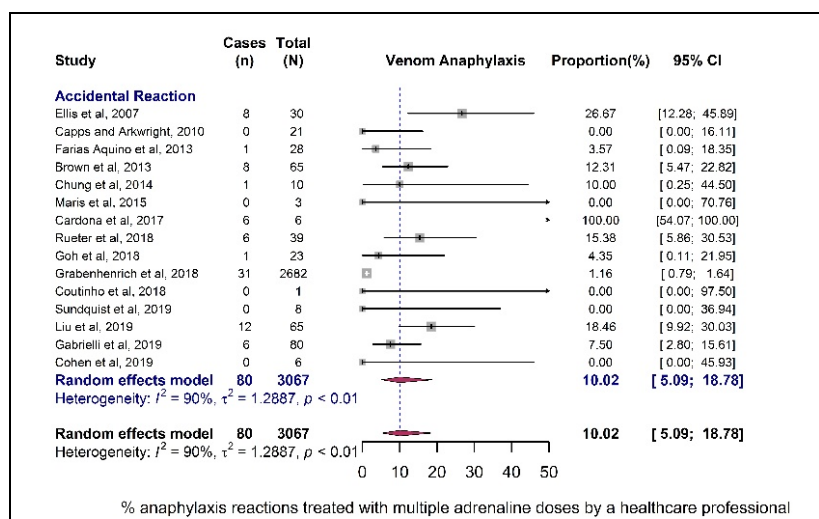

Figure S16. Epinephrine-treated reactions with multiple epinephrine doses administered by a health-care professional: all triggers

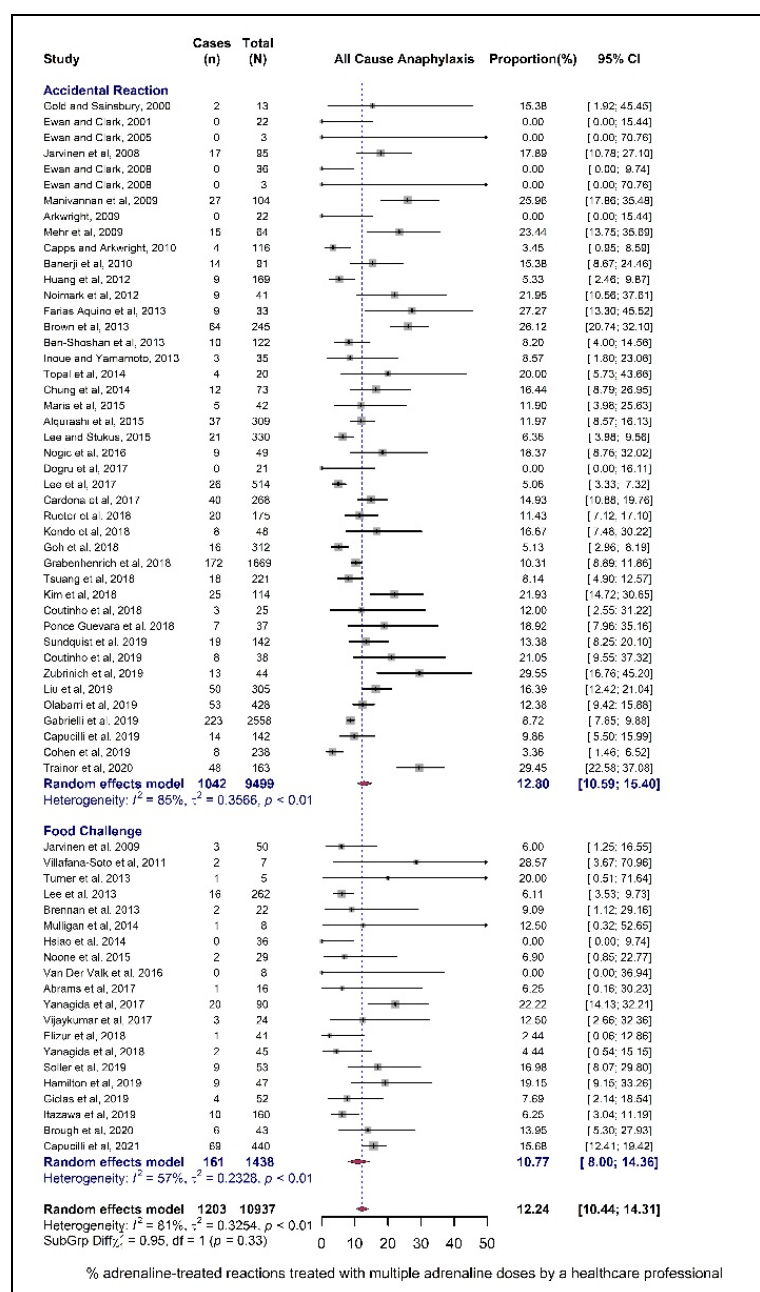

Figure S17. Epinephrine-treated reactions with subsequent epinephrine doses administered by a HCP: food

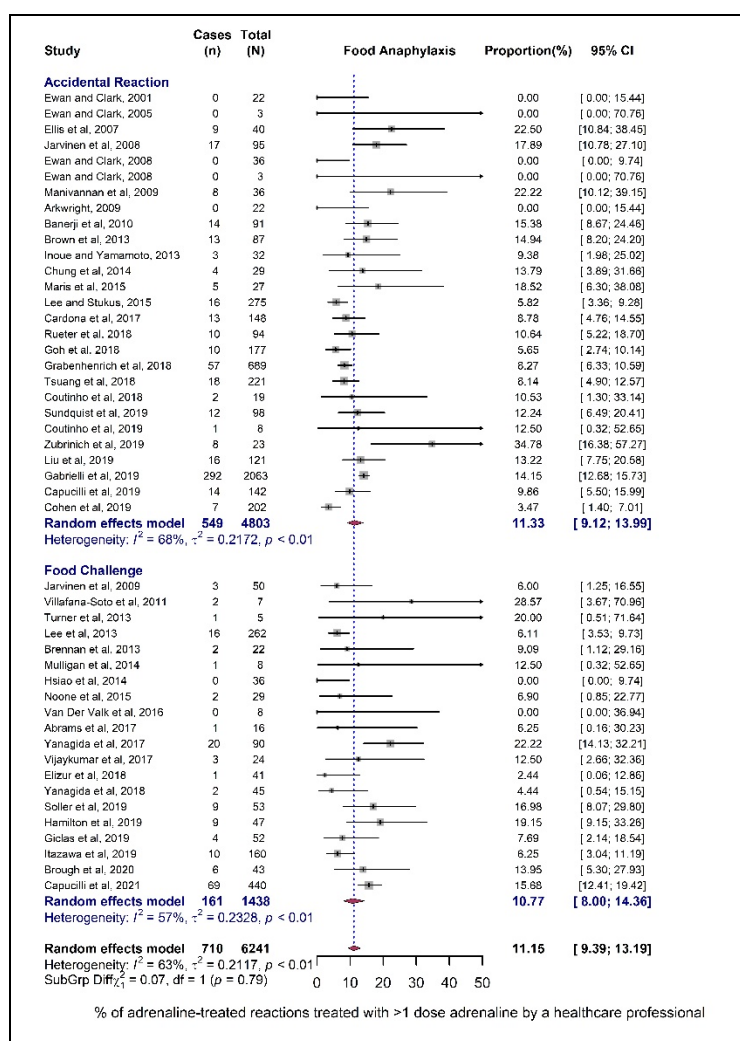

Figure S18. Epinephrine-treated reactions with subsequent epinephrine doses administered by a HCP: venom

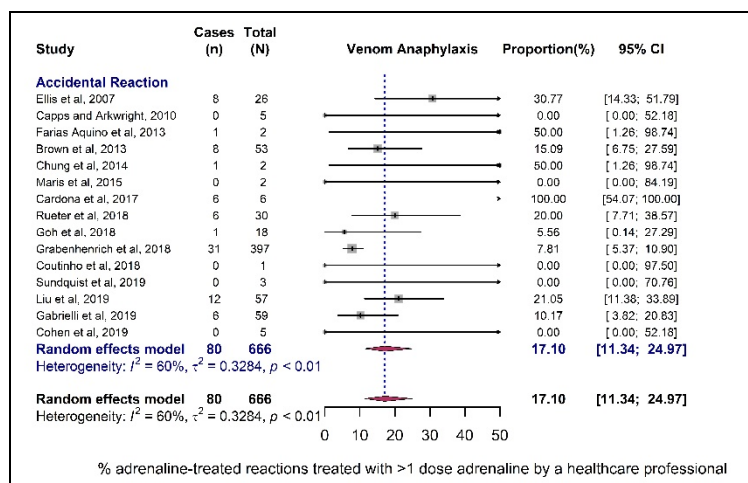

## F. Funnel Plots and Egger Tests

Figure S19: Funnel Plots for all metaanalyses: Assessment of small studies effect

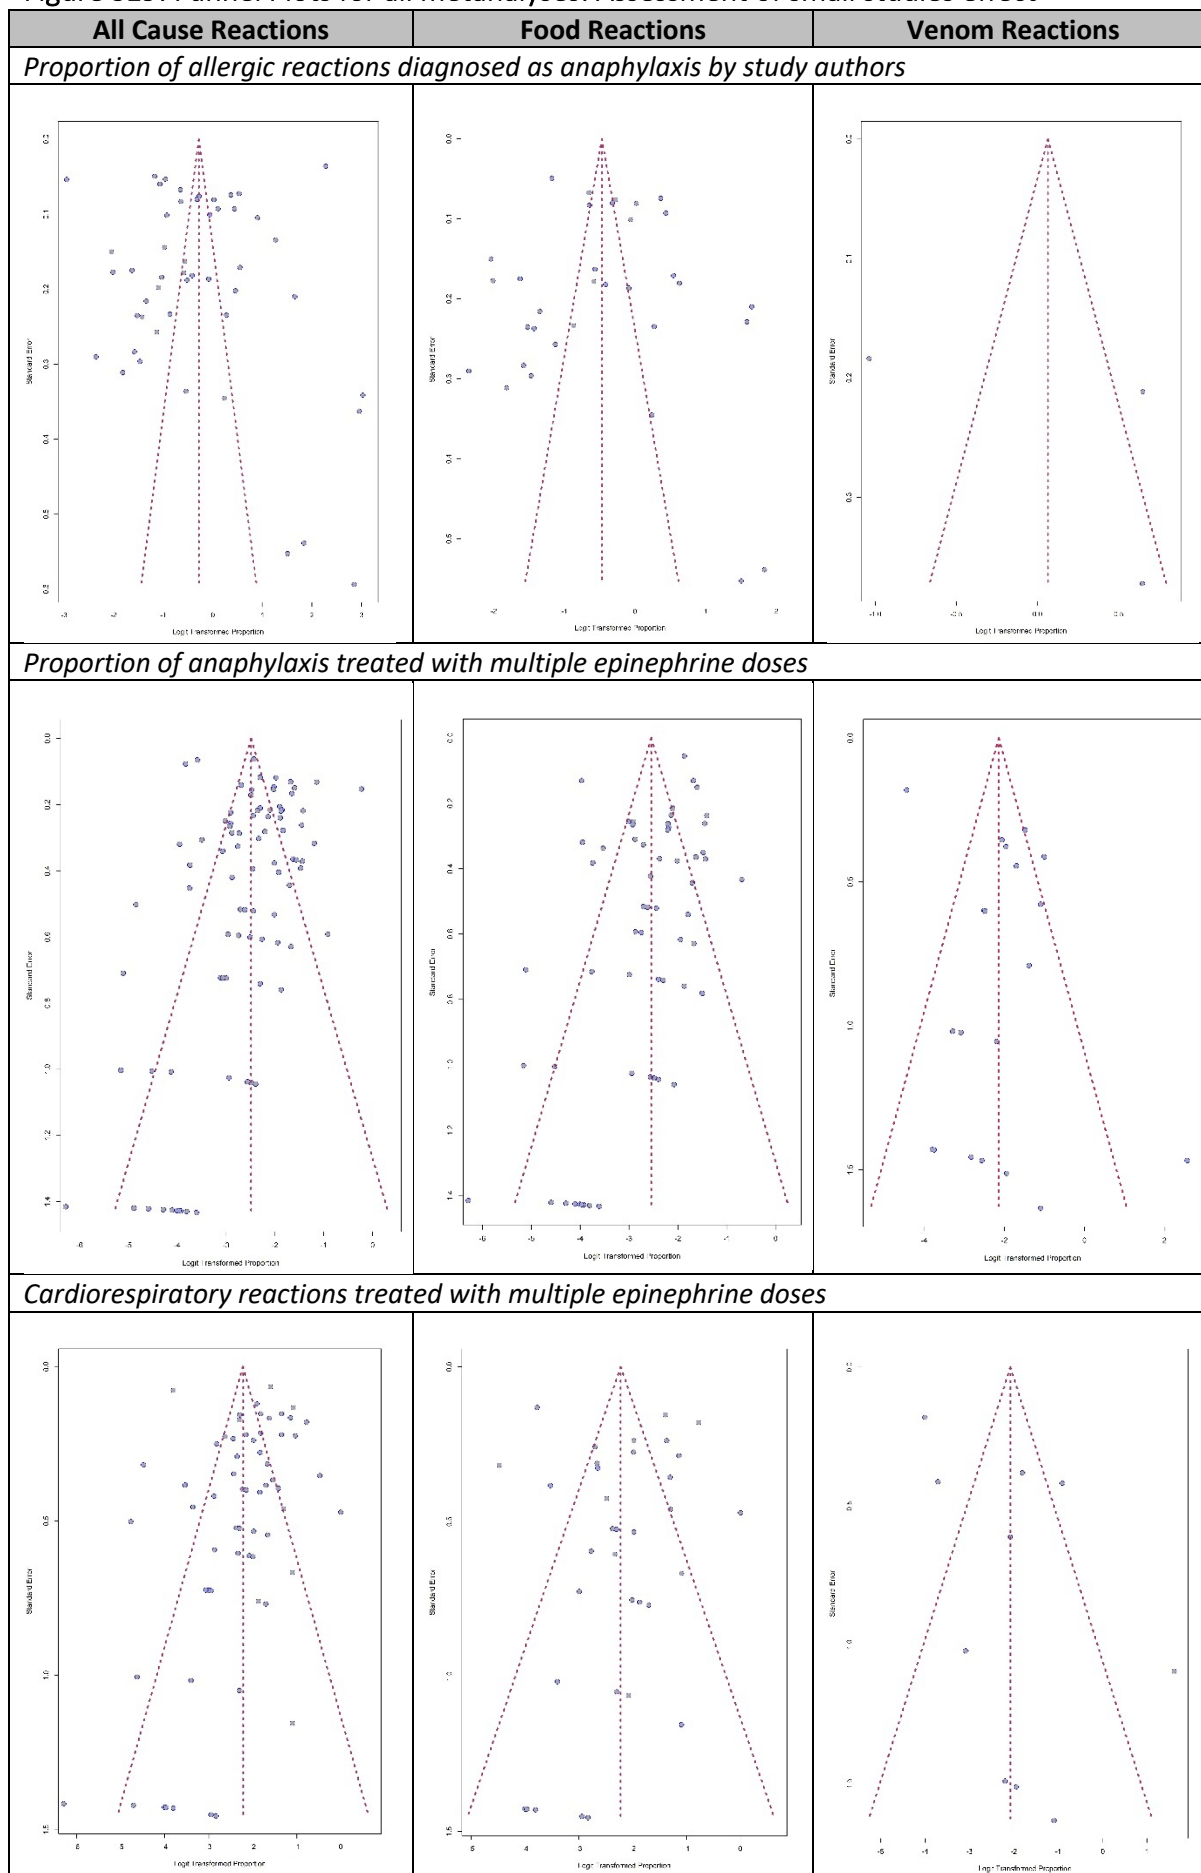

Funnel Plots for Assessment of small studies effect (publication bias) - continued

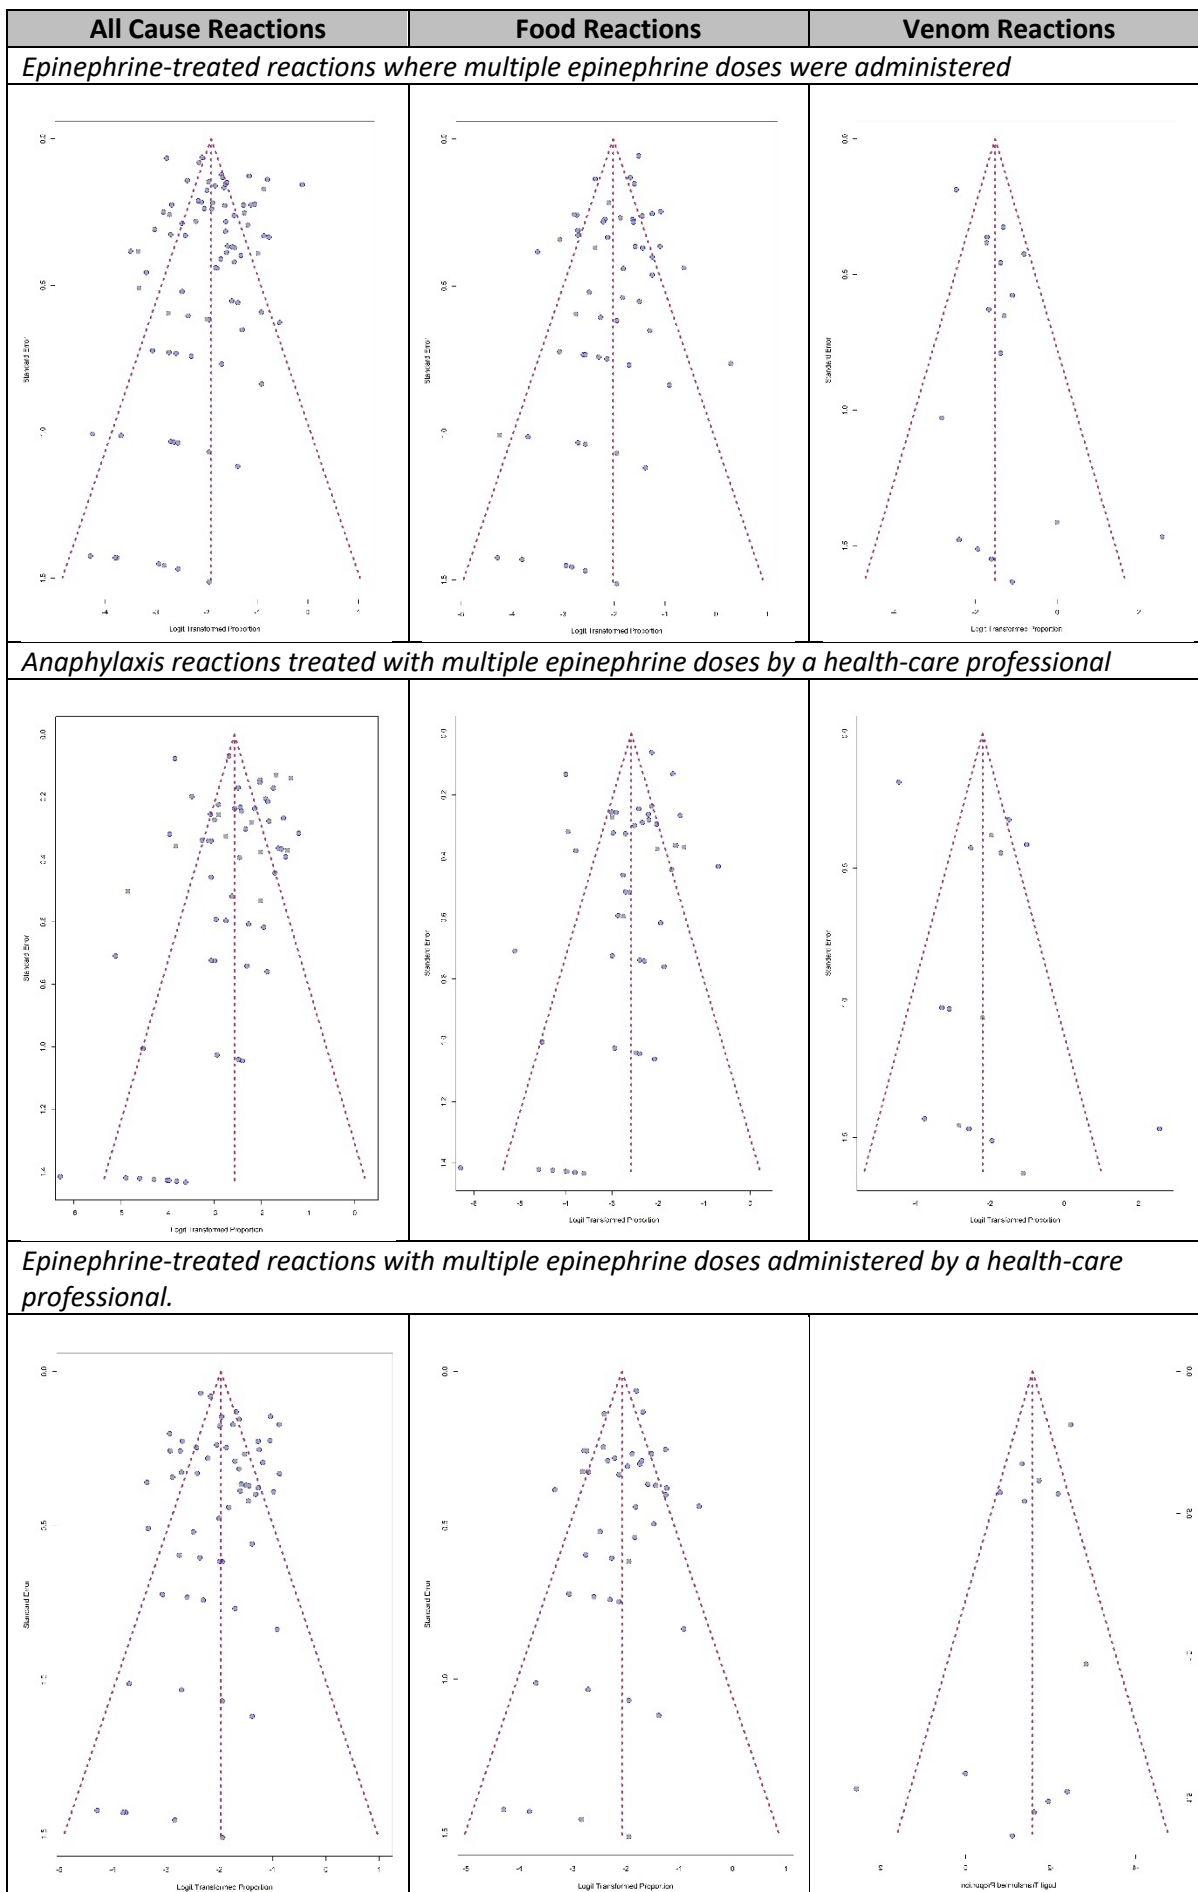

Above are funnel plots for each of the analyses listed in Table S7. Below are the results of the corresponding Egger Tests.

**Table S8: Egger Test: Intercept and p value**

Weighted linear regression of the treatment effect on its standard error, minimum study number = 10.

|                                                                                                                 | Intercept | p value       |
|-----------------------------------------------------------------------------------------------------------------|-----------|---------------|
| <i>Proportion of patients with allergic reactions who were diagnosed as having anaphylaxis</i>                  |           |               |
| ALL TRIGGERS                                                                                                    | 0.059     | 0.3956        |
| FOOD TRIGGERS                                                                                                   | -0.516    | 0.8697        |
| VENOM TRIGGERS                                                                                                  | -         | -             |
| <i>Proportion of anaphylaxis treated with multiple epinephrine doses</i>                                        |           |               |
| ALL TRIGGERS                                                                                                    | -2.594    | 0.4332        |
| FOOD TRIGGERS                                                                                                   | -1.948    | <b>0.0092</b> |
| VENOM TRIGGERS                                                                                                  | -3.634    | <b>0.0494</b> |
| <i>Cardiorespiratory reactions treated with multiple epinephrine doses</i>                                      |           |               |
| ALL TRIGGERS                                                                                                    | -2.054    | 0.7283        |
| FOOD TRIGGERS                                                                                                   | -2.575    | 0.8961        |
| VENOM TRIGGERS                                                                                                  | -4.121    | 0.0622        |
| <i>Epinephrine-treated reactions where multiple epinephrine doses were administered</i>                         |           |               |
| ALL TRIGGERS                                                                                                    | -1.977    | 0.5827        |
| FOOD TRIGGERS                                                                                                   | -1.588    | <b>0.0031</b> |
| VENOM TRIGGERS                                                                                                  | -2.275    | <b>0.0248</b> |
| <i>Anaphylaxis reactions treated with multiple epinephrine doses by a health-care professional</i>              |           |               |
| ALL TRIGGERS                                                                                                    | -2.631    | 0.6717        |
| FOOD TRIGGERS                                                                                                   | -2.227    | 0.1405        |
| VENOM TRIGGERS                                                                                                  | -3.795    | 0.0852        |
| <i>Epinephrine-treated reactions with multiple epinephrine doses administered by a health-care professional</i> |           |               |
| ALL TRIGGERS                                                                                                    | -1.973    | 0.9855        |
| FOOD TRIGGERS                                                                                                   | -1.822    | 0.0587        |
| VENOM TRIGGERS                                                                                                  | -2.321    | 0.0741        |

## G. Summary of Pooled Estimates for Sensitivity Analyses

The pooled estimates of each of the metaanalyses conducted for the listed sensitivity analyses are summarised below. Data are presented by trigger and anaphylaxis definition as % (95% CI).

### A. Prospective Studies only

Table S9. Pooled estimates for prospective studies only.

| %reactions treated with >1 dose epinephrine<br>% (95% CI)                                                | Trigger                 |                         |                         |
|----------------------------------------------------------------------------------------------------------|-------------------------|-------------------------|-------------------------|
|                                                                                                          | ALL                     | FOOD                    | VENOM                   |
|                                                                                                          | Any Setting<br>N=14,659 | Any Setting<br>N=7,596  | Any Setting<br>N=2,925  |
| A) Study-defined anaphylaxis                                                                             | 5.5%<br>(3.3 to 9.2%)   | 5.5%<br>(3.1 to 9.6%)   | 9.9%<br>(3.6 to 24.7%)  |
| B) "Cardiorespiratory" anaphylaxis                                                                       | 7.8%<br>(4.1 to 14.2%)  | 7.3%<br>(3.4 to 15.0%)  | 9.7%<br>(2.3 to 32.4%)  |
| C) Reaction treated with at least one dose of epinephrine                                                | 11.6%<br>(8.3 to 15.9%) | 12.9%<br>(9.5 to 17.4%) | 15.9%<br>(9.9 to 24.6%) |
| D) Reaction where further epinephrine administered by a healthcare professional                          | 5.1%<br>(2.9 to 9.0%)   | 5.1%<br>(2.9 to 9.0%)   | 9.3%<br>(3.3 to 23.3%)  |
| E) Epinephrine-treated reaction where with further epinephrine administered by a healthcare professional | 11.7%<br>(8.8 to 15.5%) | 11.9%<br>(9.3 to 15.2%) | 14.9%<br>(9.0 to 23.7%) |

### B. LOW Risk of Bias Studies only

Table S10. Pooled estimates for low risk of bias studies only.

| %reactions treated with >1 dose epinephrine<br>% (95% CI)                                                | Trigger                  |                         |                          |
|----------------------------------------------------------------------------------------------------------|--------------------------|-------------------------|--------------------------|
|                                                                                                          | ALL                      | FOOD                    | VENOM                    |
|                                                                                                          | Any Setting<br>N=22,294  | Any Setting<br>N=10,159 | Any Setting<br>N=3,040   |
| A) Study-defined anaphylaxis                                                                             | 7.4%<br>(5.9 to 9.3%)    | 6.6%<br>(4.8 to 9.0%)   | 9.6%<br>(5.2 to 17.2%)   |
| B) "Cardiorespiratory" anaphylaxis                                                                       | 10.3%<br>(7.7 to 13.6%)  | 9.5%<br>(5.7 to 15.3%)  | 6.9%<br>(2.3 to 19.0%)   |
| C) Reaction treated with at least one dose of epinephrine                                                | 12.9%<br>(10.6 to 15.7%) | 11.0%<br>(8.6 to 14.0%) | 17.5%<br>(12.2 to 24.5%) |
| D) Reaction where further epinephrine administered by a healthcare professional                          | 6.8%<br>(5.3 to 8.7%)    | 6.6%<br>(4.7 to 9.2%)   | 9.1%<br>(4.0 to 19.5%)   |
| E) Epinephrine-treated reaction where with further epinephrine administered by a healthcare professional | 11.8%<br>(9.7 to 14.4%)  | 11.2%<br>(8.8 to 14.1%) | 16.0%<br>(9.9 to 24.9%)  |



### C. Studies Published after 2006 only

Table S11. Pooled estimates for studies published after 2006 only.

| %reactions treated with >1 dose<br>epinephrine<br>% (95% CI)                                                   | Trigger                  |                         |                          |
|----------------------------------------------------------------------------------------------------------------|--------------------------|-------------------------|--------------------------|
|                                                                                                                | ALL                      | FOOD                    | VENOM                    |
|                                                                                                                | Any Setting<br>N=36,340  | Any Setting<br>N=12,512 | Any Setting<br>N=3194    |
| A) Study-defined anaphylaxis                                                                                   | 7.6%<br>(6.3 to 9.1%)    | 7.4%<br>(5.8 to 9.3%)   | 10.5%<br>(6.2 to 17.1%)  |
| B) "Cardiorespiratory" anaphylaxis                                                                             | 10.0%<br>(7.9 to 12.6%)  | 10.2%<br>(7.3 to 14.1%) | 11.1%<br>(4.3 to 26.0%)  |
| C) Reaction treated with at least one dose<br>of epinephrine                                                   | 12.7%<br>(11.0 to 14.8%) | 11.7%<br>(9.9 to 13.9%) | 18.0%<br>(13.2 to 24.0%) |
| D) Reaction where further epinephrine<br>administered by a healthcare professional                             | 7.2%<br>(5.9 to 8.9%)    | 7.2%<br>(5.6 to 9.1%)   | 10.0%<br>(5.1 to 18.8%)  |
| E) Epinephrine-treated reaction where<br>with further epinephrine administered by a<br>healthcare professional | 12.3%<br>(10.4 to 14.4%) | 11.2%<br>(9.4 to 13.3%) | 17.1%<br>(11.3 to 25.0%) |

### D. Studies published as Full-Texts in peer-reviewed journals only

Table S12. Pooled estimates for Full-Text references only.

| %reactions treated with >1 dose<br>epinephrine<br>% (95% CI)                                                   | Trigger                  |                         |                          |
|----------------------------------------------------------------------------------------------------------------|--------------------------|-------------------------|--------------------------|
|                                                                                                                | ALL                      | FOOD                    | VENOM                    |
|                                                                                                                | Any Setting<br>N=34,790  | Any Setting<br>N=11,851 | Any Setting<br>N=3147    |
| A) Study-defined anaphylaxis                                                                                   | 7.3%<br>(6.1 to 8.9%)    | 6.8%<br>(5.2 to 8.8%)   | 10.6%<br>(6.2 to 17.5%)  |
| B) "Cardiorespiratory" anaphylaxis                                                                             | 9.9%<br>(7.8 to 12.6%)   | 9.8%<br>(6.7 to 14.0%)  | 11.1%<br>(4.0 to 27.5%)  |
| C) Reaction treated with at least one dose<br>of epinephrine                                                   | 12.7%<br>(10.9 to 14.7%) | 11.5%<br>(9.5 to 13.9%) | 17.2%<br>(12.3 to 23.4%) |
| D) Reaction where further epinephrine<br>administered by a healthcare professional                             | 6.9%<br>(5.5 to 8.7%)    | 6.7%<br>(5.2 to 8.9%)   | 10.7%<br>(5.1 to 21.0%)  |
| E) Epinephrine-treated reaction where<br>with further epinephrine administered by a<br>healthcare professional | 12.2%<br>(10.2 to 14.5%) | 11.1%<br>(9.2 to 13.4%) | 16.5%<br>(10.8 to 24.5%) |

## H. Record Flow: Excluded Records at Full-Text screening

The references reviewed at during the full-text screening, along with outcome and reason are listed below.

**Table S13: References excluded at full-text screening with reason for exclusion provided**

| AUTHOR                                                                                                                                                                                                                                   | TITLE                                                                                                             | YR   | JOURNAL                                                      | SCREENING OUTCOME            | REASON for OUTCOME               |
|------------------------------------------------------------------------------------------------------------------------------------------------------------------------------------------------------------------------------------------|-------------------------------------------------------------------------------------------------------------------|------|--------------------------------------------------------------|------------------------------|----------------------------------|
| Alvarez-Perea, A. A., B.; Morales, C.; Zambrano, G.; Rodriguez, A.; Guzman, M.; Zubeldia, J. M.; Baeza, M. L.                                                                                                                            | Anaphylaxis in the Pediatric Emergency Department: Analysis of 133 Cases After an Allergy Workup                  | 2017 | Journal of Allergy and Clinical Immunology: In Practice      | Excluded at Full-Text Screen | No 2nd dose data                 |
| Yanagida, N. S., S.; Asaumi, T.; Ogura, K.; Borres, M. P.; Ebisawa, M.                                                                                                                                                                   | Safety and feasibility of heated egg yolk challenge for children with egg allergies                               | 2017 | Pediatric Allergy and Immunology                             | Excluded at Full-Text Screen | No 2nd dose data                 |
| Gawlik, R. M., M.; Kolodziej, I.; Dzienniak, A.; Bozek, A.                                                                                                                                                                               | First-line treatment of hymenoptera venom anaphylaxis: a 23-year real-life experience                             | 2017 | Annals of Allergy, Asthma and Immunology                     | Excluded at Full-Text Screen | No 2nd dose data                 |
| Jeong, K. L., S. Y.; Ahn, K.; Kim, J.; Lee, H. R.; Suh, D. I.; Pyun, B. Y.; Min, T. K.; Kwon, J. W.; Kim, K. E.; Kim, K. W.; Sohn, M. H.; Kim, Y. H.; Song, T. W.; Kwon, J. H.; Jeon, Y. H.; Kim, H. Y.; Kim, J. H.; Ahn, Y. M.; Lee, S. | A multicenter study on anaphylaxis caused by peanut, tree nuts, and seeds in children and adolescents             | 2017 | Allergy: European Journal of Allergy and Clinical Immunology | Excluded at Full-Text Screen | No 2nd dose data                 |
| Lee, A. Y. M. E., P.; Clarke, A. E.; La Vieille, S.; Eisman, H.; Chan, E. S.; Mill, C.; Joseph, L.; Ben-Shoshan, M.                                                                                                                      | Anaphylaxis across two canadian pediatric centers: Evaluating management disparities                              | 2017 | Journal of Asthma and Allergy                                | Excluded at Full-Text Screen | No 2nd dose data                 |
| Lee, S. H., E. P.; Lohse, C.; Gilani, W.; Chamberlain, A. M.; Campbell, R. L.                                                                                                                                                            | Trends, characteristics, and incidence of anaphylaxis in 2001-2010: A population-based study                      | 2017 | Journal of Allergy and Clinical Immunology                   | Excluded at Full-Text Screen | No 2nd dose data                 |
| Lee, S. P., A.; Lohse, C. M.; Hess, E. P.; Campbell, R. L.                                                                                                                                                                               | Derivation of a clinical decision rule to predict biphasic reactions in emergency department anaphylaxis patients | 2017 | Academic Emergency Medicine                                  | Excluded at Full-Text Screen | No 2nd dose data                 |
| Vetander, M. P., J. L. P.; Lilja, G.; Kull, I.; Hedlin, G.; van Hage, M.; Ostblom, E.; Bergstrom, A.; Wickman, M.                                                                                                                        | Anaphylaxis to foods in a population of adolescents: incidence, characteristics and associated risks              | 2016 | Clinical and Experimental Allergy                            | Excluded at Full-Text Screen | No 2nd dose data                 |
| Vasar, M. L., A.; Julge, K.; Kivivare, M.; Voor, T.                                                                                                                                                                                      | Anaphylaxis cases in children's clinic of tartu university hospital during the years 2005-2014                    | 2016 | Eesti Arst                                                   | Excluded at Full-Text Screen | No 2nd dose data                 |
| Grzyb, M. J. C., A.; Kimchi, N.; Lachaine, C.; La Vieille, S.; Joseph, L.; Mill, C.; Ben-Shoshan, M.                                                                                                                                     | Anaphylaxis cases treated by out-of-hospital EMS in Western Quebec                                                | 2016 | Journal of Allergy and Clinical Immunology                   | Excluded at Full-Text Screen | No 2nd dose data                 |
| Blaziene, A. B., N.; Paltarackiene, V.; DuBuske, L. M.                                                                                                                                                                                   | Analysis of anaphylaxis trigger factors and treatment during a five year period in a vilnius university hospital  | 2016 | Journal of Allergy and Clinical Immunology                   | Excluded at Full-Text Screen | No 2nd dose data                 |
| Worm, M. D., S.; Francuzik, W.                                                                                                                                                                                                           | Data from the anaphylaxis registry of the German-speaking countries                                               | 2015 | Revue Francaise d'Allergologie                               | Excluded at Full-Text Screen | Multiple publications of dataset |

|                                                                                               |                                                                                                                               |      |                                                              |                              |                  |
|-----------------------------------------------------------------------------------------------|-------------------------------------------------------------------------------------------------------------------------------|------|--------------------------------------------------------------|------------------------------|------------------|
| Katz, Y. N.-W., A.; Spergel, J. M.                                                            | Prevalence of biphasic response in anaphylaxis due to purposeful administration of allergenic food                            | 2015 | Annals of Allergy, Asthma and Immunology                     | Excluded at Full-Text Screen | No 2nd dose data |
| Dhami, S. R., L.; Austin, M.; Sheikh, A.                                                      | Anaphylaxis in the community: a questionnaire survey of members of the UK Anaphylaxis Campaign                                | 2015 | JRSM Open                                                    | Excluded at Full-Text Screen | No 2nd dose data |
| Robb, A. L. T., T. W.                                                                         | Pre-hospital and emergency room management of pediatric anaphylaxis                                                           | 2015 | Canadian Journal of Emergency Medicine                       | Excluded at Full-Text Screen | No 2nd dose data |
| Fitzgerald, A. S., S.; Koonamave, R.                                                          | Audit of failed inpatient oral food challenges in the pediatric population                                                    | 2015 | Internal Medicine Journal                                    | Excluded at Full-Text Screen | No 2nd dose data |
| Patel, M. Z., C.; O'Hehir, R.; Hew, M.                                                        | Emergency management of anaphylaxis at a tertiary centre                                                                      | 2015 | Internal Medicine Journal                                    | Excluded at Full-Text Screen | No 2nd dose data |
| Dang, A. T. C., P.; Perez Ramirez, L.; Morris, D.; Goodman, M.; Assa'ad, A. H.                | Epinephrine ordering and utilization for inoffice oral food challenges: Standardization of practice                           | 2015 | Annals of Allergy, Asthma and Immunology                     | Excluded at Full-Text Screen | No 2nd dose data |
| Sandilos, C. P., M.; Gkavogiannakis, N.; Skarlatou, G.; Aggelides, X.; Chliva, C.; Makris, M. | Anaphylaxis in the emergency department: Data of a Greek tertiary hospital                                                    | 2015 | Allergy: European Journal of Allergy and Clinical Immunology | Excluded at Full-Text Screen | No 2nd dose data |
| McLaughlin, C. C., J.; Aralihond, A.                                                          | An audit of the management of anaphylaxis in children in a district general hospital                                          | 2015 | Archives of Disease in Childhood                             | Excluded at Full-Text Screen | No 2nd dose data |
| Mitthamsiri, W. H., S.; Ruxrungtham, K.                                                       | Food-induced anaphylaxis in thailand: A 10 years data from a tertiary care center in bangkok                                  | 2015 | Journal of Allergy and Clinical Immunology                   | Excluded at Full-Text Screen | No 2nd dose data |
| Aranez, V. T. L., M. G.; Relan, M.; Qiao, H.; Wrotniak, B.; Lehman, H. K.                     | An evaluation of the treatment of anaphylaxis in a pediatric emergency room setting                                           | 2015 | Journal of Allergy and Clinical Immunology                   | Excluded at Full-Text Screen | No 2nd dose data |
| Hemler, J. A. S., H. P.                                                                       | Management of children with anaphylaxis in an urban emergency department                                                      | 2015 | Journal of Allergy and Clinical Immunology                   | Excluded at Full-Text Screen | No 2nd dose data |
| O'Connor, M. J. E., M. K.                                                                     | Anaphylaxis in a rural emergency department: The dartmouth-hitchcock experience                                               | 2015 | Journal of Allergy and Clinical Immunology                   | Excluded at Full-Text Screen | No 2nd dose data |
| Torabi, B. M., J.; Clarke, A.; La Vieille, S.; Alizadehfar, R.; Joseph, L.; Ben-Shoshan, M.   | Anaphylaxis cases presenting to the emergency center over a two year period in Montreal, Canada                               | 2015 | Journal of Allergy and Clinical Immunology                   | Excluded at Full-Text Screen | No 2nd dose data |
| Alangari, A. A.                                                                               | Characteristics of patients presenting to the emergency department with anaphylaxis in Riyadh, Saudi Arabia                   | 2014 | Journal of Taibah University Medical Sciences                | Excluded at Full-Text Screen | No 2nd dose data |
| Lee, S. B., M. F.; Hess, E. P.; Campbell, R. L.                                               | Predictors of Biphasic Reactions in the Emergency Department for Patients With Anaphylaxis                                    | 2014 | Journal of Allergy and Clinical Immunology: In Practice      | Excluded at Full-Text Screen | No 2nd dose data |
| Clark, S. W., W.; Rudders, S. A.; Camargo, C. A.                                              | Risk factors for severe anaphylaxis in patients receiving anaphylaxis treatment in US emergency departments and hospitals     | 2014 | Journal of Allergy and Clinical Immunology                   | Excluded at Full-Text Screen | No 2nd dose data |
| Charatsi, A. M. M., S.; Aversano, G.; Casimir, G.                                             | P32-Food anaphylaxis experience in children in Brussels                                                                       | 2014 | Clinical and Translational Allergy                           | Excluded at Full-Text Screen | No 2nd dose data |
| Gupta, R. D.-C., L.; Rivkina, V.                                                              | Emergency epinephrine use for food allergy reactions in Chicago Public Schools                                                | 2014 | Annals of Allergy, Asthma and Immunology                     | Excluded at Full-Text Screen | No 2nd dose data |
| Shima, D. I., Y.; Yamamoto, Y.; Nagayasu, S.; Fujimoto, Y.                                    | A database study to investigate the incidence of anaphylaxis and the prescription rate of self-injection epinephrine in Japan | 2014 | Value in Health                                              | Excluded at Full-Text Screen | No 2nd dose data |

|                                                                                                                 |                                                                                                                 |      |                                                              |                              |                  |
|-----------------------------------------------------------------------------------------------------------------|-----------------------------------------------------------------------------------------------------------------|------|--------------------------------------------------------------|------------------------------|------------------|
| Larionova, A. V., T.; Vasar, M.; Julge, K.; Kivivare, M.                                                        | Pediatric anaphylaxis cases between 2009-2013 in Estonia: A single-centre experience                            | 2014 | Allergy: European Journal of Allergy and Clinical Immunology | Excluded at Full-Text Screen | No 2nd dose data |
| Ameiro, B. N., B.; Zambrano, G.; Morales, C.; Guzman, M.; Baeza, M. L.; Alvarez-Perea, A.                       | Characteristics of anaphylaxis in a pediatric emergency unit                                                    | 2014 | Journal of Allergy and Clinical Immunology                   | Excluded at Full-Text Screen | No 2nd dose data |
| Kimchi, N. C., A. E.; Moisan, J.; Lachaine, C.; Vieille, S. L.; Asai, Y.; Joseph, L.; Mill, C.; Ben-Shoshan, M. | Anaphylaxis cases presenting to primary care paramedics in Quebec                                               | 2014 | Journal of Allergy and Clinical Immunology                   | Excluded at Full-Text Screen | No 2nd dose data |
| Topal, E. B., A.; Yilmaz, O.; Karagol, I. H. E.; Arga, M.; Demirsoy, M. S.; Turktas, I.                         | Epidemiological and clinical features of anaphylaxis: Single center experience with 109 children                | 2013 | Pediatric, Allergy, Immunology, and Pulmonology              | Excluded at Full-Text Screen | No 2nd dose data |
| Liew, W. K. C., W. C.; Goh, A. E.; Lim, H. H.; Chay, O. M.; Chang, S.; Tan, J. H.; Shih, E.; Kidon, M.          | Paediatric anaphylaxis in a Singaporean children cohort: Changing food allergy triggers over time               | 2013 | Asia Pacific Allergy                                         | Excluded at Full-Text Screen | No 2nd dose data |
| Sala-Cunill, A. C., V.; Labrador-Horrillo, M.; Luengo, O.; Esteso, O.; Garriga, T.; Vicario, M.; Guilarte, M.   | Usefulness and limitations of sequential serum tryptase for the diagnosis of anaphylaxis in 102 patients        | 2013 | International Archives of Allergy and Immunology             | Excluded at Full-Text Screen | No 2nd dose data |
| Yavuz, S. T. S., U. M.; Buyuktiryaki, B.; Soyer, O. U.; Sackesen, C.; Sekerel, B. E.; Tuncer, A.                | Clinical features of children with venom allergy and risk factors for severe systemic reactions                 | 2013 | International Archives of Allergy and Immunology             | Excluded at Full-Text Screen | No 2nd dose data |
| Gushken, A. F. W., L. A.; Beck, C. L.; Castro, A. P. B. M.; Yonamine, G. H.; Pastorino, A. C.; Jacob, C. M. A.  | Anaphylactic reactions during oral food challenge test in pediatric patients                                    | 2013 | Clinical and Translational Allergy                           | Excluded at Full-Text Screen | No 2nd dose data |
| Moneret-Vautrin, A.                                                                                             | Emergency treatment of food anaphylaxis: A report of 152 cases registered by the Allergy Vigilance Network      | 2013 | Clinical and Translational Allergy                           | Excluded at Full-Text Screen | No 2nd dose data |
| Haltinner, K. K., A.                                                                                            | Anaphylaxis in children-data from Zurich                                                                        | 2013 | Swiss Medical Weekly                                         | Excluded at Full-Text Screen | No 2nd dose data |
| Mitchell, R. C. D., N. M.; Akindolie, O.; Braithwaite, N.                                                       | The management and follow-up of patients presenting with anaphylaxis to the paediatric emergency department     | 2013 | Clinical and Experimental Allergy                            | Excluded at Full-Text Screen | No 2nd dose data |
| Krishnamoorthy, S. K., S. G.; Rao, R.                                                                           | Anaphylaxis in children: 2 years audit of practice in a tertiary children's hospital in Asia-Pacific Region     | 2013 | Clinical and Experimental Allergy                            | Excluded at Full-Text Screen | No 2nd dose data |
| Zolkipli, Z. E.-L., M.; Grainger-Allen, E.; Roberts, G.                                                         | How many adrenaline autoinjectors should be prescribed to patients at risk of anaphylaxis - A systematic review | 2013 | Clinical and Experimental Allergy                            | Excluded at Full-Text Screen | No 2nd dose data |
| Farah, N. W., A.; Joyce, M.; Rajakulasingam, K.                                                                 | An audit analysis of anaphylaxis presenting at Homerton University Hospital (HUH)                               | 2013 | Clinical and Experimental Allergy                            | Excluded at Full-Text Screen | No 2nd dose data |
| Orhan, F. K. T., I.; Cakir, M.; Cihan, M.; Baki, A.; Dereci, S.                                                 | Anaphylaxis in children: A single-centre, 10-years retrospective, case study                                    | 2013 | Allergy: European Journal of Allergy and Clinical Immunology | Excluded at Full-Text Screen | No 2nd dose data |
| Ponce Guevara, V. M. R., E.; Gonzalez Ruiz, A.; Munoz-Bellido, F.; Laffond Yges, E.; Davila Gonzalez, I.        | Use of epinephrine in a tertiary hospital                                                                       | 2013 | Allergy: European Journal of Allergy and Clinical Immunology | Excluded at Full-Text Screen | No 2nd dose data |

|                                                                                                                                               |                                                                                                                                                                       |      |                                                              |                              |                  |
|-----------------------------------------------------------------------------------------------------------------------------------------------|-----------------------------------------------------------------------------------------------------------------------------------------------------------------------|------|--------------------------------------------------------------|------------------------------|------------------|
| Jiang, N. N. Y., J.; Wen, P. L.                                                                                                               | Anaphylaxis in children and adults referred to a tertiary allergy clinic: A retrospective study of 1292 anaphylactic reactions                                        | 2013 | Annals of Allergy, Asthma and Immunology                     | Excluded at Full-Text Screen | No 2nd dose data |
| Trepp, S. H., A.; Muller, U.                                                                                                                  | Emergency treatment of patients with hymenoptera venom allergy. Is the treatment in accordance with the guidelines?                                                   | 2013 | Respiration                                                  | Excluded at Full-Text Screen | No 2nd dose data |
| Ward, C. E. M., L.; Greenhawt, M. J.                                                                                                          | Treatment of allergic reactions and quality of life among caregivers of food allergic children                                                                        | 2013 | Journal of Allergy and Clinical Immunology                   | Excluded at Full-Text Screen | No 2nd dose data |
| Ben-Shoshan, M. V., S. L.; Eisman, H.; Alizadehfar, R.; Perkins, E.; Joseph, L.; Morris, J.; Clarke, A. E.                                    | Anaphylaxis in children treated at the Montreal children's hospital: Rate, clinical characteristics, triggers and management                                          | 2013 | Journal of Allergy and Clinical Immunology                   | Excluded at Full-Text Screen | No 2nd dose data |
| Fleming, J. C., S.; Camargo Jr, C.; Rudders, S. A.                                                                                            | Early treatment of food-induced allergic reactions with epinephrine is associated with lower risk of hospital admission                                               | 2013 | Journal of Allergy and Clinical Immunology                   | Excluded at Full-Text Screen | No 2nd dose data |
| Rafeeq, M. R. D., M.                                                                                                                          | Food allergy and anaphylaxis-2037. Emergency department management of insect-sting allergic reactions in a community hospital in the United States                    | 2013 | World Allergy Organization Journal                           | Excluded at Full-Text Screen | No 2nd dose data |
| Vetander, M. H., D.; Flodstrom, C.; Ostblom, E.; Alfven, T.; Ly, D. H.; Hedlin, G.; Lilja, G.; Nilsson, C.; Wickman, M.                       | Anaphylaxis and reactions to foods in children - a population-based case study of emergency department visits                                                         | 2012 | Clinical and Experimental Allergy                            | Excluded at Full-Text Screen | No 2nd dose data |
| Santos, N. G., A.; Piedade, S.; Santa-Marta, C.; Pires, G.; Sampaio, G.; Borrego, L.; Arede, C.; Morais-Almeida, M.                           | Anaphylaxis in children and adolescents: A 1-year survey in an immunoallergy department                                                                               | 2012 | Allergy: European Journal of Allergy and Clinical Immunology | Excluded at Full-Text Screen | No 2nd dose data |
| Clark, S. R., S.; Wei, W.; Camargo, C.                                                                                                        | A retrospective database study of us patients treated in the emergency department (ED) or hospital with anaphylaxis: Factors associated with severe anaphylaxis       | 2012 | Annals of Allergy, Asthma and Immunology                     | Excluded at Full-Text Screen | No 2nd dose data |
| Chouksey, A. S., D.; Puri, P.; Swamy, K.                                                                                                      | Management of anaphylaxis: Are we compliant with the national guidelines                                                                                              | 2012 | Annals of Allergy, Asthma and Immunology                     | Excluded at Full-Text Screen | No 2nd dose data |
| Landsman-Blumberg, P. B. W., W.; Douglas, D.; Smith, D.; Camargo, C. A.                                                                       | A retrospective database study of us children in the emergency department or hospital with food-induced anaphylaxis: Concordance with recommended post-discharge care | 2012 | Journal of Allergy and Clinical Immunology                   | Excluded at Full-Text Screen | No 2nd dose data |
| Boyle, J. C., C. A.; Lieberman, P.; Sampson, H.; Schwartz, L. B.; R. Simons F.E; Zitt, M.; Wilkinson, M.; Collins, C.; Tringale, M.; Wood, R. | Anaphylaxis in america-results from a national telephone survey                                                                                                       | 2012 | Journal of Allergy and Clinical Immunology                   | Excluded at Full-Text Screen | No 2nd dose data |
| Raie, A. M., S.; Heffler, E.; Cadario, G.; Galimberti, M.; Rolla, G.                                                                          | Food anaphylaxis: Data from registry of Center for Severe Allergic Reactions of Piemonte region (Italy)                                                               | 2011 | Clinical and Translational Allergy                           | Excluded at Full-Text Screen | No 2nd dose data |
| Raie, A. M., S.; Nebiolo, F.; Cadario, G.; Galimberti, M.; Heffler, E.; Rolla, G.                                                             | Epidemiology of anaphylaxis in Piemonte, Italy: Data from the regional registry of severe allergic reactions                                                          | 2011 | Allergy: European Journal of Allergy and Clinical Immunology | Excluded at Full-Text Screen | No 2nd dose data |
| Masumoto, N. S., R.; Yohei, A.; Yuko, A.; Yoshitaka, M.; Naohiko, T.; Yoko, M.; Motomura, C.; Honjo, S.; Kenji, O.; Hiroshi, O.               | Immediate food-allergic children visited to our hospital emergency room                                                                                               | 2011 | Allergy: European Journal of Allergy and Clinical Immunology | Excluded at Full-Text Screen | No 2nd dose data |

|                                                                                                                                                 |                                                                                                                                                      |      |                                                              |                              |                           |
|-------------------------------------------------------------------------------------------------------------------------------------------------|------------------------------------------------------------------------------------------------------------------------------------------------------|------|--------------------------------------------------------------|------------------------------|---------------------------|
| Cortes Alvarez, N. R. F., L.; Piza Oliveras, A.; May Llanas, E.; Margarit Mallol, J.                                                            | Management of anaphylaxis in a pediatric emergency department                                                                                        | 2011 | Allergy: European Journal of Allergy and Clinical Immunology | Excluded at Full-Text Screen | No 2nd dose data          |
| Takeishi, D. K., T.; Utsunomiya, T.; Sato, S.; Imai, T.; Tomikawa, M.; Syukuya, A.; Ebisawa, M.                                                 | Oral challenge tests for sesame in Japan, A summary of 91 cases                                                                                      | 2011 | Allergy: European Journal of Allergy and Clinical Immunology | Excluded at Full-Text Screen | No 2nd dose data          |
| Mietta, S. R., A.; Nebiolo, F.; Cadario, G.; Galimberti, M.; Rolla, G.                                                                          | Food anaphylaxis in Piemonte Region (ITALY): Data from the regional registry of severe allergic reactions                                            | 2011 | Allergy: European Journal of Allergy and Clinical Immunology | Excluded at Full-Text Screen | No 2nd dose data          |
| Ly, D.                                                                                                                                          | Readmittance of children to hospital emergency departments due to repeated reactions to food in Stockholm county-change in severity at re-exposure   | 2011 | Allergy: European Journal of Allergy and Clinical Immunology | Excluded at Full-Text Screen | No 2nd dose data          |
| Orhan, F. B. B., A.; Yilmaz, O.; Reisli, I.; Cakir, M.; Karakas, T.; Yuksel, H.                                                                 | Anaphylaxis in pediatric patients: A multi-center, retrospective, case study                                                                         | 2009 | Allergy: European Journal of Allergy and Clinical Immunology | Excluded at Full-Text Screen | No 2nd dose data          |
| Le, T. V. H., E.; Pasmans, S.; Bruijnzeel-Koomen, C.; Knulst, A.                                                                                | Suboptimal management of acute foodallergic reactions by patients, emergency departments and general practitioners                                   | 2009 | Allergy: European Journal of Allergy and Clinical Immunology | Excluded at Full-Text Screen | No 2nd dose data          |
| Rudders, S. A. B., A.; Vassallo, M. F.; Clark, S.; Camargo, C. A.                                                                               | Trends in pediatric emergency department visits for food-induced anaphylaxis                                                                         | 2010 | Journal of Allergy and Clinical Immunology                   | Excluded at Full-Text Screen | No 2nd dose data          |
| Ben-Shoshan, M. N., L. N.; Alizadehfar, R.; Soller, L.; Fragapane, J.; Joseph, L.; St Pierre, Y.; Harada, L.; Fortin, C.; Allen, M.; Clarke, A. | Treatment of allergic reactions to peanut in recent versus initial reaction                                                                          | 2010 | Allergy, Asthma and Clinical Immunology                      | Excluded at Full-Text Screen | No 2nd dose data          |
| Helbling, A. M., U.; Hausmann, O.                                                                                                               | Anaphylaxis - Reality of acute therapy and preventive measures. Analysis of 54 patients in a specialized city hospital                               | 2009 | Allergologie                                                 | Excluded at Full-Text Screen | No 2nd dose data          |
| De Silva, I. L. M., S. S.; Tey, D.; Tang, M. L. K.                                                                                              | Paediatric anaphylaxis: A 5 year retrospective review                                                                                                | 2008 | Allergy: European Journal of Allergy and Clinical Immunology | Excluded at Full-Text Screen | No 2nd dose data          |
| Peng, M. M. J., H.                                                                                                                              | A Population-Based Study of the Incidence, Cause, and Severity of Anaphylaxis in the United Kingdom                                                  | 2004 | Archives of Internal Medicine                                | Excluded at Full-Text Screen | No 2nd dose data          |
| Dobbie, A. R., C. M.                                                                                                                            | Provision of self-injectable adrenaline for children at risk of anaphylaxis: Its source, frequency and appropriateness of use, and effect            | 1998 | Ambulatory Child Health                                      | Excluded at Full-Text Screen | Exclude for other reasons |
| Bresser, H. S., C.; Rakoski, J.                                                                                                                 | Emergencies by insect stings in Munich in 1992                                                                                                       | 1995 | Allergo Journal                                              | Excluded at Full-Text Screen | No 2nd dose data          |
| Ganapathy, S. L., Zaw; Ting, Daniel Ha; Goh, Lynette Sh; Chong, Shu Ling                                                                        | Anaphylaxis in Children: Experience of 485 Episodes in 1,272,482 Patient Attendances at a Tertiary Paediatric Emergency Department from 2007 to 2014 | 2016 | Annals of the Academy of Medicine, Singapore                 | Excluded at Full-Text Screen | No 2nd dose data          |
| Manuyakorn, W. B., Suwat; Kamchaisatian, Wasu; Vilaiyuk, Soamarat; Sasisakulporn, Cherapat; Jotikasthira, Wanlapa                               | Pediatric anaphylaxis: triggers, clinical features, and treatment in a tertiary-care hospital                                                        | 2015 | Asian Pacific journal of allergy and immunology              | Excluded at Full-Text Screen | No 2nd dose data          |
| Gaspar, A. S., N.; Piedade, S.; Santa-Marta, C.; Pires, G.; Sampaio, G.; Arede, C.; Borrego, L. M.; Morais-Almeida, M.                          | One-year survey of paediatric anaphylaxis in an allergy department                                                                                   | 2015 | European annals of allergy and clinical immunology           | Excluded at Full-Text Screen | No 2nd dose data          |

|                                                                                                                                                                                                        |                                                                                                                                                    |      |                                                                                                                        |                              |                  |
|--------------------------------------------------------------------------------------------------------------------------------------------------------------------------------------------------------|----------------------------------------------------------------------------------------------------------------------------------------------------|------|------------------------------------------------------------------------------------------------------------------------|------------------------------|------------------|
| Alvarez-Perea, A. T.-P., M.; Martinez-Lezcano, P.; Marco, G.; Perez, D.; Zubeldia, J. M.; Baeza, M. L.                                                                                                 | Anaphylaxis in Adolescent/Adult Patients Treated in the Emergency Department: Differences Between Initial Impressions and the Definitive Diagnosis | 2015 | Journal of investigational allergology & clinical immunology                                                           | Excluded at Full-Text Screen | No 2nd dose data |
| Asai, Y. Y., Yarden; Clarke, Ann; La Vieille, Sebastian; Delaney, J. Scott; Alizadehfar, Reza; Joseph, Lawrence; Mill, Christopher; Morris, Judy; Ben-Shoshan, Moshe                                   | Rate, triggers, severity and management of anaphylaxis in adults treated in a Canadian emergency department                                        | 2014 | International archives of allergy and immunology                                                                       | Excluded at Full-Text Screen | No 2nd dose data |
| Chan, C.-F. C., Po-Hon; Huang, Ching-Feng; Wu, Tzee-Chung                                                                                                                                              | Emergency department visits for food allergy in Taiwan: a retrospective study                                                                      | 2014 | Pediatrics and neonatology                                                                                             | Excluded at Full-Text Screen | No 2nd dose data |
| Wood, R. A. C., Carlos A., Jr.; Lieberman, Philip; Sampson, Hugh A.; Schwartz, Lawrence B.; Zitt, Myron; Collins, Charlotte; Tringale, Michael; Wilkinson, Marilyn; Boyle, John; Simons, F. Estelle R. | Anaphylaxis in America: the prevalence and characteristics of anaphylaxis in the United States                                                     | 2014 | The Journal of allergy and clinical immunology                                                                         | Excluded at Full-Text Screen | No 2nd dose data |
| Vetander, M. L., D. H.; Hakansson, N.; Lilja, G.; Nilsson, C.; Ostblom, E.; Wickman, M.; Bergstrom, A.                                                                                                 | Recurrent reactions to food among children at paediatric emergency departments: epidemiology of allergic disease                                   | 2014 | Clinical and experimental allergy : journal of the British Society for Allergy and Clinical Immunology                 | Excluded at Full-Text Screen | No 2nd dose data |
| Landsman-Blumberg, P. B. W., Wenhui; Douglas, Damon; Smith, David M.; Clark, Sunday; Camargo, Carlos A., Jr.                                                                                           | Food-induced anaphylaxis among commercially insured US adults: patient concordance with postdischarge care guidelines                              | 2013 | The journal of allergy and clinical immunology. In practice                                                            | Excluded at Full-Text Screen | No 2nd dose data |
| Calderon, E. M., Javier; Nazario, Sylvette                                                                                                                                                             | Anaphylaxis diagnosis and treatment at an emergency department in Puerto Rico                                                                      | 2013 | Puerto Rico health sciences journal                                                                                    | Excluded at Full-Text Screen | No 2nd dose data |
| Khan, N. U. S., N.; Makda, A.; Mallick, A. S.; Ali Memon, M.; Hashmi, S. H.; Khan, U. R.; Razzak, J. A.                                                                                                | Anaphylaxis: incidence, presentation, causes and outcome in patients in a tertiary-care hospital in Karachi, Pakistan                              | 2013 | QJM : monthly journal of the Association of Physicians                                                                 | Excluded at Full-Text Screen | No 2nd dose data |
| Rudders, S. A. C., Sunday; Wei, Wenhui; Camargo, Carlos A., Jr.                                                                                                                                        | Longitudinal study of 954 patients with stinging insect anaphylaxis                                                                                | 2013 | Annals of allergy, asthma & immunology : official publication of the American College of Allergy, Asthma, & Immunology | Excluded at Full-Text Screen | No 2nd dose data |
| Vezir, E. E., Mustafa; Kaya, Aysenur; Toyran, Muge; Ozcan, Celal; Akan, Aysegul; Azkur, Dilek; Ginis, Tayfur; Civelek, Ersoy; Kocabas, Can Naci                                                        | Characteristics of anaphylaxis in children referred to a tertiary care center                                                                      | 2013 | Allergy and asthma proceedings                                                                                         | Excluded at Full-Text Screen | No 2nd dose data |
| Nagano, C. I., Akira; Yotani, Nobuyuki; Sakai, Hirokazu; Fujiwara, Takeo; Ohya, Yukihiko                                                                                                               | (Anaphylaxis and biphasic reaction in a children hospital)                                                                                         | 2013 | Arerugi = (Allergy)                                                                                                    | Excluded at Full-Text Screen | No 2nd dose data |
| Gelincik, A. D., Mustafa; Yilmaz, Emre; Ertek, Belkis; Erdogdu, Derya; Colakoglu, Bahattin; Buyukozturk, Suna                                                                                          | Anaphylaxis in a tertiary adult allergy clinic: a retrospective review of 516 patients                                                             | 2013 | Annals of allergy, asthma & immunology : official publication of the American College of Allergy, Asthma, & Immunology | Excluded at Full-Text Screen | No 2nd dose data |
| Jacobs, T. S. G., Matthew J.; Hauswirth, David; Mitchell, Lynda; Green, Todd D.                                                                                                                        | A survey study of index food-related allergic reactions and anaphylaxis management                                                                 | 2012 | Pediatric allergy and immunology : official publication of the European Society of Pediatric Allergy and Immunology    | Excluded at Full-Text Screen | No 2nd dose data |

|                                                                                                                                                                              |                                                                                                                 |      |                                                                                                                        |                              |                           |
|------------------------------------------------------------------------------------------------------------------------------------------------------------------------------|-----------------------------------------------------------------------------------------------------------------|------|------------------------------------------------------------------------------------------------------------------------|------------------------------|---------------------------|
| Nguyen-Luu, N. U. B.-S.; Moshe; Alizadehfar, Reza; Joseph, Lawrence; Harada, Laurie; Allen, Mary; St-Pierre, Yvan; Clarke, Ann                                               | Inadvertent exposures in children with peanut allergy                                                           | 2012 | Pediatric allergy and immunology : official publication of the European Society of Pediatric Allergy and Immunology    | Excluded at Full-Text Screen | No 2nd dose data          |
| Sole, D. I., J. C.; Borges, M. S.; Coelho, M. A.; Rosario, N. A.; Arduzzo, L.; Bernd, L. A. G.; Latin American Anaphylaxis Working, Group                                    | Anaphylaxis in Latin American children and adolescents: the Online Latin American Survey on Anaphylaxis (OLASA) | 2012 | Allergologia et immunopathologia                                                                                       | Excluded at Full-Text Screen | No 2nd dose data          |
| Silva, R. G., E.; Cunha, L.; Falcao, H.                                                                                                                                      | Anaphylaxis in children: a nine years retrospective study (2001-2009)                                           | 2012 | Allergologia et immunopathologia                                                                                       | Excluded at Full-Text Screen | No 2nd dose data          |
| Orhan, F. C., Y.; Bakirtas, A.; Yilmaz, O.; Boz, A. B.; Can, D.; Kuyucu, S.; Harmanci, K.; Tahan, F.; Reisli, I.; Karakas, T.; Baki, A.; Cokugras, H.; Cakir, M.; Yuksel, H. | Anaphylaxis in Turkish children: a multi-centre, retrospective, case study                                      | 2011 | Clinical and experimental allergy : journal of the British Society for Allergy and Clinical Immunology                 | Excluded at Full-Text Screen | No 2nd dose data          |
| Lertnawapan, R. M.-a.-n., Wirach                                                                                                                                             | Anaphylaxis and biphasic phase in Thailand: 4-year observation                                                  | 2011 | Allergology international : official journal of the Japanese Society of Allergology                                    | Excluded at Full-Text Screen | Exclude for other reasons |
| Hoffer, V. S., O.; Marcus, N.; Levy, Y.; Segal, N.; Lagovsky, I.; Monselise, Y.; Garty, B. Z.                                                                                | Anaphylaxis in Israel: experience with 92 hospitalized children                                                 | 2011 | Pediatric allergy and immunology : official publication of the European Society of Pediatric Allergy and Immunology    | Excluded at Full-Text Screen | No 2nd dose data          |
| Techapornroong, M. A., Krittapoom; Cheungpasitporn, Wisit; Ruxrungham, Kiat                                                                                                  | Anaphylaxis: a ten years inpatient retrospective study                                                          | 2010 | Asian Pacific journal of allergy and immunology                                                                        | Excluded at Full-Text Screen | No 2nd dose data          |
| Rudders, S. A. B., Aleena; Corel, Blanka; Clark, Sunday; Camargo, Carlos A., Jr.                                                                                             | Multicenter study of repeat epinephrine treatments for food-related anaphylaxis                                 | 2010 | Pediatrics                                                                                                             | Excluded at Full-Text Screen | No 2nd dose data          |
| Russell, S. M., Kathy; Losek, Joseph D.                                                                                                                                      | Anaphylaxis management in the pediatric emergency department: opportunities for improvement                     | 2010 | Pediatric emergency care                                                                                               | Excluded at Full-Text Screen | No 2nd dose data          |
| Piromrat, K. C., Sasawan; Trathong, Sommai                                                                                                                                   | Anaphylaxis in an emergency department: a 2-year study in a tertiary-care hospital                              | 2008 | Asian Pacific journal of allergy and immunology                                                                        | Excluded at Full-Text Screen | No 2nd dose data          |
| Melville, N. B., T.                                                                                                                                                          | Paediatric allergic reactions in the emergency department: a review                                             | 2008 | Emergency medicine journal : EMJ                                                                                       | Excluded at Full-Text Screen | No 2nd dose data          |
| Jirapongsananuruk, O. B., Wicharn; Piyaphanee, Nuntawan; Visitsunthorn, Nualanong; Thongngarm, Torpong; Vichyanond, Pakit                                                    | Features of patients with anaphylaxis admitted to a university hospital                                         | 2007 | Annals of allergy, asthma & immunology : official publication of the American College of Allergy, Asthma, & Immunology | Excluded at Full-Text Screen | No 2nd dose data          |
| Braganza, S. C. A., J. P.; McKinnon, D. R. L.; Peake, J. E.; Brown, A. F. T.                                                                                                 | Paediatric emergency department anaphylaxis: different patterns from adults                                     | 2006 | Archives of disease in childhood                                                                                       | Excluded at Full-Text Screen | No 2nd dose data          |
| Mehl, A. W., U.; Niggemann, B.                                                                                                                                               | Anaphylactic reactions in children--a questionnaire-based survey in Germany                                     | 2005 | Allergy                                                                                                                | Excluded at Full-Text Screen | No 2nd dose data          |
| Clark, S. L., Aidan A.; Gaeta, Theodore J.; Camargo, Carlos A., Jr.                                                                                                          | Multicenter study of emergency department visits for insect sting allergies                                     | 2005 | The Journal of allergy and clinical immunology                                                                         | Excluded at Full-Text Screen | Exclude for other reasons |



|                                                                                                                                                                         |                                                                                                                                                            |      |                                                                                                                        |                              |                           |
|-------------------------------------------------------------------------------------------------------------------------------------------------------------------------|------------------------------------------------------------------------------------------------------------------------------------------------------------|------|------------------------------------------------------------------------------------------------------------------------|------------------------------|---------------------------|
| Cianferoni, A. N., Elio; Pucci, Neri; Lombardi, Enrico; Bernardini, Roberto; Vierucci, Alberto                                                                          | Anaphylaxis: a 7-year follow-up survey of 46 children                                                                                                      | 2004 | Annals of allergy, asthma & immunology : official publication of the American College of Allergy, Asthma, & Immunology | Excluded at Full-Text Screen | No 2nd dose data          |
| Clark, S. B., S. Allan; Gaeta, Theodore J.; Brenner, Barry E.; Cydulka, Rita K.; Camargo, Carlos A.; Multicenter Airway Research Collaboration, Investigators           | Multicenter study of emergency department visits for food allergies                                                                                        | 2004 | The Journal of allergy and clinical immunology                                                                         | Excluded at Full-Text Screen | No 2nd dose data          |
| Brown, A. F. M., D.; Chu, K.                                                                                                                                            | Emergency department anaphylaxis: A review of 142 patients in a single year                                                                                | 2001 | The Journal of allergy and clinical immunology                                                                         | Excluded at Full-Text Screen | No 2nd dose data          |
| Cianferoni, A. N., E.; Mugnaini, L.; Lombardi, E.; Bernardini, R.; Pucci, N.; Vierucci, A.                                                                              | Clinical features of acute anaphylaxis in patients admitted to a university hospital: an 11-year retrospective review (1985-1996)                          | 2001 | Annals of allergy, asthma & immunology : official publication of the American College of Allergy, Asthma, & Immunology | Excluded at Full-Text Screen | No 2nd dose data          |
| Pucar, F. K., R.; Lim, H.; Clarke, A. E.                                                                                                                                | Peanut challenge: a retrospective study of 140 patients                                                                                                    | 2001 | Clinical and experimental allergy : journal of the British Society for Allergy and Clinical Immunology                 | Excluded at Full-Text Screen | No 2nd dose data          |
| Lee, J. M. G., D. S.                                                                                                                                                    | Biphasic anaphylactic reactions in pediatrics                                                                                                              | 2000 | Pediatrics                                                                                                             | Excluded at Full-Text Screen | No 2nd dose data          |
| Korenblat, P. L., M. J.; Dankner, R. E.; Day, J. H.                                                                                                                     | A retrospective study of epinephrine administration for anaphylaxis: how many doses are needed?                                                            | 1999 | Allergy and asthma proceedings                                                                                         | Excluded at Full-Text Screen | Exclude for other reasons |
| Stewart, A. G. E., P. W.                                                                                                                                                | The incidence, aetiology and management of anaphylaxis presenting to an accident and emergency department                                                  | 1996 | QJM : monthly journal of the Association of Physicians                                                                 | Excluded at Full-Text Screen | No 2nd dose data          |
| Kemp, S. F. L., R. F.; Wolf, B. L.; Lieberman, P.                                                                                                                       | Anaphylaxis. A review of 266 cases                                                                                                                         | 1995 | Archives of internal medicine                                                                                          | Excluded at Full-Text Screen | No 2nd dose data          |
| Civelek, E. E., M.; Akan, A.; Ozcan, C.; Kaya, A.; Vezir, E.; Ginis, T.; Azkur, D.; Toyran, M.; Tokac, M.; Kocabas, C. N.                                               | The etiology and clinical features of anaphylaxis in a developing country: A nationwide survey in turkey                                                   | 2017 | Asian Pacific Journal of Allergy and Immunology                                                                        | Excluded at Full-Text Screen | No 2nd dose data          |
| Rudders, S. A. C., S.; Camargo, C. A.                                                                                                                                   | Inpatient interventions are infrequent during pediatric hospitalizations for food-induced anaphylaxis                                                      | 2017 | Journal of Allergy and Clinical Immunology: In Practice                                                                | Excluded at Full-Text Screen | No 2nd dose data          |
| van der Valk, J. P. M. B., I.; Gerth van Wijk, R.; Arends, N. J. T.; van Maaren, M. S.; de Groot, H.; Wichers, H. J.; Emons, J. A. M.; Dubois, A. E. J.; de Jong, N. W. | Small percentage of anaphylactic reactions treated with epinephrine during food challenges in Dutch children                                               | 2018 | Annals of Allergy, Asthma and Immunology                                                                               | Excluded at Full-Text Screen | No 2nd dose data          |
| Kennard, L. T., I.; Rutkowski, K.; Azzu, V.; Yong, P. F. K.; Kasternow, B.; Hunter, H.; Cabdi, N. M. O.; Nakonechna, A.; Wagner, A.                                     | A Multicenter Evaluation of Diagnosis and Management of Omega-5 Gliadin Allergy (Also Known as Wheat-Dependent Exercise-Induced Anaphylaxis) in 132 Adults | 2018 | Journal of Allergy and Clinical Immunology: In Practice                                                                | Excluded at Full-Text Screen | No 2nd dose data          |
| Ito, K. O., M.; Kando, N.; Matsui, T.; Nakagawa, T.; Sugiura, S.; Ebisawa, M.                                                                                           | Surveillance of the use of adrenaline auto-injectors in Japanese children                                                                                  | 2018 | Allergology International                                                                                              | Excluded at Full-Text Screen | No 2nd dose data          |
| Al Enezi, M. L., G.; Fox, A. T.; Anagnostou, K.                                                                                                                         | Safety and allergic reaction profiles of children undergoing baked milk and egg challenges: a 6-year experience from a pediatric tertiary referral center  | 2018 | Journal of Allergy and Clinical Immunology: In Practice                                                                | Excluded at Full-Text Screen | No 2nd dose data          |

|                                                                                                                                                                                                                         |                                                                                                                                                                |      |                                                   |                              |                  |
|-------------------------------------------------------------------------------------------------------------------------------------------------------------------------------------------------------------------------|----------------------------------------------------------------------------------------------------------------------------------------------------------------|------|---------------------------------------------------|------------------------------|------------------|
| Kim, S. Y. K., M. H.; Cho, Y. J.                                                                                                                                                                                        | Different clinical features of anaphylaxis according to cause and risk factors for severe reactions                                                            | 2018 | Allergology International                         | Excluded at Full-Text Screen | No 2nd dose data |
| Sasaki, M. K., J. J.; Dharmage, S. C.; Field, M. J.; Sawyer, S. M.; McWilliam, V.; Peters, R. L.; Gurrin, L. C.; Vuillermin, P. J.; Douglass, J.; Pezic, A.; Brewerton, M.; Tang, M. L. K.; Patton, G. C.; Allen, K. J. | Prevalence of clinic-defined food allergy in early adolescence: The SchoolNuts study                                                                           | 2018 | Journal of Allergy and Clinical Immunology        | Excluded at Full-Text Screen | No 2nd dose data |
| Zahabi, S. C., A.; Gabrielli, S.; Moissan, J.; Eisman, H.; Morris, J.; Chan, E. S.; Shand, G.; Shoshan, M. B.                                                                                                           | Venom triggered anaphylaxis cases management and clinical characteristics in Canada                                                                            | 2017 | Allergy, Asthma and Clinical Immunology           | Excluded at Full-Text Screen | No 2nd dose data |
| Mevius, H. W., M.; Vriesman, W.                                                                                                                                                                                         | Pediatric anaphylaxis in the Emergency Department: Incidence, provocative factors and use of epinephrine                                                       | 2018 | Clinical and Translational Allergy                | Excluded at Full-Text Screen | No 2nd dose data |
| Aviles, B. G. L., N. M.; Perez, T. T.; Gil, L. M.; Posada, C. M.; Caballero, M. C.; Rovira, P. M.; Almarcha, T. A.; Arnau, M. J. F.; Toro, C. G.; Garde, J. G.                                                          | Review of oral food challenge tests in children                                                                                                                | 2018 | Clinical and Translational Allergy                | Excluded at Full-Text Screen | No 2nd dose data |
| Adeli, M. A., K.; AlShami, A.; Nisar, S.                                                                                                                                                                                | Etiology and characteristics of patients presenting with anaphylaxis to the Pediatric Emergency Centers in Qatar                                               | 2018 | Clinical and Translational Allergy                | Excluded at Full-Text Screen | No 2nd dose data |
| Geddes, K. R. R., N.                                                                                                                                                                                                    | Recognition of paediatric anaphylaxis-an audit of allergy admissions to our emergency department                                                               | 2018 | Archives of Disease in Childhood                  | Excluded at Full-Text Screen | No 2nd dose data |
| Le, M. C., A. E.; Eisman, H.; Morris, J.; Gravel, J.; Chan, E. S.; Lim, R.; O'Keefe, A.; Shand, G.; Ben-Shoshan, M.                                                                                                     | Emergency management of pediatric anaphylaxis due to an unknown cause: A 5-year follow-up study in Canada                                                      | 2018 | Journal of Allergy and Clinical Immunology        | Excluded at Full-Text Screen | No 2nd dose data |
| Alshami, A. A., M.; Alyafei, K.; Nisar, S.                                                                                                                                                                              | Anaphylaxis presenting to the pediatric emergency centers in Qatar                                                                                             | 2018 | Journal of Allergy and Clinical Immunology        | Excluded at Full-Text Screen | No 2nd dose data |
| Ruiz, J. C. Z., V.; Ben-Shoshan, M.; Tariq, H.; Sheppard, T.; Asai, Y.; Adatia, A.; Yanishevsky, Y.; Chan, E. S.; Shand, G.; Chin, R.; Clarke, A. E.                                                                    | Cross-Canada anaphylaxis registry (C-CARE): Comparing rates, triggers, and management of anaphylaxis in a single centre emergency department (ED) over 4 years | 2018 | Journal of Allergy and Clinical Immunology        | Excluded at Full-Text Screen | No 2nd dose data |
| Lee, J. S. W., M.                                                                                                                                                                                                       | Characteristics of anaphylaxis and management in a midwestern hospital system                                                                                  | 2018 | Journal of Allergy and Clinical Immunology        | Excluded at Full-Text Screen | No 2nd dose data |
| Chooniedass, R. T., B.; Martin, D.; Becker, A.                                                                                                                                                                          | Reflections on the use of epinephrine for anaphylaxis                                                                                                          | 2017 | Allergy, Asthma and Clinical Immunology           | Excluded at Full-Text Screen | No 2nd dose data |
| Brooks, C. C., A.; Erwin, E.; Mikhail, I.                                                                                                                                                                               | Diagnosis and treatment of food allergic reactions in pediatric emergency settings                                                                             | 2017 | Annals of Allergy, Asthma and Immunology          | Excluded at Full-Text Screen | No 2nd dose data |
| Nabavi, M. L., M.; Arshi, S.; Bemanian, M. H.; Esmaeilzadeh, H.; Molatefi, R.; Rekabi, M.; Ahmadian, J.; Eslami, N.; Shokri, S.; Darabi, K.; Sedighi, G. R.; Fallahpour, M.                                             | Characteristics, etiology and treatment of pediatric and adult anaphylaxis in Iran                                                                             | 2017 | Iranian Journal of Allergy, Asthma and Immunology | Excluded at Full-Text Screen | No 2nd dose data |

|                                                                                                                                                                |                                                                                                                                                                                                   |      |                                                              |                              |                           |
|----------------------------------------------------------------------------------------------------------------------------------------------------------------|---------------------------------------------------------------------------------------------------------------------------------------------------------------------------------------------------|------|--------------------------------------------------------------|------------------------------|---------------------------|
| Feuille, E. L., C.; Volel, C.; Sicherer, S. H.; Wang, J.                                                                                                       | Time Trends in Food Allergy Diagnoses, Epinephrine Orders, and Epinephrine Administrations in New York City Schools                                                                               | 2017 | Journal of Pediatrics                                        | Excluded at Full-Text Screen | No 2nd dose data          |
| Akuete, K. G., D.; Israelsen, R. B.; Broyles, J. M.; Higgins, L. J.; Green, T. D.; Naimi, D. R.; MacGinnitie, A. J.; Vitalpur, G.; Minard, C. G.; Davis, C. M. | Multicenter prevalence of anaphylaxis in clinic-based oral food challenges                                                                                                                        | 2017 | Annals of Allergy, Asthma and Immunology                     | Excluded at Full-Text Screen | No 2nd dose data          |
| Ali, F.                                                                                                                                                        | A Survey of Self-Reported Food Allergy and Food-Related Anaphylaxis among Young Adult Students at Kuwait University, Kuwait                                                                       | 2017 | Medical Principles and Practice                              | Excluded at Full-Text Screen | No 2nd dose data          |
| Robinson, M. G., M.; Stukus, D. R.                                                                                                                             | Factors associated with epinephrine administration for anaphylaxis in children before arrival to the emergency department                                                                         | 2017 | Annals of Allergy, Asthma and Immunology                     | Excluded at Full-Text Screen | No 2nd dose data          |
| Wright, C. D. L., M.; Lieberman, P. L.; Lieberman, J. A.                                                                                                       | An analysis of anaphylaxis cases at a single pediatric emergency department during a 1-year period                                                                                                | 2017 | Annals of Allergy, Asthma and Immunology                     | Excluded at Full-Text Screen | No 2nd dose data          |
| Golovin, B. C., O.; Ghidirimschi, A.; Bagrinovschi, M.                                                                                                         | Incidence and management of anaphylaxis in prehospital                                                                                                                                            | 2017 | Critical Care                                                | Excluded at Full-Text Screen | No 2nd dose data          |
| White, M. H., C.; Muniz, R.                                                                                                                                    | Characteristics of anaphylactic events in schools: Results of the 2015-2016 EpiPen4Schools survey                                                                                                 | 2017 | Annals of Allergy, Asthma and Immunology                     | Excluded at Full-Text Screen | No 2nd dose data          |
| Sindher, S. L., A.; Tupa, D.; Andorf, S.; Purington, N.; Chinthrajah, R.; Nadeau, K.                                                                           | Age-related variations in reactions during positive oral food challenge to peanut protein                                                                                                         | 2017 | Annals of Allergy, Asthma and Immunology                     | Excluded at Full-Text Screen | No 2nd dose data          |
| Azevedo, J. G., A.; Mota, I.; Correia, M.; Benito-Garcia, F.; Piedade, S.; Borrego, L. M.; Morais-Almeida, M.                                                  | Anaphylaxis induced by tree nuts in preschool age children                                                                                                                                        | 2017 | Allergy: European Journal of Allergy and Clinical Immunology | Excluded at Full-Text Screen | No 2nd dose data          |
| Topalusic, I. I. J., I.; Cavcic, A.; Navratil, M.                                                                                                              | Anaphylaxis in children-our experience                                                                                                                                                            | 2017 | Allergy: European Journal of Allergy and Clinical Immunology | Excluded at Full-Text Screen | No 2nd dose data          |
| Coskun, R. D., S.; Unal, D.; Olgac, M.; Gelincik, A.; Colakoglu, B.; Buyukozturk, S.                                                                           | Factors influencing anaphylaxis severity                                                                                                                                                          | 2017 | Allergy: European Journal of Allergy and Clinical Immunology | Excluded at Full-Text Screen | No 2nd dose data          |
| Tagaro, I. A. D. V., M. B.                                                                                                                                     | Anaphylaxis management in the emergency department of a tertiary hospital in the Philippines                                                                                                      | 2017 | Allergy: European Journal of Allergy and Clinical Immunology | Excluded at Full-Text Screen | No 2nd dose data          |
| Fernandes, R. R., F.; Pita, J.; Faria, E.; Pereira, C.; Todo Bom, A.; Carrapatoso, I.                                                                          | Anaphylaxis in a food allergy outpatient department-one year case series                                                                                                                          | 2017 | Allergy: European Journal of Allergy and Clinical Immunology | Excluded at Full-Text Screen | No 2nd dose data          |
| White, M. V. M., R.; Herrem, C.; Silvia, S.; Hogue, S.                                                                                                         | Anaphylactic triggers in schools: Results of the 2014-2015 EpiPen4Schools survey                                                                                                                  | 2017 | Journal of Allergy and Clinical Immunology                   | Excluded at Full-Text Screen | No 2nd dose data          |
| Vickery, B. P. B., K.; Burks, A. W.; Casale, T. B.; Hourihane, J. O.; Jones, S. M.; Radwan, A.; Vereda, A.; Adelman, D. C.                                     | Outcome of 583 entry double-blind placebo-controlled peanut challenges during screening for the palisade phase 3 oral immunotherapy trial                                                         | 2017 | Journal of Allergy and Clinical Immunology                   | Excluded at Full-Text Screen | Exclude for other reasons |
| Restivo, L. K. C., A. E.; Moissan, J.; Eisman, H.; Morris, J.; Chan, E. S.; Shand, G.; Shoshan, M. B.                                                          | Clinical characteristics, immediate treatment, and long-term management of venom allergic reactions presenting to canadian pediatric emergency departments and out-of-hospital emergency services | 2017 | Journal of Allergy and Clinical Immunology                   | Excluded at Full-Text Screen | No 2nd dose data          |

|                                                                                                                                                                          |                                                                                                                                   |      |                                                                                                                      |                              |                       |
|--------------------------------------------------------------------------------------------------------------------------------------------------------------------------|-----------------------------------------------------------------------------------------------------------------------------------|------|----------------------------------------------------------------------------------------------------------------------|------------------------------|-----------------------|
| Das, D. R., A.; Clarke, A. E.; Moisan, J.; Chan, E. S.; Eisman, H.; Ben-Shoshan, M.                                                                                      | Longitudinal differences in treatment of anaphylaxis presenting to pre-hospital emergency services in rural quebec                | 2017 | Journal of Allergy and Clinical Immunology                                                                           | Excluded at Full-Text Screen | No 2nd dose data      |
| Adatia, A. B.-S., M.; Clarke, A. E.; Chan, E. S.; Shand, G.; Delaney, S.; Yanishevsky, Y.                                                                                | Rate and management of anaphylaxis in adult patients at a tertiary care centre emergency department                               | 2017 | Journal of Allergy and Clinical Immunology                                                                           | Excluded at Full-Text Screen | No 2nd dose data      |
| Klemans, R. J. L., T. M.; Sigurdsson, V.; Enters-Weijnen, C. F.; van Hoffen, E.; Bruijnzeel-Koomen, C. A.; Knulst, A. C.                                                 | Management of acute food allergic reactions by general practitioners                                                              | 2013 | Eur Ann Allergy Clin Immunol                                                                                         | Excluded at Full-Text Screen | No 2nd dose data      |
| Lieberman, J. A. C., A. L.; Vitale, M.; Sampson, H. A.                                                                                                                   | Outcomes of office-based, open food challenges in the management of food allergy                                                  | 2011 | Journal of Allergy and Clinical Immunology                                                                           | Excluded at Full-Text Screen | <10 cases anaphylaxis |
| Blackman, A. A., S.; Anagnostou, A.                                                                                                                                      | Treatment of anaphylaxis: Are we doing it right?                                                                                  | 2018 | Journal of Allergy and Clinical Immunology                                                                           | Excluded at Full-Text Screen | No 2nd dose data      |
| Mostmans, Y. G., M.; Blykers, M.; Mols, P.; Naeije, N.; Guterth, J.                                                                                                      | Adrenaline in anaphylaxis treatment and self-administration: experience from an inner city emergency department                   | 2017 | Allergy: European Journal of Allergy and Clinical Immunology                                                         | Excluded at Full-Text Screen | No 2nd dose data      |
| O'Keefe, A. C., A.; St. Pierre, Y.; Mill, J.; Asai, Y.; Eisman, H.; La Vieille, S.; Alizadehfar, R.; Joseph, L.; Morris, J.; Gravel, J.; Ben-Shoshan, M.                 | The Risk of Recurrent Anaphylaxis                                                                                                 | 2017 | Journal of Pediatrics                                                                                                | Excluded at Full-Text Screen | No 2nd dose data      |
| Joshi, D. T., J.; Lales, G.; Pittsenbarger, Z.; Yarbrough, M.; Gupta, R. S.; Smith, B.                                                                                   | Disparities in pre-emergency department epinephrine and antihistamine use for anaphylaxis                                         | 2017 | Journal of Allergy and Clinical Immunology                                                                           | Excluded at Full-Text Screen | No 2nd dose data      |
| Ko, B. S. K., W. Y.; Ryoo, S. M.; Ahn, S.; Sohn, C. H.; Seo, D. W.; Lee, Y. S.; Lim, K. S.; Kim, T. B.                                                                   | Biphasic reactions in patients with anaphylaxis treated with corticosteroids                                                      | 2015 | Annals of Allergy, Asthma and Immunology                                                                             | Excluded at Full-Text Screen | No 2nd dose data      |
| Hitti, E. A. Z., F.; Harmouche, E.; Saliba, M.; Mufarrij, A.                                                                                                             | Acute allergic reactions in the emergency department: Characteristics and management practices                                    | 2015 | European Journal of Emergency Medicine                                                                               | Excluded at Full-Text Screen | No 2nd dose data      |
| Guzman, M. A., B.; Morales, C.; Zambrano, G.; Rodriguez, A.; Baeza, M. L.; Alvarez-Perea, A.                                                                             | Characteristics of anaphylaxis in a pediatric emergency department                                                                | 2015 | Allergy: European Journal of Allergy and Clinical Immunology                                                         | Excluded at Full-Text Screen | No 2nd dose data      |
| Yanishevsky, Y. C., A. E.; Vieille, S. L.; Delaney, S.; Alizadehfar, R.; Mill, C.; Joseph, L.; Morris, J.; Asai, Y.; Ben-Shoshan, M.                                     | Managing anaphylaxis in adults: A review of all cases presenting in a single year at an emergency department                      | 2014 | Journal of Allergy and Clinical Immunology                                                                           | Excluded at Full-Text Screen | No 2nd dose data      |
| Aston, A., P. Turner, M. Ruiz-Garcia, R. Boyle and S. Brown                                                                                                              | Assessing severity of peanut-allergic reactions during research food challenges                                                   | 2016 | World Allergy Organization Journal. Conference: 4th WAO International Scientific Conference, WISC                    | Excluded at Full-Text Screen | No 2nd dose data      |
| Pouessel, G., V. Cerbelle, S. Lejeune, S. Leteurtre, N. Ramdane and A. Deschildre                                                                                        | Anaphylaxis admissions in pediatric intensive care units: Follow-up and risk of recurrence                                        | 2018 | Pediatric allergy and immunology : official publication of the European Society of Pediatric Allergy and Immunology. | Excluded at Full-Text Screen | No 2nd dose data      |
| Gabrielli, S., A. Clarke, J. Morris, H. Eisman, J. Gravel, P. Enarson, E. S. Chan, J. Gerdt, A. O'Keefe, R. Porter, R. Lim, Y. Yanishevsky, A. Adatia and M. Ben-Shoshan | Teenagers and those with severe reactions are more likely to use their epinephrine autoinjector in cases of anaphylaxis in Canada | 2019 | Journal of Allergy and Clinical Immunology: In Practice                                                              | Excluded at Full-Text Screen | No 2nd dose data      |

|                                                                                                                                                                                           |                                                                                                                                                  |      |                                                                                                                                                 |                              |                                  |
|-------------------------------------------------------------------------------------------------------------------------------------------------------------------------------------------|--------------------------------------------------------------------------------------------------------------------------------------------------|------|-------------------------------------------------------------------------------------------------------------------------------------------------|------------------------------|----------------------------------|
| Reier-Nilsen, T., M. M. Michelsen, K. C. Lodrup Carlsen, K. H. Carlsen, P. Mowinckel, U. C. Nygaard, E. Namork, M. P. Borres and G. Haland                                                | Feasibility of desensitizing children highly allergic to peanut by high-dose oral immunotherapy                                                  | 2019 | Allergy: European Journal of Allergy and Clinical Immunology                                                                                    | Excluded at Full-Text Screen | No 2nd dose data                 |
| Kaupila, T. K., M. Paasilta, A. K. Kukkonen, M. Kuitunen, A. S. Pelkonen and M. J. Makela                                                                                                 | Outcome of oral immunotherapy for persistent cow's milk allergy from 11 years of experience in Finland                                           | 2019 | Pediatric Allergy and Immunology.                                                                                                               | Excluded at Full-Text Screen | No 2nd dose data                 |
| Andrew, E., Z. Nehme, S. Bernard and K. Smith                                                                                                                                             | Pediatric Anaphylaxis in the Prehospital Setting: Incidence, Characteristics, and Management                                                     | 2018 | Prehospital emergency care : official journal of the National Association of EMS Physicians and the National Association of State EMS Directors | Excluded at Full-Text Screen | No 2nd dose data                 |
| Kawahara, T., J. Tezuka, T. Ninomiya, S. Honjo, N. Masumoto, M. Nanishi, H. Nakayama and S. Ohga                                                                                          | Risk prediction of severe reaction to oral challenge test of cow's milk                                                                          | 2019 | European Journal of Pediatrics                                                                                                                  | Excluded at Full-Text Screen | No 2nd dose data                 |
| Cho, H., D. Kim, Y. Choo, J. Park, J. Choi, D. Jang, T. Kim, J. W. Jeong and J. W. Kwon                                                                                                   | Common causes of emergency department visits for anaphylaxis in Korean community hospitals: A cross-sectional study                              | 2019 | Medicine                                                                                                                                        | Excluded at Full-Text Screen | No 2nd dose data                 |
| Dubus, J. C., M. S. Le, J. Vitte, P. Minodier, A. Boutin, A. Carsin, G. Viudes and G. Noel                                                                                                | Use of epinephrine in emergency department depends on anaphylaxis severity in children                                                           | 2019 | European Journal of Pediatrics                                                                                                                  | Excluded at Full-Text Screen | No 2nd dose data                 |
| Capucilli, P., K. Kennedy, J. Lee, R. Grundmeier and J. M. Spergel                                                                                                                        | Accidental Food Reactions Requiring Emergency Department Evaluation in Children with Food Allergy are Rare                                       | 2019 | Journal of Allergy and Clinical Immunology                                                                                                      | Excluded at Full-Text Screen | No 2nd dose data                 |
| Ghrooda, M. A., M. Ben-Shoshan, A. E. Clarke, J. Moisan, B. Miles and G. Shand                                                                                                            | Cross- Canada Anaphylaxis Registry: comparing triggers and management of anaphylaxis in emergency medical service in Quebec over a 4-year period | 2019 | Journal of Allergy and Clinical Immunology                                                                                                      | Excluded at Full-Text Screen | No 2nd dose data                 |
| Dickson, M. A., C. W. Ng, K. Neupert and P. Varshney                                                                                                                                      | Epinephrine Administration Trends in a Large Urban School District After Implementing Unassigned Epinephrine                                     | 2019 | Journal of Allergy and Clinical Immunology                                                                                                      | Excluded at Full-Text Screen | No 2nd dose data                 |
| Patel, N., M. Vazquez-Ortiz, A. Robb, M. H. Shamji, D. E. Campbell and P. J. Turner                                                                                                       | Successful Desensitisation And Sustained Unresponsiveness Using Modified Peanut: Results From The BOPI Study                                     | 2019 | Journal of Allergy and Clinical Immunology                                                                                                      | Excluded at Full-Text Screen | No 2nd dose data                 |
| Knox, S. M. and B. C. Schroer                                                                                                                                                             | Use Of Emergency Resources During In Office Oral Food Challenges                                                                                 | 2019 | Journal of Allergy and Clinical Immunology                                                                                                      | Excluded at Full-Text Screen | Multiple publications of dataset |
| Vickery, B. P., A. Vereda, T. B. Casale, K. Beyer, G. D. Toit, J. O. Hourihane, S. M. Jones, W. G. Shreffler, A. Marcantonio, R. Zawadzki, S. G. Dilly, D. C. Adelman and A. Wesley Burks | AR101 oral immunotherapy for peanut allergy                                                                                                      | 2018 | New England Journal of Medicine                                                                                                                 | Excluded at Full-Text Screen | No 2nd dose data                 |
| Reynolds, C., L. Denny, S. Al-Badri and S. O'Connor                                                                                                                                       | Management of anaphylaxis in a tertiary emergency department-A retrospective review                                                              | 2018 | Internal Medicine Journal                                                                                                                       | Excluded at Full-Text Screen | No 2nd dose data                 |

|                                                                                                                                                                                                                                                                                                                                                                                                                                                                                                                                                                       |                                                                                                                                   |      |                                                                      |                              |                  |
|-----------------------------------------------------------------------------------------------------------------------------------------------------------------------------------------------------------------------------------------------------------------------------------------------------------------------------------------------------------------------------------------------------------------------------------------------------------------------------------------------------------------------------------------------------------------------|-----------------------------------------------------------------------------------------------------------------------------------|------|----------------------------------------------------------------------|------------------------------|------------------|
| Capucilli, P., A. Cianferoni, J. Fiedler, L. Gober, N. Pawlowski, G. Ram, R. Saltzman, J. M. Spergel and J. Heimall                                                                                                                                                                                                                                                                                                                                                                                                                                                   | Differences in egg and milk food challenge outcomes based on tolerance to the baked form                                          | 2018 | Annals of Allergy, Asthma and Immunology                             | Excluded at Full-Text Screen | No 2nd dose data |
| Araki, M., Y. Hamahata, M. Usui and M. Akashi                                                                                                                                                                                                                                                                                                                                                                                                                                                                                                                         | Use of multiple doses of adrenaline for food-induced anaphylaxis. (Japanese)                                                      | 2018 | Japanese Journal of Allergology                                      | Excluded at Full-Text Screen | No 2nd dose data |
| Kitamura, K., Y. Takasato, T. Matsui, S. Sugiura and K. Ito                                                                                                                                                                                                                                                                                                                                                                                                                                                                                                           | A dosing interval of 40 minutes is favorable in comparison to 30 minutes for a safe oral food challenges with hen's egg and wheat | 2018 | Allergy: European Journal of Allergy and Clinical Immunology         | Excluded at Full-Text Screen | No 2nd dose data |
| Pouessel, G., F. Chagnon, C. Trochu, J. Labreuche, S. Lejeune, M. Recher, A. Deschildre, S. Leteurtre, P. Tourneux, G. Boussicault, G. Thiriez, O. Brissaud, A. Garenne, M. Jokic, I. Petit, D. Semama, J. Bergounioux, T. Debillon, I. Wroblewski, A. Dorkenoo, E. Mallet, E. Javouhey, B. Vanel, R. Vialet, F. Michel, G. Cambonie, C. Milesi, N. Boussard, N. Joram, D. Dupont, P. Tissieres, S. Dauger, S. Renolleau, J. L. Leger, T. Mansir, J. P. Saulnier, N. Bednarek, O. Tirel, T. Blanc, H. Patural, D. Astruc, M. O. Marcoux, R. Amadiou and J. Chantreuil | Anaphylaxis admissions to pediatric intensive care units in France                                                                | 2018 | Allergy: European Journal of Allergy and Clinical Immunology         | Excluded at Full-Text Screen | No 2nd dose data |
| Ruiz Oropeza, A., A. Lassen, S. Halcken, C. Bindslev-Jensen and C. G. Mortz                                                                                                                                                                                                                                                                                                                                                                                                                                                                                           | Anaphylaxis in an emergency care setting: a one year prospective study in children and adults                                     | 2017 | Scandinavian journal of trauma, resuscitation and emergency medicine | Excluded at Full-Text Screen | No 2nd dose data |
| Yoshida, N., H. Hirata, Y. Fukushima and K. Sugiyama                                                                                                                                                                                                                                                                                                                                                                                                                                                                                                                  | Survey on the proper use of an adrenaline autoinjector in 551 Japanese outdoor workers after hymenopterastings                    | 2018 | Journal of Allergy and Clinical Immunology                           | Excluded at Full-Text Screen | No 2nd dose data |
| Adeli, M., K. Alyafei, S. I. Chaudhry and S. Nisar                                                                                                                                                                                                                                                                                                                                                                                                                                                                                                                    | Incidence, etiology and characteristics of adult onset anaphylaxis in Qatar                                                       | 2018 | Journal of Allergy and Clinical Immunology                           | Excluded at Full-Text Screen | No 2nd dose data |
| Vyas, D., B. Musaddaq, C. Gore and R. Boyle                                                                                                                                                                                                                                                                                                                                                                                                                                                                                                                           | Managing anaphylaxis in the emergency department-what can be done better?                                                         | 2015 | Clinical and Experimental Allergy                                    | Excluded at Full-Text Screen | No 2nd dose data |
| Yoon, L., B. R. Kim, J. Y. Lee, K. Kim, Y. M. Kim, S. H. Kim and H. Y. Kim                                                                                                                                                                                                                                                                                                                                                                                                                                                                                            | Clinical features of anaphylaxis according to age in a single university hospital in Korea                                        | 2017 | Asian Pacific Journal of Allergy and Immunology                      | Excluded at Full-Text Screen | No 2nd dose data |
| Misirlioglu, E. D., E. Vezir, M. Toyran, M. Capanoglu, H. Guvenir, E. Civelek and C. N. Kocabas                                                                                                                                                                                                                                                                                                                                                                                                                                                                       | Clinical diagnosis and management of anaphylaxis in infancy                                                                       | 2017 | Allergy and Asthma Proceedings                                       | Excluded at Full-Text Screen | No 2nd dose data |
| Ruiz Oropeza, A., S. Mikkelsen, C. Bindslev-Jensen and C. G. Mortz                                                                                                                                                                                                                                                                                                                                                                                                                                                                                                    | Pre-hospital treatment of bee and wasp induced anaphylactic reactions: a retrospective study                                      | 2017 | Scandinavian journal of trauma, resuscitation and emergency medicine | Excluded at Full-Text Screen | No 2nd dose data |
| Kim, M., S. Kim, W. Song, Y. Cho and S. Chang                                                                                                                                                                                                                                                                                                                                                                                                                                                                                                                         | Different clinical features of anaphylaxis according to the cause                                                                 | 2017 | Allergy: European Journal of Allergy and Clinical Immunology         | Excluded at Full-Text Screen | No 2nd dose data |
| Sidhu, N., S. Jones, T. Perry, T. Thompson, E. Storm, M. S. Melguizo Castro and T. G. Nick                                                                                                                                                                                                                                                                                                                                                                                                                                                                            | Evaluation of Anaphylaxis Management in a Pediatric Emergency Department                                                          | 2016 | Pediatric Emergency Care                                             | Excluded at Full-Text Screen | No 2nd dose data |

|                                                                                                                             |                                                                                                                                                                                                        |      |                                                                                      |                              |                       |
|-----------------------------------------------------------------------------------------------------------------------------|--------------------------------------------------------------------------------------------------------------------------------------------------------------------------------------------------------|------|--------------------------------------------------------------------------------------|------------------------------|-----------------------|
| Ben Ghezala, H., N. Kouraichi, N. Brahmi, A. Bouguerba, H. Thabet and M. Amamou                                             | Anaphylaxis in a medical intensive care unit: Experience of a Tunisian reference center. (French)                                                                                                      | 2016 | Reanimation                                                                          | Excluded at Full-Text Screen | No 2nd dose data      |
| Dibek Misirlioglu, E., E. Vezir, M. Toyran, M. Capanoglu, H. Guvenir, E. Civelek and C. N. Kocabas                          | Anaphylaxis in children younger than 2 years old: Single center experience                                                                                                                             | 2016 | Allergy: European Journal of Allergy and Clinical Immunology                         | Excluded at Full-Text Screen | No 2nd dose data      |
| Sabouraud-Leclerc, D., E. Beaudouin, A. Chabbert, C. Larue, M. D. Donnou, M. Boulegue, C. Nootens and D. A. Moneret-Vautrin | Food allergy in schools: A report on 56 cases observed by the allergovigilance network between 2005 and 2015. (French)                                                                                 | 2015 | Revue Francaise d'Allergologie                                                       | Excluded at Full-Text Screen | No 2nd dose data      |
| Kim, C. W., J. H. Im and H. Y. Kwon                                                                                         | Characteristics of food-related anaphylaxis in adult: A single center experience                                                                                                                       | 2015 | Allergy: European Journal of Allergy and Clinical Immunology                         | Excluded at Full-Text Screen | No 2nd dose data      |
| Garriga, T., M. Guilarte, L. Ferre, N. Moreno, E. Alcoceba, B. Delavalle, C. Gomez and V. Cardona                           | Dangers of adrenaline use in anaphylaxis: A multicentre register                                                                                                                                       | 2015 | Allergy: European Journal of Allergy and Clinical Immunology                         | Excluded at Full-Text Screen | No 2nd dose data      |
| Abul, M. H., F. Orhan, T. Karakas, Z. I. K. Topcu and A. Baki                                                               | Adherence to the treatment choices of anaphylaxis: An epidemiological view of the pediatric patients                                                                                                   | 2015 | Journal of Allergy and Clinical Immunology                                           | Excluded at Full-Text Screen | No 2nd dose data      |
| Strothman, K., D. Scherzer, P. Mustillo and R. Scherzer                                                                     | Inpatient management and discharge planning for children admitted for food-induced anaphylaxis                                                                                                         | 2015 | Journal of Allergy and Clinical Immunology                                           | Excluded at Full-Text Screen | No 2nd dose data      |
| Oya, S., T. Nakamori and H. Kinoshita                                                                                       | Incidence and characteristics of biphasic and protracted anaphylaxis: Evaluation of 114 inpatients                                                                                                     | 2014 | Acute Medicine and Surgery                                                           | Excluded at Full-Text Screen | No 2nd dose data      |
| Katsunuma, T., K. Akashi and M. Watanabe                                                                                    | Anaphylaxis in children: Demographic and clinical features and triggers                                                                                                                                | 2014 | Allergy: European Journal of Allergy and Clinical Immunology                         | Excluded at Full-Text Screen | No 2nd dose data      |
| Battisti, A., F. Lazzarotto, R. Bonaguro and A. Muraro                                                                      | Anaphylaxis surveillance project in North Eastern Italy. Research grant 309/2009 Veneto Region                                                                                                         | 2014 | Allergy: European Journal of Allergy and Clinical Immunology                         | Excluded at Full-Text Screen | No 2nd dose data      |
| Goolsby, A. L., H. Minto, A. Perkins and K. M. Maples                                                                       | Abbreviated oral food challenge as a safe and effective alternative for diagnosing food allergy in a pediatric clinic                                                                                  | 2014 | Journal of Allergy and Clinical Immunology                                           | Excluded at Full-Text Screen | No 2nd dose data      |
| Rueff, F.                                                                                                                   | Anaphylactic reactions as adverse effects of the allergen-specific immunotherapy. (German)                                                                                                             | 2013 | Allergologie                                                                         | Excluded at Full-Text Screen | No 2nd dose data      |
| Fuzak, J. K. and J. Trainor                                                                                                 | Comparison of the incidence, etiology, and management of anaphylaxis over time                                                                                                                         | 2013 | Pediatric Emergency Care                                                             | Excluded at Full-Text Screen | No 2nd dose data      |
| Lauritano, E. C., A. Novi, M. C. Santoro and I. Casagrande                                                                  | Incidence, clinical features and management of acute allergic reactions: the experience of a single, Italian Emergency Department                                                                      | 2013 | European review for medical and pharmacological sciences                             | Excluded at Full-Text Screen | No 2nd dose data      |
| Vazquez, M., J. Lozano, R. Jimenez, M. Alvaro, O. Dominguez and A. M. Plaza                                                 | Allergic reactions due to cow's milk (CM) doses and triggering factors in 40 CM anaphylactic children during maintenance phase of specific oral tolerance induction (SOTI) treatment to CM in our unit | 2011 | Clinical and Translational Allergy. Conference: Food Allergy and Anaphylaxis Meeting | Excluded at Full-Text Screen | No 2nd dose data      |
| Dhariwal, M. and M. Rafeeq                                                                                                  | Emergency department management of insectstingallergic reactions in a community hospital                                                                                                               | 2011 | Annals of Allergy, Asthma and Immunology                                             | Excluded at Full-Text Screen | No 2nd dose data      |
| Wainstein, B. K., J. Studdert, M. Ziegler and J. B. Ziegler                                                                 | Prediction of anaphylaxis during peanut food challenge: Usefulness of the peanut skin prick test (SPT) and specific IgE level                                                                          | 2010 | Pediatric Allergy and Immunology                                                     | Excluded at Full-Text Screen | <10 cases anaphylaxis |

|                                                                                                                                                                                                                    |                                                                                                                                               |      |                                                                                                                                    |                              |                                  |
|--------------------------------------------------------------------------------------------------------------------------------------------------------------------------------------------------------------------|-----------------------------------------------------------------------------------------------------------------------------------------------|------|------------------------------------------------------------------------------------------------------------------------------------|------------------------------|----------------------------------|
| Haynes, A., W. Watson, G. Rex and S. Kapur                                                                                                                                                                         | Review of food challenges in a pediatric tertiary care centre                                                                                 | 2010 | Allergy, Asthma and Clinical Immunology. Conference: Canadian Society of Allergy and Clinical Immunology Annual Scientific Meeting | Excluded at Full-Text Screen | No 2nd dose data                 |
| Esteso, O., A. Sala Cunill, M. Guilarte, M. Labrador, O. Luengo and V. Cardona                                                                                                                                     | A review of anaphylaxis management in the emergency room                                                                                      | 2010 | Allergy: European Journal of Allergy and Clinical Immunology                                                                       | Excluded at Full-Text Screen | Exclude for other reasons        |
| Rodgers, H., N. Ruth and N. Makwana                                                                                                                                                                                | Analysis of children presenting to a Birmingham Hospital Trust with anaphylaxis                                                               | 2009 | Clinical and Experimental Allergy                                                                                                  | Excluded at Full-Text Screen | No 2nd dose data                 |
| Noimark, L., G. A. Khakoo, A. Summerfield, J. Gardner, H. Cox and J. O. Warner                                                                                                                                     | Use and availability of adrenaline auto-injectors in event of anaphylaxis: A pilot study                                                      | 2009 | Clinical and Experimental Allergy                                                                                                  | Excluded at Full-Text Screen | No 2nd dose data                 |
| Pourpak, Z., L. Ghojzadeh, M. Mansouri, H. Mozaffari and A. Farhoudi                                                                                                                                               | Wheat anaphylaxis in children                                                                                                                 | 2007 | Immunological Investigations                                                                                                       | Excluded at Full-Text Screen | No 2nd dose data                 |
| Enrique, E., F. Pineda, T. Malek, J. Bartra, M. Basagana, R. Tella, J. V. Castello, R. Alonso, J. A. De Mateo, T. Cerda-Trias, M. D. M. San Miguel-Moncin, S. Monzon, M. Garcia, R. Palacios and A. Cistero-Bahima | Sublingual immunotherapy for hazelnut food allergy: A randomized, double-blind, placebo-controlled study with a standardized hazelnut extract | 2005 | Journal of Allergy and Clinical Immunology                                                                                         | Excluded at Full-Text Screen | No 2nd dose data                 |
| Bidat, E., F. Rance, T. Baranes and S. Goulamhousen                                                                                                                                                                | Goat's milk and sheep's milk allergies in children in the absence of cow's milk allergy. (French)                                             | 2003 | Revue Francaise d'Allergologie et d'Immunologie Clinique                                                                           | Excluded at Full-Text Screen | No 2nd dose data                 |
| Marguet, C., L. Couderc, T. Blanc, R. Amar, C. Leloet, D. Feray and E. Mallet                                                                                                                                      | Anaphylaxis in children and adolescents: apropos of 44 patients aged 2 months to 15 years. (French)                                           | 1999 | Archives de pediatrie : organe officiel de la Societe francaise de pediatrie                                                       | Excluded at Full-Text Screen | No 2nd dose data                 |
| Rangkakulnuwat, P., K. Sutham and M. Lao-Araya                                                                                                                                                                     | Anaphylaxis: Ten-year retrospective study from a tertiary-care hospital in Northern Thailand                                                  | 2018 | Asian Pacific Journal of Allergy & Immunology                                                                                      | Excluded at Full-Text Screen | No 2nd dose data                 |
| Ghazali, H., M. Gammoudi, A. Yahmadi, G. Chaaebeni, A. Souyah and S. Souissi                                                                                                                                       | Anaphylaxis in an emergency department: Epidemiology, clinical features and management                                                        | 2017 | Tunisie Medicale                                                                                                                   | Excluded at Full-Text Screen | No 2nd dose data                 |
| Blazowski, LJ., Kurzawa, R., Kuna, P., Majak, P.                                                                                                                                                                   | Cluster analysis of 505 real-life food-induced anaphylaxis in children reveals two stable clinical phenotypes                                 | 2020 | Allergy: European Journal of Allergy and Clinical Immunology.                                                                      | Excluded at Full-Text Screen | No 2nd dose data                 |
| Chung, BY., Kim, JC., Kang, SY., Jung, MJ., Kim, HO., Park, CW.                                                                                                                                                    | Anaphylaxis: Five Years' Experience in the Emergency Rooms of Five University Hospitals in Korea                                              | 2020 | Medicina                                                                                                                           | Excluded at Full-Text Screen | No 2nd dose data                 |
| De Vera, MJT.,                                                                                                                                                                                                     | Anaphylaxis diagnosis and management in the Emergency Department of a tertiary hospital in the Philippines                                    | 2020 | Asia Pacific Allergy                                                                                                               | Excluded at Full-Text Screen | No 2nd dose data                 |
| S Dua, Bond, S.: Durham, S. R., Kimber, I., Mills, C., Roberts, G., Skypala, I., Wason, J., Ewan, P., Boyle, R., Clark, A.                                                                                         | Effect of sleep deprivation and exercise on reaction threshold in adults with peanut allergy: A randomized controlled study                   | 2019 | Journal of Allergy and Clinical Immunology                                                                                         | Excluded at Full-Text Screen | No relevant data or other reason |



|                                                                                                                                                                                             |                                                                                                                                          |      |                                                              |                              |                                  |
|---------------------------------------------------------------------------------------------------------------------------------------------------------------------------------------------|------------------------------------------------------------------------------------------------------------------------------------------|------|--------------------------------------------------------------|------------------------------|----------------------------------|
| Edelman, SMK., Makela, M. J.                                                                                                                                                                | Eliciting allergens and treatment of anaphylaxis: Report of the Finnish national anaphylaxis registry                                    | 2019 | Allergy: European Journal of Allergy and Clinical Immunology | Excluded at Full-Text Screen | No 2nd dose data                 |
| Frois, ATC.                                                                                                                                                                                 | Anaphylactic Reactions in the Emergency Department of a Portuguese Tertiary Hospital: Clinical Characterization and Disease Notification | 2019 | Acta Medica Portuguesa                                       | Excluded at Full-Text Screen | <10 anaphylaxis cases            |
| A. S. Gaspar, AS., Faria, E., Camara, R., Rodrigues-Alves, R., Carrapatoso, I., Gomes, E., Pereira, AM., Carneiro-Leao, L., Morais-Almeida, M., Delgado, L., Pedro, E., Branco-Ferreira, M. | Anaphylaxis in Portugal: 10-year SPAIC national survey 2007-2017. (Portuguese)                                                           | 2019 | Revista Portuguesa de Imunoalergologia                       | Excluded at Full-Text Screen | No relevant data or other reason |
| Kraft, MTS., Strothman, K., Moore-Clingenpeel, M., Grayson, MH.                                                                                                                             | M. T. S. Kraft, R.: Strothman, K.: Moore-Clingenpeel, M.: Grayson, M. H.                                                                 | 2019 | Annals of Allergy, Asthma and Immunology                     | Excluded at Full-Text Screen | No relevant data or other reason |
| P. S. Rangkakulnuwat, K.: Lao-Araya, M.                                                                                                                                                     | Anaphylaxis: Ten-year retrospective study from a tertiary-care hospital in Asia                                                          | 2020 | Asian Pacific Journal of Allergy and Immunology              | Excluded at Full-Text Screen | No 2nd dose data                 |

## I. Record Flow: Included References

The references included in the final systematic review

**Table S14:** References included in final meta-analyses (N=76). References where additional information has been provided by study authors is also listed.

| AUTHOR                                                                                                                                                                                             | TITLE                                                                                                               | YR   | JOURNAL                                                      | SCREENING OUTCOME | INFORMATION SOURCE      |
|----------------------------------------------------------------------------------------------------------------------------------------------------------------------------------------------------|---------------------------------------------------------------------------------------------------------------------|------|--------------------------------------------------------------|-------------------|-------------------------|
| Abrams, E. M. C., N.; Becker, A. B.                                                                                                                                                                | Oral food challenge outcomes in a tertiary care allergy center                                                      | 2012 | Journal of Allergy and Clinical Immunology                   | INCLUDED          | Full Text + author data |
| Alen Coutinho I, Ferreira D, Regateiro FS, Pita J, Ferreira M, Martins JF, Fonseca IA, Loureiro C, Todo-Bom A.                                                                                     | Anaphylaxis in an emergency department: a retrospective 10-year study in a tertiary hospital.                       | 2019 | Eur Ann Allergy Clin Immunol.                                | INCLUDED          | Full Text               |
| Alen Coutinho, I., J. Pita, M. Alves, C. Loureiro and A. Todo Bom                                                                                                                                  | Pediatric anaphylaxis-A view from a tertiary hospital emergency department                                          | 2018 | Allergy: European Journal of Allergy and Clinical Immunology | INCLUDED          | Abstract + author data  |
| Alqurashi, W. S., I.; Chan, K.; Neto, G.; Wells, G.                                                                                                                                                | Epidemiology and clinical predictors of biphasic reactions in children with anaphylaxis                             | 2014 | Academic Emergency Medicine                                  | INCLUDED          | Full Text + author data |
| Anvari S, Blackman AC, Anagnostou A.                                                                                                                                                               | Insights into Infant Anaphylaxis                                                                                    | 2019 | J Allergy Clin Immunol Pract.                                | INCLUDED          | Full Text + author data |
| Arana, N. G., J.; Bilbao, A.; Maruri, M.; Suinaga, M.; Escobal, M.                                                                                                                                 | Anaphylaxis: A review of a series                                                                                   | 2009 | Allergy: European Journal of Allergy and Clinical Immunology | INCLUDED          | Abstract                |
| Arkwright, P. D.                                                                                                                                                                                   | Automatic epinephrine device use in children with food allergies                                                    | 2009 | The Journal of allergy and clinical immunology               | INCLUDED          | Full Text + author data |
| Asaumi, T., N. Yanagida, S. Sato, A. Shukuya, M. Nishino and M. Ebisawa                                                                                                                            | Provocation tests for the diagnosis of food-dependent exercise-induced anaphylaxis                                  | 2016 | Pediatric Allergy and Immunology                             | INCLUDED          | Full Text               |
| Banerji, A. R., Susan A.; Corel, Blanka; Garth, Alisha M.; Clark, Sunday; Camargo, Carlos A., Jr.                                                                                                  | Repeat epinephrine treatments for food-related allergic reactions that present to the emergency department          | 2010 | Allergy and asthma proceedings                               | INCLUDED          | Full Text               |
| Ben-Shoshan, M. L. V., Sebastian; Eisman, Harley; Alizadehfar, Reza; Mill, Christopher; Perkins, Emma; Joseph, Lawrence; Morris, Judy; Clarke, Ann                                                 | Anaphylaxis treated in a Canadian pediatric hospital: Incidence, clinical characteristics, triggers, and management | 2013 | The Journal of allergy and clinical immunology               | INCLUDED          | Full Text               |
| Brennan, A. K., S. U. Patil, J. Fleming, J. A. Boyce, E. S. Stieb, M. Nichols, R. S. Iyengar, P. Permaul, J. E. Walter, P. Hesterberg and W. G. Shreffler                                          | Outcomes using a graded protocol for open food challenges                                                           | 2013 | Journal of Allergy and Clinical Immunology                   | INCLUDED          | Abstract +author data   |
| Brown, S. G. A. S., Shelley F.; Fatovich, Daniel M.; Burrows, Sally A.; Holdgate, Anna; Celenza, Antonio; Coulson, Adam; Hartnett, Leanne; Nagree, Yusuf; Cotterell, Claire; Isbister, Geoffrey K. | Anaphylaxis: clinical patterns, mediator release, and severity                                                      | 2013 | The Journal of allergy and clinical immunology               | INCLUDED          | Full Text + author data |

|                                                                                                                                                       |                                                                                                                                                                     |      |                                                              |          |                         |
|-------------------------------------------------------------------------------------------------------------------------------------------------------|---------------------------------------------------------------------------------------------------------------------------------------------------------------------|------|--------------------------------------------------------------|----------|-------------------------|
| Campbell, R. L. B., C. J.; Lee, S.; Bellamkonda, V. R.; Li, J. T. C.; Hagan, J. B.; Lohse, C. M.; Belloio, M. F.                                      | Predictors of repeat epinephrine administration for emergency department patients with anaphylaxis                                                                  | 2015 | Journal of Allergy and Clinical Immunology: In Practice      | INCLUDED | Full Text               |
| Capps, J. A. S., V.; Arkwright, P. D.                                                                                                                 | Prevalence, outcome and pre-hospital management of anaphylaxis by first aiders and paramedical ambulance staff in Manchester, UK                                    | 2010 | Resuscitation                                                | INCLUDED | Full Text + author data |
| Cardona, V., L. Ferre-Ybarz, M. Guilarte, N. Moreno-Perez, C. Gomez-Galan, E. Alcoceba-Borras, M. B. Delavalle and T. Garriga-Baraut                  | Safety of Adrenaline Use in Anaphylaxis: a Multicentre Register                                                                                                     | 2017 | International archives of allergy and immunology             | INCLUDED | Full Text               |
| Chung, T. G., L.; Vandenberghe, C.; Couperthwaite, S.; Sookram, S.; Liss, K.; Villa-Roel, C.; Rowe, B. H.                                             | Pre-hospital management of anaphylaxis in one Canadian Urban Centre                                                                                                 | 2014 | Resuscitation                                                | INCLUDED | Full Text + author data |
| De Swert, L. F. A. B., Dominique; Raes, Marc; Dermaux, Anna-Maria                                                                                     | Anaphylaxis in referred pediatric patients: demographic and clinical features, triggers, and therapeutic approach                                                   | 2008 | European journal of pediatrics                               | INCLUDED | Full Text               |
| Dibs, S. D. and M. D. Baker                                                                                                                           | Anaphylaxis in children: a 5-year experience                                                                                                                        | 1997 | Pediatrics                                                   | INCLUDED | Full Text               |
| Dogru, M. B., I.; Ozmen, S.; Ginis, T.; Senol, H. D.                                                                                                  | The features of anaphylaxis cases followed in the Pediatric allergy clinic                                                                                          | 2017 | Guncel Pediatri                                              | INCLUDED | Full Text + author data |
| Dribin, T. E., K. A. Michelson, M. C. Monuteaux, A. M. Stack, K. S. Farbman, L. C. Schneider and M. I. Neuman                                         | Identification of children with anaphylaxis at low risk of receiving acute inpatient therapies                                                                      | 2019 | PLoS ONE                                                     | INCLUDED | Full Text               |
| Elizur, A., M. Y. Appel, L. Nachshon, M. B. Levy, N. Epstein-Rigbi, K. Golobov and M. R. Goldberg                                                     | NUT Co Reactivity - ACquiring Knowledge for Elimination Recommendations (NUT CRACKER) study                                                                         | 2018 | Allergy: European Journal of Allergy and Clinical Immunology | INCLUDED | Full Text + author data |
| Ellis, A. K. D., J. H.                                                                                                                                | Incidence and characteristics of biphasic anaphylaxis: A prospective evaluation of 103 patients                                                                     | 2007 | Annals of Allergy, Asthma and Immunology                     | INCLUDED | Full Text + author data |
| Ewan, P. W.Clark, A. T.                                                                                                                               | Efficacy of a management plan based on severity assessment in longitudinal and case-controlled studies of 747 children with nut allergy: Proposal for good practice | 2005 | Clinical and Experimental Allergy                            | INCLUDED | Full Text               |
| Ewan, P. W.Clark, A. T.                                                                                                                               | Good prognosis, clinical features, and circumstances of peanut and tree nut reactions in children treated by a specialist allergy center                            | 2008 | Journal of Allergy and Clinical Immunology                   | INCLUDED | Full Text               |
| Ewan, P. W.Clark, A. T.                                                                                                                               | Long-term prospective observational study of patients with peanut and nut allergy after participation in a management plan                                          | 2001 | Lancet                                                       | INCLUDED | Full Text               |
| Farias Aquino, E. G. T. A., M. A.; Mugica Garica, M. V.; Moro Moro, M.; Vila Albelda, C.; Rosado Ingelmo, A.; Gomez Traseira, C.; Tobon Franco, J. D. | Factors for the use of one or more doses of adrenaline in anaphylaxis episodes attended in a general hospital                                                       | 2013 | Allergy: European Journal of Allergy and Clinical Immunology | INCLUDED | Abstract +author data   |
| Gabrielli S, Clarke A, Morris J, Eisman H, Gravel J, Enarson P, Chan ES, O'Keefe A, Porter R, Lim R, Yanishevsky Y, Gerdtz J,                         | Evaluation of Prehospital Management in a Canadian Emergency Department Anaphylaxis Cohort                                                                          | 2019 | J Allergy Clin Immunol Pract.                                | INCLUDED | Full Text               |

|                                                                                                                                                                                                                                                                                      |                                                                                                                                       |      |                                                              |          |                         |
|--------------------------------------------------------------------------------------------------------------------------------------------------------------------------------------------------------------------------------------------------------------------------------------|---------------------------------------------------------------------------------------------------------------------------------------|------|--------------------------------------------------------------|----------|-------------------------|
| Adatia A, LaVieille S, Zhang X, Ben-Shoshan M                                                                                                                                                                                                                                        |                                                                                                                                       |      |                                                              |          |                         |
| Giclas, H. E., M. L. Robinson, A. A. Phillips, C. B. Santos and B. J. Lanser                                                                                                                                                                                                         | Comparison of Anaphylaxis Criteria with Outpatient Oral Food Challenge Outcomes                                                       | 2019 | Journal of Allergy and Clinical Immunology                   | INCLUDED | Abstract +author data   |
| Goh, S. H. S., J. Y.; Loh, W.; Lee, K. P.; Tan, S. C.; Heng, W. J. K.; Ibrahim, I.; Lee, B. W.; Chiang, W. C.                                                                                                                                                                        | Cause and clinical presentation of anaphylaxis in Singapore: From infancy to old age                                                  | 2018 | International Archives of Allergy and Immunology             | INCLUDED | Full Text + author data |
| Gold, M. S. and R. Sainsbury                                                                                                                                                                                                                                                         | First aid anaphylaxis management in children who were prescribed an epinephrine autoinjector device (EpiPen)                          | 2000 | Journal of Allergy and Clinical Immunology                   | INCLUDED | Full Text               |
| Grabenhenrich, L. B. D., S.; Rueff, F.; Renaudin, J. M.; Scherer, K.; Pfohler, C.; Treudler, R.; Koehli, A.; Mahler, V.; Spindler, T.; Lange, L.; Bilo, M. B.; Papadopoulos, N. G.; Hourihane, J. O. B.; Lang, R.; Fernandez-Rivas, M.; Christoff, G.; Cichocka-Jarosz, E.; Worm, M. | Epinephrine in Severe Allergic Reactions: The European Anaphylaxis Register                                                           | 2018 | J Allergy Clin Immunol Pract                                 | INCLUDED | Full Text + author data |
| Hamilton, D. K.                                                                                                                                                                                                                                                                      | Is Emergency Room Care After Home Use Of An Epinephrine Auto Injector Always Needed?                                                  | 2019 | Journal of Allergy and Clinical Immunology                   | INCLUDED | Abstract +author data   |
| Hsiao, K. C. T., D.; Robinson, M.; Simmons, J.; Smart, J.                                                                                                                                                                                                                            | Safety of paediatric oral food challenges in a tertiary private hospital                                                              | 2014 | Internal Medicine Journal                                    | INCLUDED | Abstract                |
| Huang, F. C., Kanwaljit; Jarvinen, Kirsi M.; Nowak-Wegrzyn, Anna                                                                                                                                                                                                                     | Anaphylaxis in a New York City pediatric emergency department: triggers, treatments, and outcomes                                     | 2012 | The Journal of allergy and clinical immunology               | INCLUDED | Full Text               |
| Inoue, N. and A. Yamamoto                                                                                                                                                                                                                                                            | Clinical evaluation of pediatric anaphylaxis and the necessity for multiple doses of epinephrine                                      | 2013 | Asia Pacific Allergy                                         | INCLUDED | Full Text + author data |
| Itazawa, T., K. Ito and E. Motohiro                                                                                                                                                                                                                                                  | Severe reaction during oral food challenges in children in a prospective multicenter study                                            | 2013 | Allergy: European Journal of Allergy and Clinical Immunology | INCLUDED | Full Text + author data |
| Jarvinen, K. M. A., Sujitha; Shreffler, Wayne G.; Noone, Sally; Sicherer, Scott H.; Sampson, Hugh A.; Nowak-Wegrzyn, Anna                                                                                                                                                            | Epinephrine treatment is infrequent and biphasic reactions are rare in food-induced reactions during oral food challenges in children | 2009 | The Journal of allergy and clinical immunology               | INCLUDED | Full Text               |
| Jarvinen, K. M. S., Scott H.; Sampson, Hugh A.; Nowak-Wegrzyn, Anna                                                                                                                                                                                                                  | Use of multiple doses of epinephrine in food-induced anaphylaxis in children                                                          | 2008 | The Journal of allergy and clinical immunology               | INCLUDED | Full Text               |
| Johnson, J. M., Andrei; Alving, Kjell; Lidholm, Jonas; Borres, Magnus P.; Nordvall, Lennart                                                                                                                                                                                          | Ten-year review reveals changing trends and severity of allergic reactions to nuts and other foods                                    | 2014 | Acta paediatrica (Oslo, Norway : 1992)                       | INCLUDED | Full Text + author data |
| Kim, M. Y., C. S. Park and J. W. Jeong                                                                                                                                                                                                                                               | Management and educational status of adult anaphylaxis patients at emergency department                                               | 2018 | Korean Journal of Internal Medicine                          | INCLUDED | Full Text               |
| Kondo, A. I., K.; Nagasawa, H.; Takeuchi, I.; Jitsuiki, K.; Ohsaka, H.; Omori, K.; Yanagawa, Y.                                                                                                                                                                                      | An Analysis of Patients with Anaphylaxis Treated by a Physician-Staffed Helicopter                                                    | 2018 | Air Medical Journal                                          | INCLUDED | Full Text               |

|                                                                                                                                 |                                                                                                                                                 |      |                                                                                                                        |          |                         |
|---------------------------------------------------------------------------------------------------------------------------------|-------------------------------------------------------------------------------------------------------------------------------------------------|------|------------------------------------------------------------------------------------------------------------------------|----------|-------------------------|
| Lee, J. G., Jackie P. D.; Brown-Whitehorn, Terri; Spergel, Jonathan M.                                                          | Biphasic reactions in children undergoing oral food challenges                                                                                  | 2013 | Allergy and asthma proceedings                                                                                         | INCLUDED | Full Text + author data |
| Lee, M. and D. R. Stukus                                                                                                        | Pre-hospital use of epinephrine for treatment of anaphylaxis in children and adolescents                                                        | 2015 | Journal of Allergy and Clinical Immunology                                                                             | INCLUDED | Abstract +author data   |
| Lee, S. P., A.; Lohse, C. M.; Hess, E. P.; Campbell, R. L.                                                                      | Further Evaluation of Factors That May Predict Biphasic Reactions in Emergency Department Anaphylaxis Patients                                  | 2017 | Journal of Allergy and Clinical Immunology: In Practice                                                                | INCLUDED | Full Text               |
| Liu, X.Lee, S.Lohse, C. M.Hardy, C. T.Campbell, R. L.                                                                           | Biphasic Reactions in Emergency Department Anaphylaxis Patients: A Prospective Cohort Study                                                     | 2019 | J Allergy Clin Immunol Pract                                                                                           | INCLUDED | Full Text               |
| Manivannan, V. C., Ronna L.; Bellolio, M. Fernanda; Stead, Latha G.; Li, James T. C.; Decker, Wyatt W.                          | Factors associated with repeated use of epinephrine for the treatment of anaphylaxis                                                            | 2009 | Annals of allergy, asthma & immunology : official publication of the American College of Allergy, Asthma, & Immunology | INCLUDED | Full Text               |
| Manivannan, V. H., Robert J.; Hankins, Daniel G.; Bellolio, M. Fernanda; Fedko, Martin G.; Decker, Wyatt W.; Campbell, Ronna L. | Epinephrine use and outcomes in anaphylaxis patients transported by emergency medical services                                                  | 2014 | The American journal of emergency medicine                                                                             | INCLUDED | Full Text               |
| Maris, I. H., J.; O'Sullivan, R.; Daly, D.                                                                                      | Prospective study of the incidence of anaphylaxis in Irish children                                                                             | 2015 | Allergy: European Journal of Allergy and Clinical Immunology                                                           | INCLUDED | Abstract +author data   |
| Mehr, S. Liew, W. K.Tey, D.Tang, M. L.                                                                                          | Clinical predictors for biphasic reactions in children presenting with anaphylaxis                                                              | 2009 | Clin Exp Allergy                                                                                                       | INCLUDED | Full Text               |
| Mulligan, K. D., G.; Campbell, T.; Campbell, D.; Mehr, S.                                                                       | Open food challenges in the office: Are they safe?                                                                                              | 2014 | Internal Medicine Journal                                                                                              | INCLUDED | Abstract +author data   |
| Nagakura, K. I., S. Sato, N. Yanagida, M. Nishino, T. Asaumi, K. Ogura and M. Ebisawa                                           | Oral Immunotherapy in Japanese Children with Anaphylactic Peanut Allergy                                                                        | 2018 | International Archives of Allergy and Immunology                                                                       | INCLUDED | Full Text + author data |
| Nogic, C., J. Belousoff and D. Krieser                                                                                          | The diagnosis and management of children presenting with anaphylaxis to a metropolitan emergency department: A 2-year retrospective case series | 2016 | Journal of Paediatrics and Child Health                                                                                | INCLUDED | Full Text               |
| Noimark, L., G. Du Toit, C. Pasticaldi, D. Haddad, M. Alfaham, J. Gardner, W. Hyer, G. Vance, G. Roberts and J. Warner          | Patient risk factors and treatment of anaphylaxis: A multi-site paediatric study                                                                | 2010 | Allergy: European Journal of Allergy and Clinical Immunology                                                           | INCLUDED | Full Text               |
| Noone, S. R., J.; Sampson, H. A.; Wang, J.                                                                                      | Epinephrine Use in Positive Oral Food Challenges Performed as a Screening Test for Food Allergy Therapy Trials                                  | 2015 | Journal of Allergy and Clinical Immunology: In Practice                                                                | INCLUDED | Full Text               |
| Olabarri, M., S. Gonzalez-Peris, P. Vazquez, A. Gonzalez-Posada, N. Sanz, A. Vinuesa, N. Diez, J. Benito and S. Mintegi         | Management of anaphylaxis in Spain: pediatric emergency care providers' knowledge                                                               | 2018 | European Journal of Emergency Medicine                                                                                 | INCLUDED | Abstract                |
| Oren, E. B., Aleena; Clark, Sunday; Camargo, Carlos A., Jr.                                                                     | Food-induced anaphylaxis and repeated epinephrine treatments                                                                                    | 2007 | Annals of allergy, asthma & immunology : official publication of the American College of Allergy, Asthma, & Immunology | INCLUDED | Full Text               |

|                                                                                                                                                                                                            |                                                                                                                                                       |      |                                                                                                                                                 |          |                         |
|------------------------------------------------------------------------------------------------------------------------------------------------------------------------------------------------------------|-------------------------------------------------------------------------------------------------------------------------------------------------------|------|-------------------------------------------------------------------------------------------------------------------------------------------------|----------|-------------------------|
| Ponce Guevara, L. V., E. Laffond Yges, M. T. Gracia Bara, E. Moreno Rodilla, F. J. Munoz Bellido, M. Lazaro Sastre, E. M. Macias Iglesias, S. de Arriba Mendez, M. V. Campanon Toro and I. Davila Gonzalez | Adherence to anaphylaxis guidelines: Real-world data from the emergency department of a tertiary hospital                                             | 2018 | Journal of Investigational Allergology and Clinical Immunology                                                                                  | INCLUDED | Full Text               |
| Rudders, S. A. B., Aleena; Katzman, Daniel P.; Clark, Sunday; Camargo, Carlos A., Jr.                                                                                                                      | Multiple epinephrine doses for stinging insect hypersensitivity reactions treated in the emergency department                                         | 2010 | Annals of allergy, asthma & immunology : official publication of the American College of Allergy, Asthma, & Immunology                          | INCLUDED | Full Text               |
| Rudders, S. A. Geyer, B. C. Banerji, A. Phipatanakul, W. Clark, S. Camargo Jr, C. A.                                                                                                                       | Obesity is not a risk factor for repeat epinephrine use in the treatment of anaphylaxis                                                               | 2012 | Journal of Allergy and Clinical Immunology                                                                                                      | INCLUDED | Full Text               |
| Rueter, K. T., B.; Bear, N.; Lucas, M.; Borland, M. L.; Prescott, S. L.                                                                                                                                    | Increased Use of Adrenaline in the Management of Childhood Anaphylaxis Over the Last Decade                                                           | 2018 | Journal of Allergy and Clinical Immunology: In Practice                                                                                         | INCLUDED | Full Text + author data |
| Soller, L., T. Teoh, I. Baerg, T. Wong, K. J. Hildebrand, V. E. Cook, C. M. Biggs, N. Lee, L. Yaworski, S. B. Cameron and E. S. Chan                                                                       | Extended analysis of parent and child confidence in recognizing anaphylaxis and using the epinephrine autoinjector during oral food challenges        | 2019 | Journal of Allergy and Clinical Immunology: In Practice                                                                                         | INCLUDED | Full Text + author data |
| Sundquist, B. K., J. Jose, D. Pauze, H. Wang and K. M. Jarvinen                                                                                                                                            | Anaphylaxis risk factors for hospitalization and intensive care: A comparison between adults and children in an upstate New York emergency department | 2019 | Allergy and Asthma Proceedings                                                                                                                  | INCLUDED | Full Text + author data |
| Tiyyagura, G. K. A., L.; Cone, D. C.; Langhan, M.                                                                                                                                                          | Pediatric anaphylaxis management in the prehospital setting                                                                                           | 2014 | Prehospital emergency care : official journal of the National Association of EMS Physicians and the National Association of State EMS Directors | INCLUDED | Full Text               |
| Topal, E. B., A.; Yilmaz, O.; Ertoy Karagol, I. H.; Arga, M.; Demirsoy, M. S.; Turktas, I.                                                                                                                 | Severe anaphylaxis in children: A single-center experience                                                                                            | 2014 | Pediatrics and Neonatology                                                                                                                      | INCLUDED | Full Text               |
| Tsuang, Angela; Menon, Nikhil R.; Bahri, Natasha; Geyman, Lawrence S.; Nowak-Węgrzyn, Anna                                                                                                                 | Risk factors for multiple epinephrine doses in food-triggered anaphylaxis in children                                                                 | 2018 | Annals of Allergy, Asthma & Immunology                                                                                                          | INCLUDED | Full Text + author data |
| Turner, P. J. M., Sam; Joshi, Preeti; Tan, John; Wong, Melanie; Kakakios, Alyson; Campbell, Dianne E.                                                                                                      | Safety of food challenges to extensively heated egg in egg-allergic children: a prospective cohort study                                              | 2013 | Pediatric allergy and immunology : official publication of the European Society of Pediatric Allergy and Immunology                             | INCLUDED | Full Text + author data |
| Tyquin, B. F., L.; Hollinshead, K.; Mulligan, K.; Treloar, M.; Campbell, D.                                                                                                                                | Review of the use of adrenaline autoinjectors (aai) in nsw department of education schools in terms 1 and 2 2017                                      | 2017 | Internal Medicine Journal                                                                                                                       | INCLUDED | Abstract +author data   |
| Uguz, A. L., G.; Pumphrey, R.; Ewan, P.; Warner, J.; Dick, J.; Briggs, D.; Clarke, S.; Reading, D.; Hourihane, J.                                                                                          | Allergic reactions in the community: a questionnaire survey of members of the anaphylaxis campaign                                                    | 2005 | Clinical and experimental allergy : journal of the British Society for Allergy and Clinical Immunology                                          | INCLUDED | Full Text               |
| Van Der Valk, J. P. M. V. W., R. G.; Dubois, A. E. J.; De Groot, H.; Reitsma, M.; Vlieg-Boerstra, B.; Savelkoul, H. F. J.; Wichers, H. J.; De Jong, N. W.                                                  | Multicentre double-blind placebo-controlled food challenge study in children sensitised to cashew nut                                                 | 2016 | PLoS ONE                                                                                                                                        | INCLUDED | Full Text               |

|                                                                                                                                                                     |                                                                                                                                       |      |                                                                                                                        |          |                         |
|---------------------------------------------------------------------------------------------------------------------------------------------------------------------|---------------------------------------------------------------------------------------------------------------------------------------|------|------------------------------------------------------------------------------------------------------------------------|----------|-------------------------|
| Vijaykumar, A. L., S.; Brathwaite, N.                                                                                                                               | Audit of anaphylaxis during food challenges at a paediatric day unit                                                                  | 2017 | Clinical and Experimental Allergy                                                                                      | INCLUDED | Abstract                |
| Villafana-Soto, K. M., S.; Joshi, P.; Wong, M.; Kakakios, A.; Campbell, D.                                                                                          | Safety of food challenges in a tertiary referral children's hospital                                                                  | 2011 | Internal Medicine Journal                                                                                              | INCLUDED | Abstract                |
| Webb, L. M. L., Phil                                                                                                                                                | Anaphylaxis: a review of 601 cases                                                                                                    | 2006 | Annals of allergy, asthma & immunology : official publication of the American College of Allergy, Asthma, & Immunology | INCLUDED | Full Text               |
| White, M. V. H., Susan L.; Bennett, M. Elizabeth; Goss, Diana; Millar, Kimrey; Hollis, Kelly; Siegel, Peter H.; Wolf, Ray A.; Wooddell, Margaret J.; Silvia, Suyapa | EpiPen4Schools pilot survey: Occurrence of anaphylaxis, triggers, and epinephrine administration in a U.S. school setting             | 2015 | Allergy and asthma proceedings                                                                                         | INCLUDED | Full Text               |
| Yanagida, N. S., Sakura; Asaumi, Tomoyuki; Ogura, Kiyotake; Ebisawa, Motohiro                                                                                       | Risk Factors for Severe Reactions during Double-Blind Placebo-Controlled Food Challenges                                              | 2017 | International archives of allergy and immunology                                                                       | INCLUDED | Full Text + author data |
| Yanagida, N., S. Sato, K. Takahashi, K. Nagakura, T. Asaumi, K. Ogura and M. Ebisawa                                                                                | Risk of anaphylaxis during an oral food challenge increases with increasing specific ige levels                                       | 2018 | Journal of Allergy and Clinical Immunology                                                                             | INCLUDED | Abstract +author data   |
| Zubrinich, C., J. Douglass, J. Bartlett, M. Patel and M. Hew                                                                                                        | Anaphylaxis presentations to the emergency department: impending Victorian reporting legislation                                      | 2019 | Internal Medicine Journal                                                                                              | INCLUDED | Full Text               |
| Brough HA, Caubet JC, Mazon A, Haddad D, Bergmann MM, Wassenberg J, Panetta V, Gourgey R, Radulovic S, Nieto M, Santos AF, Nieto A, Lack G, Eigenmann PA.           | Defining challenge-proven coexistent nut and sesame seed allergy: A prospective multicenter European study                            | 2020 | J Allergy Clin Immunol.                                                                                                | INCLUDED | Full Text + author data |
| Capucilli P, Kennedy K, Lee J, Grundmeier RW, Spergel JM.                                                                                                           | Accidental versus new food allergy reactions in a pediatric emergency department                                                      | 2019 | J Allergy Clin Immunol Pract                                                                                           | INCLUDED | Full Text + author data |
| Capucilli, P., Kennedy K, Alfaro M, Spergel Z, Dorris S, Spergel JM.                                                                                                | Age Differences in Food Reaction Severity During Oral Food Challenges in a Large Pediatric Population                                 | 2021 | Journal of Allergy and Clinical Immunology                                                                             | INCLUDED | Full Text + author data |
| Chatelier, J., Lin, T., Stojanovic, S., Dabscheck, E., Zubrinich, C., Bosco, J., Hew, M.                                                                            | Risk factors associated with refractory anaphylaxis                                                                                   | 2019 | Internal Medicine Journal 49 (Supplement 4)                                                                            | INCLUDED | Abstract                |
| Cohen N, Capua T, Pivko-Levy D, Ben-Shoshan M, Rimon A, Benor S.                                                                                                    | Improved diagnosis and treatment of anaphylaxis in a pediatric emergency department (2013-2018)                                       | 2019 | J Allergy Clin Immunol Pract                                                                                           | INCLUDED | Full Text + author data |
| Kahveci M, Akarsu A, Koken G, Sahiner UM, Soyer O, Sekerel BE.                                                                                                      | Food-induced anaphylaxis in infants, as compared to toddlers and preschool children in Turkey                                         | 2020 | Pediatr Allergy Immunol                                                                                                | INCLUDED | Full Text               |
| Muramatsu K, Imamura H, Tokutsu K, Fujimoto K, Fushimi K, Matsuda S.                                                                                                | Epidemiological Study of Hospital Admissions for Food-induced anaphylaxis using the Japanese Diagnosis Procedure Combination Database | 2020 | J Epidemiol                                                                                                            | INCLUDED | Full Text               |
| Murata MA, Yamamoto LG.                                                                                                                                             | Patient/parent administered epinephrine in acute anaphylaxis                                                                          | 2020 | Am J Emerg Med                                                                                                         | INCLUDED | Full Text               |
| Oya S, Kinoshita K, Daya M, Kinoshita H.                                                                                                                            | Characteristics of Anaphylactic Reactions: A Prospective Observational Study in Japan                                                 | 2020 | J Emerg Med                                                                                                            | INCLUDED | Full Text               |
| Trainer JL, Pittsenbarger ZE, Joshi D, Adler MD, Smith B, Gupta RS.                                                                                                 | Outcomes and Factors Associated With Prehospital Treatment of Pediatric Anaphylaxis                                                   | 2020 | Pediatr Emerg Care                                                                                                     | INCLUDED | Full Text               |

## J. Summary of Data Extraction for Included Studies

Table S15. Individual study characteristics for included references

| ID | Reference                  | Anaphylaxis definition used by study authors            | Number of study-defined anaphylaxis events (any trigger) | Number of cardiovascular or lower respiratory reactions (any trigger) | Number of reactions treated with adrenaline | Number of reactions treated with multiple doses of adrenaline | Number of reactions where at least 1 additional dose was administered by a healthcare professional | Reaction Setting    | Study age group | % male | Study design  | Study used for All-trigger meta-analyses | Study used for Food-trigger meta-analyses | Study used for Venom-trigger meta-analyses |
|----|----------------------------|---------------------------------------------------------|----------------------------------------------------------|-----------------------------------------------------------------------|---------------------------------------------|---------------------------------------------------------------|----------------------------------------------------------------------------------------------------|---------------------|-----------------|--------|---------------|------------------------------------------|-------------------------------------------|--------------------------------------------|
| 1  | Dogru et al, 2017          | NIAID                                                   | 66                                                       | 55                                                                    | 21                                          | 0                                                             | 0                                                                                                  | Accidental Reaction | Paediatric      | 74.2   | Retrospective | Yes                                      | Yes                                       | Yes                                        |
| 2  | Van Der Valk et al, 2016   | NIAID                                                   | 49                                                       | 9                                                                     | 8                                           | 0                                                             | 0                                                                                                  | Food Challenge      | Paediatric      | 59.2   | Prospective   | Yes                                      | Yes                                       | .                                          |
| 3  | Maris et al, 2015          | NIAID                                                   | 113                                                      | 113                                                                   | 42                                          | 6                                                             | 5                                                                                                  | Accidental Reaction | Paediatric      | 63.7   | Prospective   | Yes                                      | Yes                                       | Yes                                        |
| 4  | Topal et al, 2014          | NIAID                                                   | 34                                                       | 25                                                                    | 20                                          | 4                                                             | 4                                                                                                  | Accidental Reaction | Paediatric      | 61.8   | Retrospective | Yes                                      | .                                         | .                                          |
| 5  | Chung et al, 2014          | NIAID                                                   | 136                                                      | 76                                                                    | 73                                          | 12                                                            | 12                                                                                                 | Accidental Reaction | Both            | 34.6   | Retrospective | Yes                                      | Yes                                       | Yes                                        |
| 6  | Mulligan et al, 2014       | .                                                       | 13                                                       | .                                                                     | 8                                           | 1                                                             | 1                                                                                                  | Food Challenge      | Paediatric      | .      | Retrospective | Yes                                      | Yes                                       | .                                          |
| 7  | Hsiao et al, 2014          | .                                                       | 36                                                       | .                                                                     | 36                                          | 0                                                             | 0                                                                                                  | Food Challenge      | Paediatric      | .      | Retrospective | Yes                                      | Yes                                       | .                                          |
| 8  | Alqurashi et al, 2015      | NIAID                                                   | 484                                                      | 407                                                                   | 309                                         | 37                                                            | 37                                                                                                 | Accidental Reaction | Paediatric      | 64.9   | Retrospective | Yes                                      | .                                         | .                                          |
| 9  | Farias Aquino et al, 2013  | NIAID                                                   | 203                                                      | 111                                                                   | 33                                          | 9                                                             | 9                                                                                                  | Accidental Reaction | Both            | 47.3   | Retrospective | Yes                                      | Yes                                       | Yes                                        |
| 10 | Abrams et al, 2017         | > than 1 organ system involvement OR use of Adrenaline  | 20                                                       | 4                                                                     | 16                                          | 1                                                             | 1                                                                                                  | Food Challenge      | Paediatric      | 59.6   | Retrospective | Yes                                      | Yes                                       | .                                          |
| 11 | Villafana-Soto et al, 2011 | cardiorespiratory symptoms                              | 15                                                       | 15                                                                    | 7                                           | 2                                                             | 2                                                                                                  | Food Challenge      | Paediatric      | .      | Retrospective | Yes                                      | Yes                                       | .                                          |
| 12 | Arana et al, 2009          | NIAID                                                   | 47                                                       | 40                                                                    | 33                                          | 2                                                             | .                                                                                                  | Accidental Reaction | Paediatric      | 72.0   | Retrospective | Yes                                      | .                                         | .                                          |
| 13 | Ellis et al, 2007          | Canadian Pediatric Surveillance Program: 2 body systems | 134                                                      | 126                                                                   | 106                                         | 26                                                            | .                                                                                                  | Accidental Reaction | Both            | 51.5   | Prospective   | Yes                                      | Yes                                       | Yes                                        |
| 14 | White et al, 2015          | .                                                       | 852                                                      | .                                                                     | 636                                         | 54                                                            | .                                                                                                  | Accidental Reaction | Paediatric      | .      | Retrospective | Yes                                      | .                                         | .                                          |
| 15 | Manivannan et al, 2014     | NIAID                                                   | 63                                                       | .                                                                     | 15                                          | 1                                                             | .                                                                                                  | Accidental Reaction | Both            | 35.0   | Retrospective | Yes                                      | .                                         | .                                          |
| 16 | Johnson et al, 2014        | NIAID                                                   | 303                                                      | 246                                                                   | 239                                         | 7                                                             | .                                                                                                  | Accidental Reaction | Paediatric      | 55.6   | Retrospective | Yes                                      | Yes                                       | .                                          |
| 17 | Brown et al, 2013          | NIAID                                                   | 315                                                      | 300                                                                   | 245                                         | 76                                                            | 64                                                                                                 | Accidental Reaction | Both            | 50.0   | Prospective   | Yes                                      | Yes                                       | Yes                                        |
| 18 | Ben-Shoshan et al, 2013    | NIAID                                                   | 168                                                      | .                                                                     | 122                                         | 10                                                            | 10                                                                                                 | Accidental Reaction | Paediatric      | 51.8   | Retrospective | Yes                                      | .                                         | .                                          |
| 19 | Turner et al, 2013         | NIAID                                                   | 12                                                       | 11                                                                    | 5                                           | 1                                                             | 1                                                                                                  | Food Challenge      | Paediatric      | 58.9   | Prospective   | Yes                                      | Yes                                       | .                                          |
| 20 | Lee et al, 2013            | NIAID                                                   | 310                                                      | .                                                                     | 262                                         | 16                                                            | 16                                                                                                 | Food Challenge      | Paediatric      | 65.8   | Retrospective | Yes                                      | Yes                                       | .                                          |
| 21 | Huang et al, 2012          | NIAID                                                   | 213                                                      | .                                                                     | 169                                         | 13                                                            | 9                                                                                                  | Accidental Reaction | Paediatric      | 51.6   | Retrospective | Yes                                      | .                                         | .                                          |
| 22 | Rudders et al, 2010        | NIAID                                                   | 40                                                       | 27                                                                    | 14                                          | 3                                                             | .                                                                                                  | Accidental Reaction | Both            | 53.6   | Retrospective | Yes                                      | .                                         | Yes                                        |
| 23 | Jarvinen et al, 2009       | use of adrenaline                                       | 50                                                       | 34                                                                    | 50                                          | 3                                                             | 3                                                                                                  | Food Challenge      | Paediatric      | 58.2   | Retrospective | Yes                                      | Yes                                       | .                                          |
| 24 | Manivannan et al, 2009     | NIAID                                                   | 208                                                      | 103                                                                   | 104                                         | 27                                                            | 27                                                                                                 | Accidental Reaction | Both            | 44.2   | Retrospective | Yes                                      | Yes                                       | Yes                                        |
| 25 | Arkwright, 2009            | use of adrenaline                                       | 18                                                       | .                                                                     | 22                                          | 0                                                             | 0                                                                                                  | Accidental Reaction | Paediatric      | 60.0   | Retrospective | Yes                                      | Yes                                       | .                                          |
| 26 | Jarvinen et al, 2008       | use of adrenaline                                       | 95                                                       | .                                                                     | 95                                          | 18                                                            | 17                                                                                                 | Accidental Reaction | Paediatric      | 72.6   | Retrospective | Yes                                      | Yes                                       | .                                          |
| 27 | De Swert et al, 2008       | NIAID                                                   | 64                                                       | 47                                                                    | 11                                          | 4                                                             | .                                                                                                  | Accidental Reaction | Paediatric      | 64.6   | Retrospective | Yes                                      | .                                         | .                                          |
| 28 | Oren et al, 2007           | NIAID                                                   | 19                                                       | 12                                                                    | 14                                          | 3                                                             | .                                                                                                  | Accidental Reaction | Both            | .      | Retrospective | Yes                                      | Yes                                       | .                                          |
| 29 | Webb and Lieberman, 2004   | use of adrenaline                                       | 14                                                       | .                                                                     | 14                                          | 4                                                             | .                                                                                                  | Accidental Reaction | Both            | 37.6   | Retrospective | Yes                                      | .                                         | .                                          |
| 30 | Uguz et al, 2005           | .                                                       | 50                                                       | 47                                                                    | 22                                          | 4                                                             | .                                                                                                  | Accidental Reaction | Both            | 47.7   | Retrospective | Yes                                      | Yes                                       | .                                          |
| 31 | Rueter et al, 2018         | NIAID                                                   | 251                                                      | 251                                                                   | 175                                         | 20                                                            | 20                                                                                                 | Accidental Reaction | Paediatric      | 71.7   | Retrospective | Yes                                      | Yes                                       | Yes                                        |
| 32 | Kondo et al, 2018          | .                                                       | 68                                                       | 52                                                                    | 48                                          | 8                                                             | 8                                                                                                  | Accidental Reaction | Both            | 77.9   | Retrospective | Yes                                      | .                                         | .                                          |
| 33 | Goh et al, 2018            | NIAID                                                   | 366                                                      | 302                                                                   | 312                                         | 17                                                            | 16                                                                                                 | Accidental Reaction | Both            | 50.9   | Retrospective | Yes                                      | Yes                                       | Yes                                        |
| 34 | Lee et al, 2017            | NIAID                                                   | 872                                                      | 609                                                                   | 514                                         | 79                                                            | 26                                                                                                 | Accidental Reaction | Both            | 42.0   | Both          | Yes                                      | .                                         | .                                          |
| 35 | Tyquin et al, 2017         | ASCIA                                                   | 153                                                      | .                                                                     | 153                                         | 20                                                            | .                                                                                                  | Accidental Reaction | Paediatric      | 59.0   | Retrospective | Yes                                      | Yes                                       | Yes                                        |
| 36 | Yanagida et al, 2017       | NIAID                                                   | 190                                                      | 165                                                                   | 90                                          | 20                                                            | 20                                                                                                 | Food Challenge      | Both            | 68.0   | Retrospective | Yes                                      | Yes                                       | .                                          |
| 37 | Noone et al, 2015          | NCI-CTCAE                                               | 42                                                       | 42                                                                    | 29                                          | 2                                                             | 2                                                                                                  | Food Challenge      | Both            | 67.6   | Retrospective | Yes                                      | Yes                                       | .                                          |
| 38 | Capps and Arkwright, 2010  | cardiorespiratory symptoms                              | 514                                                      | 475                                                                   | 116                                         | 4                                                             | 4                                                                                                  | Accidental Reaction | Both            | 39.6   | Retrospective | Yes                                      | Yes                                       | Yes                                        |
| 39 | Tiyagura et al, 2014       | NIAID                                                   | 218                                                      | 149                                                                   | 126                                         | 5                                                             | .                                                                                                  | Accidental Reaction | Paediatric      | 56.0   | Retrospective | Yes                                      | .                                         | .                                          |
| 40 | Campbell et al, 2015       | NIAID                                                   | 582                                                      | 492                                                                   | 326                                         | 45                                                            | .                                                                                                  | Accidental Reaction | Both            | 42.0   | Both          | Yes                                      | .                                         | .                                          |
| 41 | Grabenhenrich et al, 2018  | .                                                       | 8187                                                     | 8006                                                                  | 1669                                        | 174                                                           | 172                                                                                                | Accidental Reaction | Both            | 48.8   | Prospective   | Yes                                      | Yes                                       | Yes                                        |
| 42 | Vijaykumar et al, 2017     | .                                                       | 24                                                       | .                                                                     | 24                                          | 3                                                             | 3                                                                                                  | Food Challenge      | Paediatric      | 70.8   | Retrospective | Yes                                      | Yes                                       | .                                          |
| 43 | Tsuang et al, 2018         | .                                                       | 221                                                      | .                                                                     | 221                                         | 24                                                            | 18                                                                                                 | Accidental Reaction | Paediatric      | 59.0   | Retrospective | Yes                                      | Yes                                       | .                                          |
| 44 | Tsuang et al, 2018         | .                                                       | 14                                                       | .                                                                     | 14                                          | 1                                                             | .                                                                                                  | Accidental Reaction | Paediatric      | 63.0   | Prospective   | Yes                                      | Yes                                       | .                                          |



| ID | Reference                 | Anaphylaxis definition used by study authors | Number of study-defined anaphylaxis events (any trigger) | Number of cardiovascular or lower respiratory reactions (any trigger) | Number of reactions treated with adrenaline | Number of reactions treated with multiple doses of adrenaline | Number of reactions where at least 1 additional dose was administered by a healthcare professional | Reaction Setting    | Study age group | % male | Study design  | Study used for All-trigger meta-analyses | Study used for Food-trigger meta-analyses | Study used for Venom-trigger meta-analyses |
|----|---------------------------|----------------------------------------------|----------------------------------------------------------|-----------------------------------------------------------------------|---------------------------------------------|---------------------------------------------------------------|----------------------------------------------------------------------------------------------------|---------------------|-----------------|--------|---------------|------------------------------------------|-------------------------------------------|--------------------------------------------|
| 45 | Kim et al, 2018           | NIAID                                        | 185                                                      | .                                                                     | 114                                         | 25                                                            | 25                                                                                                 | Accidental Reaction | Adult           | 45.0   | Retrospective | Yes                                      | .                                         | .                                          |
| 46 | Dribin et al, 2019        | NIAID                                        | 665                                                      | .                                                                     | 339                                         | 81                                                            | .                                                                                                  | Accidental Reaction | Both            | 56.7   | Retrospective | Yes                                      | .                                         | .                                          |
| 47 | Soller et al, 2019        | NIAID                                        | 55                                                       | 18                                                                    | 53                                          | 9                                                             | 9                                                                                                  | Food Challenge      | Paediatric      | 64.0   | Prospective   | Yes                                      | Yes                                       | .                                          |
| 48 | Hamilton et al, 2019      | CoFAR grading of allergic reactions          | 47                                                       | .                                                                     | 47                                          | 9                                                             | 9                                                                                                  | Food Challenge      | Paediatric      | 63.3   | Retrospective | Yes                                      | Yes                                       | .                                          |
| 49 | Anvari S et al, 2019      | NIAID                                        | 275                                                      | 180                                                                   | 243                                         | 25                                                            | .                                                                                                  | Accidental Reaction | Paediatric      | 53.3   | Retrospective | Yes                                      | Yes                                       | .                                          |
| 50 | Giclas et al, 2019        | Brown, NIAID/FAAN, and Niggemann & Beyer     | 59                                                       | 44                                                                    | 52                                          | 4                                                             | 4                                                                                                  | Food Challenge      | Paediatric      | 63.0   | Retrospective | Yes                                      | Yes                                       | .                                          |
| 51 | Elizur et al, 2018        | 2 systems                                    | 93                                                       | 31                                                                    | 41                                          | 1                                                             | 1                                                                                                  | Food Challenge      | Both            | 55.4   | Prospective   | Yes                                      | Yes                                       | .                                          |
| 52 | Sundquist et al, 2019     | NIAID                                        | 267                                                      | 222                                                                   | 142                                         | 23                                                            | 19                                                                                                 | Accidental Reaction | Both            | 42.7   | Retrospective | Yes                                      | Yes                                       | Yes                                        |
| 53 | Coutinho et al, 2018      | NIAID                                        | 32                                                       | 25                                                                    | 25                                          | 3                                                             | 3                                                                                                  | Accidental Reaction | Both            | 56.3   | Retrospective | Yes                                      | Yes                                       | Yes                                        |
| 54 | Ponce Guevara et al, 2018 | NIAID                                        | 89                                                       | 72                                                                    | 37                                          | 7                                                             | 7                                                                                                  | Accidental Reaction | Both            | 50.6   | Retrospective | Yes                                      | .                                         | .                                          |
| 55 | Nagakura et al, 2018      | NIAID                                        | 25                                                       | 8                                                                     | 9                                           | 0                                                             | .                                                                                                  | Food Challenge      | Paediatric      | 72.0   | Prospective   | Yes                                      | Yes                                       | .                                          |
| 56 | Yanagida et al, 2018      | NIAID                                        | 334                                                      | .                                                                     | 45                                          | 2                                                             | 2                                                                                                  | Food Challenge      | Both            | 67.3   | Prospective   | Yes                                      | Yes                                       | .                                          |
| 57 | Asami et al, 2016         | .                                            | 30                                                       | 9                                                                     | 6                                           | 0                                                             | .                                                                                                  | Food Challenge      | Paediatric      | 65.0   | Retrospective | Yes                                      | Yes                                       | .                                          |
| 58 | Nogic et al, 2016         | ASCIA                                        | 52                                                       | 51                                                                    | 49                                          | 9                                                             | 9                                                                                                  | Accidental Reaction | Paediatric      | 62.0   | Retrospective | Yes                                      | .                                         | .                                          |
| 59 | Lee and Stukus, 2015      | NIAID                                        | 408                                                      | 311                                                                   | 330                                         | 21                                                            | 21                                                                                                 | Accidental Reaction | Paediatric      | 62.0   | Retrospective | Yes                                      | Yes                                       | .                                          |
| 60 | Inoue and Yamamoto, 2013  | NIAID                                        | 61                                                       | 56                                                                    | 35                                          | 3                                                             | 3                                                                                                  | Accidental Reaction | Paediatric      | 65.6   | Retrospective | Yes                                      | Yes                                       | .                                          |
| 61 | Itazawa et al, 2019       | Not defined Sampson severity used            | 531                                                      | 895                                                                   | 160                                         | 10                                                            | 10                                                                                                 | Food Challenge      | Paediatric      | 65.2   | Prospective   | Yes                                      | Yes                                       | .                                          |
| 62 | Brennan et al, 2013       | NIAID                                        | 22                                                       | 13                                                                    | 22                                          | 2                                                             | 2                                                                                                  | Food Challenge      | Paediatric      | 81.2   | Retrospective | Yes                                      | Yes                                       | .                                          |
| 63 | Noimark et al, 2012       | NIAID                                        | 245                                                      | 150                                                                   | 41                                          | 13                                                            | 9                                                                                                  | Accidental Reaction | Paediatric      | 58.7   | Retrospective | Yes                                      | .                                         | .                                          |
| 64 | Dibs and Baker, 1997      | cardiorespiratory symptoms                   | 55                                                       | 51                                                                    | 46                                          | 7                                                             | .                                                                                                  | Accidental Reaction | Both            | 56.0   | Retrospective | Yes                                      | .                                         | .                                          |
| 65 | Cardona et al, 2017       | use of adrenaline                            | 268                                                      | 260                                                                   | 268                                         | 43                                                            | 40                                                                                                 | Accidental Reaction | Both            | 48.5   | Retrospective | Yes                                      | Yes                                       | Yes                                        |
| 66 | Coutinho et al, 2019      | NIAID                                        | 43                                                       | 41                                                                    | 38                                          | 8                                                             | 8                                                                                                  | Accidental Reaction | Adult           | 53.5   | Retrospective | Yes                                      | Yes                                       | .                                          |
| 67 | Ewan and Clark, 2005      | cardiorespiratory symptoms                   | 27                                                       | 27                                                                    | 3                                           | 0                                                             | 0                                                                                                  | Accidental Reaction | Paediatric      | 58.0   | Prospective   | Yes                                      | Yes                                       | .                                          |
| 68 | Ewan and Clark, 2008      | cardiorespiratory symptoms                   | 269                                                      | 269                                                                   | 36                                          | 0                                                             | 0                                                                                                  | Accidental Reaction | Paediatric      | .      | Retrospective | Yes                                      | Yes                                       | .                                          |
| 69 | Ewan and Clark, 2008      | cardiorespiratory symptoms                   | 22                                                       | 22                                                                    | 3                                           | 0                                                             | 0                                                                                                  | Accidental Reaction | Paediatric      | .      | Prospective   | Yes                                      | Yes                                       | .                                          |
| 70 | Ewan and Clark, 2001      | cardiorespiratory symptoms                   | 26                                                       | 26                                                                    | 22                                          | 0                                                             | 0                                                                                                  | Accidental Reaction | Both            | 50.0   | Prospective   | Yes                                      | Yes                                       | .                                          |
| 71 | Gold and Sainsbury, 2000  | cardiorespiratory symptoms                   | 45                                                       | 45                                                                    | 13                                          | 2                                                             | 2                                                                                                  | Accidental Reaction | Paediatric      | .      | Retrospective | Yes                                      | .                                         | .                                          |
| 72 | Zubrinich et al, 2019     | cardiorespiratory symptoms                   | 56                                                       | 34                                                                    | 44                                          | 13                                                            | 13                                                                                                 | Accidental Reaction | Both            | 30.0   | Retrospective | Yes                                      | Yes                                       | .                                          |
| 73 | Liu et al, 2019           | NIAID                                        | 430                                                      | 357                                                                   | 305                                         | 50                                                            | 50                                                                                                 | Accidental Reaction | Both            | 42.0   | Prospective   | Yes                                      | Yes                                       | Yes                                        |
| 74 | Olabbari et al, 2019      | .                                            | 453                                                      | .                                                                     | 428                                         | 53                                                            | 53                                                                                                 | Accidental Reaction | Paediatric      | .      | Prospective   | Yes                                      | .                                         | .                                          |
| 75 | Mehr et al, 2009          | NIAID                                        | 109                                                      | 109                                                                   | 64                                          | 15                                                            | 15                                                                                                 | Accidental Reaction | Paediatric      | 59.8   | Retrospective | Yes                                      | .                                         | .                                          |
| 76 | Rudders et al, 2012       | .                                            | 321                                                      | 262                                                                   | 321                                         | 54                                                            | .                                                                                                  | Accidental Reaction | Paediatric      | 47.0   | Retrospective | Yes                                      | Yes                                       | Yes                                        |
| 77 | Banerji et al, 2010       | .                                            | 295                                                      | .                                                                     | 91                                          | 15                                                            | 14                                                                                                 | Accidental Reaction | Adult           | 38.0   | Retrospective | Yes                                      | Yes                                       | .                                          |
| 78 | Gabrielli et al, 2019     | NIAID                                        | 3498                                                     | 1669                                                                  | 2558                                        | 282                                                           | 223                                                                                                | Accidental Reaction | Both            | 55.6   | Prospective   | Yes                                      | Yes                                       | Yes                                        |
| 79 | Brough et al, 2020        | Sampson                                      | 39                                                       | 28                                                                    | 43                                          | 6                                                             | 6                                                                                                  | Food Challenge      | Paediatric      | 69.0   | Prospective   | Yes                                      | Yes                                       | .                                          |
| 80 | Capucilli et al, 2019     | Multisystem                                  | 141                                                      | 33                                                                    | 142                                         | 14                                                            | 14                                                                                                 | Accidental Reaction | Paediatric      | 50.0   | Retrospective | Yes                                      | Yes                                       | .                                          |
| 81 | Capucilli et al, 2021     | cardiorespiratory or use of adrenaline       | 440                                                      | 143                                                                   | 440                                         | 69                                                            | 69                                                                                                 | Food Challenge      | Paediatric      | .      | Retrospective | Yes                                      | Yes                                       | .                                          |
| 82 | Chatelier et al, 2019     | NIAID                                        | 174                                                      | .                                                                     | 163                                         | 77                                                            | .                                                                                                  | Accidental Reaction | Both            | 44.2   | Retrospective | Yes                                      | .                                         | .                                          |
| 83 | Cohen et al, 2019         | NIAID                                        | 375                                                      | 67                                                                    | 238                                         | 11                                                            | 8                                                                                                  | Accidental Reaction | Paediatric      | 61.0   | Retrospective | Yes                                      | Yes                                       | Yes                                        |
| 84 | Kahveci et al, 2020       | NIAID                                        | 175                                                      | 103                                                                   | 71                                          | 1                                                             | .                                                                                                  | Accidental Reaction | Paediatric      | 67.5   | Retrospective | Yes                                      | Yes                                       | .                                          |
| 85 | Muramatsu et al, 2020     | ICD                                          | 9078                                                     | .                                                                     | 4192                                        | 243                                                           | .                                                                                                  | Accidental Reaction | Both            | 57.0   | Retrospective | Yes                                      | .                                         | .                                          |
| 86 | Murata et al, 2020        | use of adrenaline                            | 181                                                      | .                                                                     | 181                                         | 24                                                            | .                                                                                                  | Accidental Reaction | Both            | 55.8   | Retrospective | Yes                                      | .                                         | .                                          |
| 87 | Oya et al, 2020           | NIAID                                        | 302                                                      | 248                                                                   | 207                                         | 7                                                             | .                                                                                                  | Accidental Reaction | Both            | 39.7   | Prospective   | Yes                                      | .                                         | .                                          |
| 88 | Trainor et al, 2020       | NIAID                                        | 414                                                      | 199                                                                   | 163                                         | 48                                                            | 48                                                                                                 | Accidental Reaction | Paediatric      | 54.3   | Retrospective | Yes                                      | .                                         | .                                          |

End of Online Supplement
